# Supplementary material for: Circulating miR-132-3p as a Candidate Diagnostic Biomarker for Malignant Mesothelioma
Source: Hindawi journal article supplement (doi:10.1155/2017/9280170), 2017-01-01
Supplement: f1 [file 9280170.f1.pdf]

**Additional File 1.** Sensitivity and specificity of candidate biomarkers in the discovery phase (GM: geometric mean).

| miRNA       | Reference                          | Sensitivity | Specificity | True positive | True negative | False positive | False negative |
|-------------|------------------------------------|-------------|-------------|---------------|---------------|----------------|----------------|
|             |                                    | (%)         | (%)         | (N)           | (N)           | (N)            | (N)            |
| miR-331     | miR-146b-5p                        | 100         | 95          | 21            | 20            | 1              | 0              |
| miR-24      | miR-146b-5p                        | 90          | 95          | 19            | 20            | 1              | 2              |
| miR-532     | miR-146b-5p                        | 90          | 95          | 19            | 20            | 1              | 2              |
| miR-132     | miR-146b-5p                        | 86          | 95          | 18            | 20            | 1              | 3              |
| miR-140-3p  | miR-146b-5p                        | 86          | 95          | 18            | 20            | 1              | 3              |
| miR-191     | miR-146b-5p                        | 86          | 95          | 18            | 20            | 1              | 3              |
| miR-628-5p  | miR-146b-5p                        | 86          | 95          | 18            | 20            | 1              | 3              |
| miR-532     | miR-20b                            | 95          | 95          | 20            | 20            | 1              | 1              |
| miR-660     | miR-20b                            | 90          | 95          | 19            | 20            | 1              | 2              |
| miR-193a-5p | miR-20b                            | 86          | 95          | 18            | 20            | 1              | 3              |
| miR-381     | miR-20b                            | 86          | 95          | 18            | 20            | 1              | 3              |
| miR-628-5p  | miR-20b                            | 86          | 95          | 18            | 20            | 1              | 3              |
| miR-191     | miR-28-3p                          | 90          | 95          | 19            | 20            | 1              | 2              |
| miR-132     | miR-28-3p                          | 86          | 95          | 18            | 20            | 1              | 3              |
| miR-155     | miR-28-3p                          | 86          | 95          | 18            | 20            | 1              | 3              |
| miR-331     | GM (miR-20b/miR-146b-5p)           | 100         | 95          | 21            | 20            | 1              | 0              |
| miR-140-3p  | GM (miR-20b/miR-146b-5p)           | 95          | 95          | 20            | 20            | 1              | 1              |
| miR-532     | GM (miR-20b/miR-146b-5p)           | 95          | 95          | 20            | 20            | 1              | 1              |
| miR-24      | GM (miR-20b/miR-146b-5p)           | 90          | 95          | 19            | 20            | 1              | 2              |
| miR-328     | GM (miR-20b/miR-146b-5p)           | 90          | 95          | 19            | 20            | 1              | 2              |
| miR-628-5p  | GM (miR-20b/miR-146b-5p)           | 86          | 95          | 18            | 20            | 1              | 3              |
| miR-660     | GM (miR-20b/miR-146b-5p)           | 86          | 95          | 18            | 20            | 1              | 3              |
| miR-140-3p  | GM (miR-28-3p/miR-146b-5p)         | 95          | 95          | 20            | 20            | 1              | 1              |
| miR-24      | GM (miR-28-3p/miR-146b-5p)         | 95          | 95          | 20            | 20            | 1              | 1              |
| miR-191     | GM (miR-28-3p/miR-146b-5p)         | 90          | 95          | 19            | 20            | 1              | 2              |
| miR-331     | GM (miR-28-3p/miR-146b-5p)         | 90          | 95          | 19            | 20            | 1              | 2              |
| miR-532     | GM (miR-28-3p/miR-146b-5p)         | 90          | 95          | 19            | 20            | 1              | 2              |
| miR-140-3p  | GM (miR-20b/miR-28-3p)             | 95          | 95          | 20            | 20            | 1              | 1              |
| miR-532     | GM (miR-20b/miR-28-3p)             | 95          | 95          | 20            | 20            | 1              | 1              |
| miR-24      | GM (miR-20b/miR-28-3p)             | 90          | 95          | 19            | 20            | 1              | 2              |
| miR-331     | GM (miR-20b/miR-28-3p)             | 90          | 95          | 19            | 20            | 1              | 2              |
| miR-191     | GM (miR-20b/miR-28-3p)             | 86          | 95          | 18            | 20            | 1              | 3              |
| miR-628-5p  | GM (miR-20b/miR-28-3p)             | 86          | 95          | 18            | 20            | 1              | 3              |
| miR-660     | GM (miR-20b/miR-28-3p)             | 86          | 95          | 18            | 20            | 1              | 3              |
| miR-140-3p  | GM (miR-20b/miR-28-3p/miR-146b-5p) | 95          | 95          | 20            | 20            | 1              | 1              |
| miR-331     | GM (miR-20b/miR-28-3p/miR-146b-5p) | 95          | 95          | 20            | 20            | 1              | 1              |
| miR-532     | GM (miR-20b/miR-28-3p/miR-146b-5p) | 95          | 95          | 20            | 20            | 1              | 1              |
| miR-24      | GM (miR-20b/miR-28-3p/miR-146b-5p) | 90          | 95          | 19            | 20            | 1              | 2              |
| miR-191     | GM (miR-20b/miR-28-3p/miR-146b-5p) | 86          | 95          | 18            | 20            | 1              | 3              |
| miR-628-5p  | GM (miR-20b/miR-28-3p/miR-146b-5p) | 86          | 95          | 18            | 20            | 1              | 3              |

**Additional File 2.** Hemoglobin levels (g/l) in plasma samples spiked-in with lysed erythrocytes of three voluntary subjects.

| Subject | Grade of hemolysis (%) |       |      |      |      |      |
|---------|------------------------|-------|------|------|------|------|
|         | 0                      | 0.125 | 0.25 | 0.5  | 1    | 2    |
| 1       | 0.15                   | 0.24  | 0.32 | 0.63 | 1.11 | 1.91 |
| 2       | 0.18                   | 0.47  | n.d. | 0.82 | 1.28 | 2.23 |
| 3       | 0.09                   | 0.21  | 0.39 | 0.62 | 1.07 | 1.89 |

n.d.: not determined

**Additional File 3.** Foldchanges of miRNAs in plasma samples spiked-in with lysed erythrocytes. Significant increased fold changes (> 2) are marked red.

| miRNA       | Subject | Grade of hemolysis (%) |      |      |      |       |
|-------------|---------|------------------------|------|------|------|-------|
|             |         | 0.125                  | 0.25 | 0.5  | 1    | 2     |
| miR-140-3p  | 1       | 1.1                    | 2.3  | 2.2  | 3.8  | 9.5   |
|             | 2       | 2.2                    | 1.3  | 2.3  | 9.1  | 25.6  |
|             | 3       | 1.8                    | 3.9  | 4.5  | 22.5 | 22.8  |
| miR-381     | 1       | 0.8                    | 1.0  | 0.6  | 0.6  | 1.0   |
|             | 2       | 0.3                    | 0.2  | 0.3  | 0.3  | 0.2   |
|             | 3       | 0.4                    | 0.7  | 1.1  | 1.1  | 1.2   |
| miR-155     | 1       | 0.5                    | 0.6  | 0.6  | 0.3  | 1.4   |
|             | 2       | 0.2                    | 0.2  | 0.2  | 0.3  | 0.3   |
|             | 3       | 1.0                    | 1.5  | 1.8  | 3.3  | 7.9   |
| miR-660     | 1       | 1.0                    | 1.9  | 2.7  | 6.1  | 14.6  |
|             | 2       | 3.7                    | 2.4  | 4.3  | 15.8 | 23.3  |
|             | 3       | 1.8                    | 3.6  | 7.3  | 13.2 | 24.8  |
| miR-24      | 1       | 0.3                    | 0.6  | 0.9  | 0.8  | 1.4   |
|             | 2       | 0.2                    | 0.2  | 0.3  | 0.4  | 0.4   |
|             | 3       | 1.4                    | 1.2  | 1.3  | 2.0  | 5.4   |
| miR-191     | 1       | 0.7                    | 1.0  | 1.6  | 2.3  | 4.1   |
|             | 2       | 0.3                    | 0.4  | 0.6  | 1.3  | 2.1   |
|             | 3       | 1.7                    | 2.0  | 2.5  | 5.1  | 17.7  |
| miR-331     | 1       | 0.5                    | 0.7  | 1.0  | 2.1  | 5.6   |
|             | 2       | 0.7                    | 0.4  | 0.9  | 3.1  | 4.3   |
|             | 3       | 0.6                    | 1.3  | 2.3  | 5.6  | 27.5  |
| miR-20b     | 1       | 0.5                    | 1.6  | 4.0  | 7.5  | 20.1  |
|             | 2       | 2.1                    | 1.8  | 4.9  | 13.2 | 27.3  |
|             | 3       | 3.0                    | 7.4  | 10.4 | 20.5 | 148.1 |
| miR-28-3p   | 1       | 0.3                    | 0.4  | 0.5  | 0.3  | 0.9   |
|             | 2       | 0.2                    | 0.1  | 0.2  | 0.4  | 0.3   |
|             | 3       | 0.6                    | 0.8  | 1.0  | 1.9  | 3.8   |
| miR-132-3p  | 1       | 0.8                    | 0.7  | 1.2  | 0.5  | 2.0   |
|             | 2       | 0.3                    | 0.5  | 0.8  | 2.0  | 3.3   |
|             | 3       | 1.0                    | 0.7  | 1.1  | 1.5  | 1.1   |
| miR-146b    | 1       | 0.3                    | 0.6  | 0.9  | 0.8  | 1.4   |
|             | 2       | 0.2                    | 0.2  | 0.2  | 0.5  | 0.6   |
|             | 3       | 0.7                    | 1.0  | 0.9  | 1.6  | 8.1   |
| miR-532     | 1       | 0.5                    | 1.2  | 2.4  | 4.4  | 13.2  |
|             | 2       | 1.7                    | 1.3  | 2.5  | 6.8  | 13.6  |
|             | 3       | 1.7                    | 2.5  | 4.7  | 16.4 | 57.3  |
| miR-328     | 1       | 0.2                    | 0.4  | 1.0  | 0.6  | 2.2   |
|             | 2       | 0.2                    | 0.2  | 0.3  | 0.6  | 0.7   |
|             | 3       | 1.4                    | 2.1  | 3.2  | 5.0  | 11.4  |
| miR-193a-5p | 1       | 0.8                    | 0.5  | 1.0  | 1.5  | 2.2   |
|             | 2       | 1.0                    | 0.9  | 1.0  | 1.2  | 1.6   |
|             | 3       | 1.1                    | 0.7  | 0.7  | 2.1  | 1.6   |
| miR-628-5p  | 1       | 1.0                    | 1.0  | 3.6  | 4.5  | 13.2  |
|             | 2       | 0.2                    | 0.2  | 0.4  | 1.6  | 1.1   |
|             | 3       | 1.0                    | 1.0  | 1.2  | 1.0  | 5.9   |

**Additional File 4.** Box plot of the four approaches in the discovery group using TLDA. (A) miR-24 – miR-146b-5p, (B) miR-24 – GM (miR-146b-5p/miR-28-3p), (C) miR-132-3p – miR-146b-5p, and (D) miR-132-3p – miR-28-3p. Wilcoxon rank sum tests were performed to examine group differences.

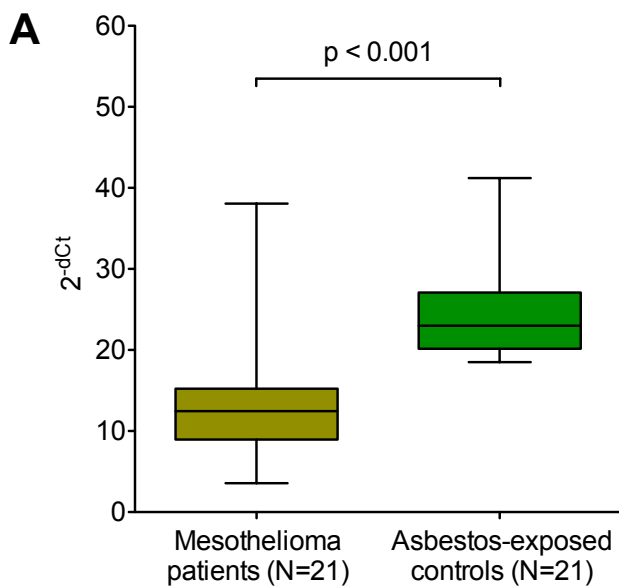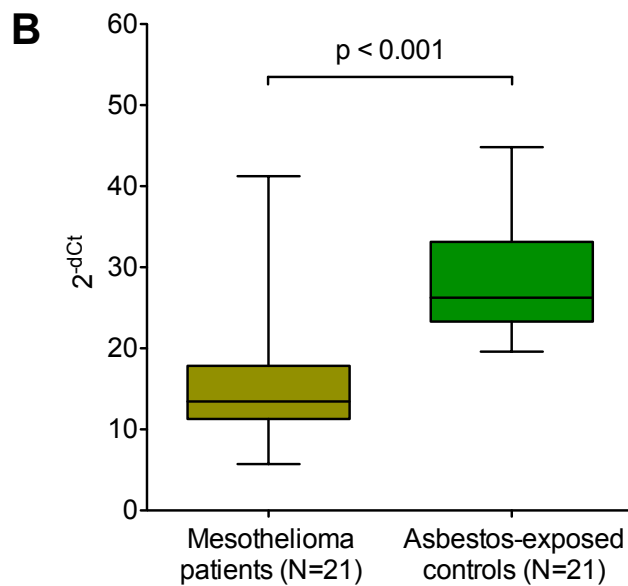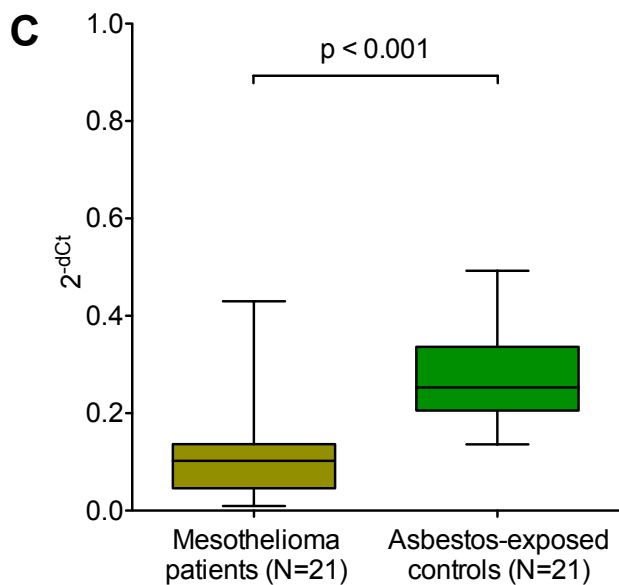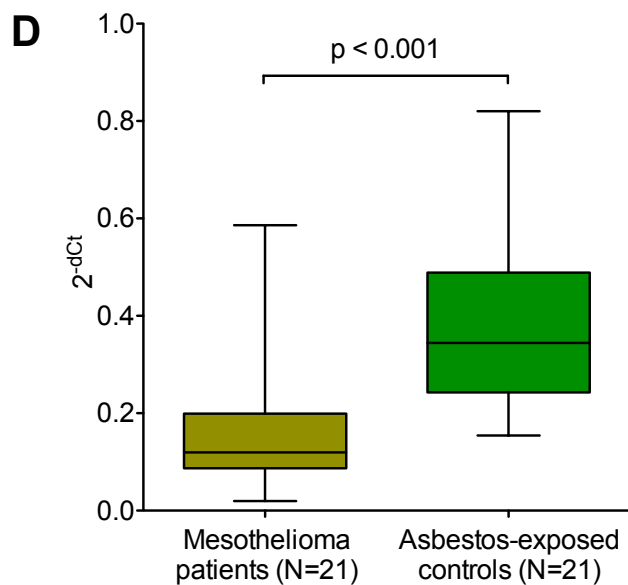

**Additional File 5.** Box plots and receiver operating characteristic (ROC) curves for miR-126 (A, B) and miR-625-3p (C, D) in the verification study group. Wilcoxon rank sum tests were performed to examine group differences.

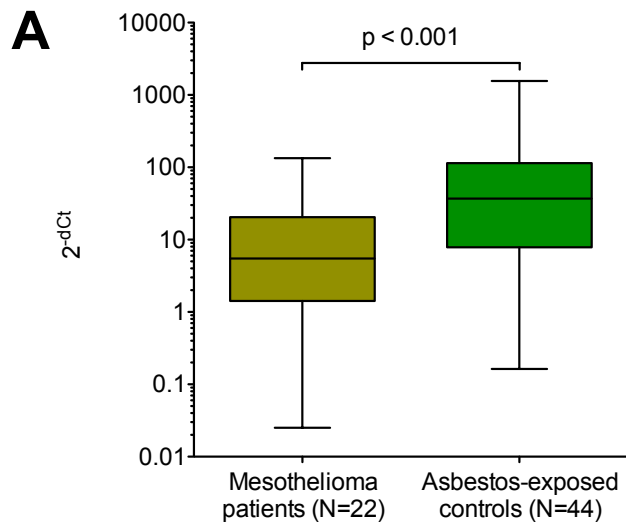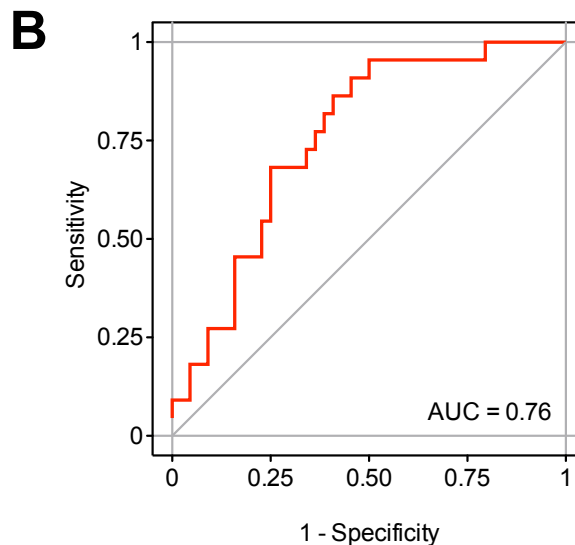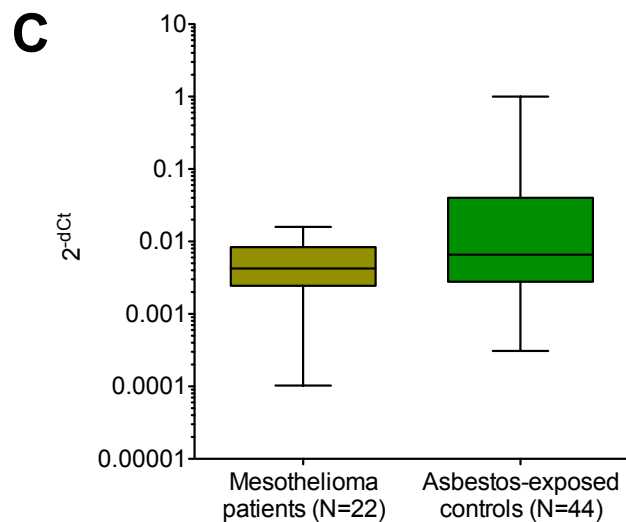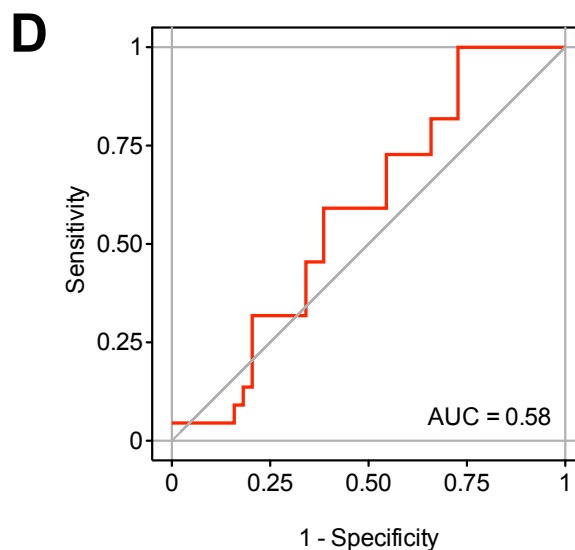

**Additional File 6.** Sensitivity and specificity of the *and* and *sequential* algorithms for miR-132-3p/miR-126, calculated for maximum Youden's Index (YI) and fixed false positive rates (FPR) of 0%, 5%, and 11%, utilizing bootstrap analysis with 500 samples.

| <b>Algorithm</b>  | <b>FPR (%)</b> | <b>Sensitivity (95% CI)</b> | <b>Specificity (95% CI)</b> |
|-------------------|----------------|-----------------------------|-----------------------------|
| <i>and</i>        | Maximum YI     | 80 (59 - 95)                | 85 (61 - 98)                |
|                   | 0              | 22 (5 - 64)                 | 100                         |
|                   | 5              | 43 (9 - 82)                 | 95                          |
|                   | 11             | 58 (23 - 91)                | 89                          |
| <i>sequential</i> | Maximum YI     | 95 (82 - 100)               | 73 (57 - 89)                |
|                   | 0              | 24 (9 - 50)                 | 100                         |
|                   | 5              | 37 (9 - 68)                 | 95                          |
|                   | 11             | 57 (23 - 86)                | 89                          |

**Additional File 7 A.** Raw data of biomarker discovery utilizing commercial TaqMan Low Density Array Human MicroRNA Card A v2.0 (TLDA).

| Age | Gender | Smoking status | Group            | Subtype     | ath-miR159a | hsa-let-7a | hsa-let-7b | hsa-let-7c | hsa-let-7d | hsa-let-7e | hsa-let-7f |
|-----|--------|----------------|------------------|-------------|-------------|------------|------------|------------|------------|------------|------------|
| 54  | Male   | Ever           | Mesothelioma     | Biphasic    | 40,00       | 40,00      | 29,00      | 40,00      | 30,31      | 26,83      | 40,00      |
| 72  | Male   | Ever           | Mesothelioma     | Biphasic    | 40,00       | 40,00      | 31,02      | 40,00      | 34,05      | 29,39      | 40,00      |
| 68  | Male   | Never          | Mesothelioma     | Epithelioid | 40,00       | 40,00      | 27,32      | 31,93      | 29,20      | 26,00      | 40,00      |
| 34  | Male   | Ever           | Mesothelioma     | Epithelioid | 40,00       | 28,22      | 24,71      | 31,51      | 26,30      | 23,44      | 40,00      |
| 70  | Male   | Never          | Mesothelioma     | Biphasic    | 40,00       | 29,71      | 25,80      | 31,13      | 27,58      | 24,59      | 40,00      |
| 59  | Male   | Never          | Mesothelioma     | Epithelioid | 40,00       | 40,00      | 26,74      | 40,00      | 28,03      | 25,17      | 40,00      |
| 74  | Male   | Never          | Mesothelioma     | Epithelioid | 40,00       | 32,97      | 28,91      | 34,83      | 31,09      | 27,95      | 40,00      |
| 73  | Male   | Never          | Mesothelioma     | Epithelioid | 40,00       | 29,23      | 24,94      | 31,29      | 27,08      | 25,41      | 40,00      |
| 72  | Male   | Never          | Mesothelioma     | Sarcomatoid | 40,00       | 25,01      | 23,07      | 30,22      | 24,28      | 22,02      | 30,28      |
| 66  | Male   | Ever           | Mesothelioma     | Epithelioid | 40,00       | 27,24      | 22,98      | 29,20      | 25,38      | 23,00      | 40,00      |
| 73  | Male   | Ever           | Mesothelioma     | Biphasic    | 40,00       | 31,15      | 25,70      | 33,08      | 28,84      | 26,24      | 40,00      |
| 53  | Male   | Never          | Mesothelioma     | Epithelioid | 40,00       | 40,00      | 27,39      | 40,00      | 28,52      | 26,08      | 40,00      |
| 56  | Male   | Ever           | Mesothelioma     | Epithelioid | 40,00       | 26,86      | 24,61      | 29,79      | 25,84      | 23,23      | 30,03      |
| 77  | Male   | Ever           | Mesothelioma     | Epithelioid | 40,00       | 40,00      | 25,90      | 30,53      | 29,71      | 26,22      | 40,00      |
| 84  | Male   | Never          | Mesothelioma     | Epithelioid | 40,00       | 32,41      | 27,43      | 33,63      | 29,13      | 25,95      | 40,00      |
| 76  | Male   | Ever           | Mesothelioma     | Sarcomatoid | 40,00       | 27,24      | 25,87      | 34,29      | 27,41      | 24,55      | 40,00      |
| 72  | Male   | Ever           | Mesothelioma     | Epithelioid | 40,00       | 31,00      | 27,50      | 33,61      | 28,71      | 25,83      | 40,00      |
| 77  | Male   | Ever           | Mesothelioma     | Sarcomatoid | 40,00       | 40,00      | 29,76      | 40,00      | 31,46      | 28,92      | 40,00      |
| 85  | Male   | Ever           | Mesothelioma     | Epithelioid | 40,00       | 29,22      | 26,65      | 31,71      | 28,01      | 25,17      | 40,00      |
| 78  | Male   | Never          | Mesothelioma     | Epithelioid | 40,00       | 36,07      | 28,23      | 40,00      | 31,50      | 29,50      | 40,00      |
| 68  | Male   | Ever           | Mesothelioma     | Epithelioid | 40,00       | 32,00      | 28,00      | 33,48      | 28,44      | 25,95      | 37,90      |
| 55  | Male   | Ever           | Asbestos-exposed |             | 40,00       | 29,57      | 26,86      | 34,03      | 27,76      | 25,86      | 38,39      |
| 72  | Male   | Ever           | Asbestos-exposed |             | 40,00       | 28,71      | 26,25      | 31,34      | 26,96      | 24,95      | 38,60      |
| 69  | Male   | Never          | Asbestos-exposed |             | 40,00       | 29,02      | 26,31      | 30,10      | 27,56      | 24,67      | 35,20      |
| 43  | Male   | Ever           | Asbestos-exposed |             | 40,00       | 27,19      | 25,88      | 30,68      | 26,56      | 24,58      | 32,03      |
| 75  | Male   | Never          | Asbestos-exposed |             | 40,00       | 32,12      | 27,85      | 31,62      | 28,73      | 26,25      | 40,00      |
| 57  | Male   | Never          | Asbestos-exposed |             | 40,00       | 28,09      | 26,21      | 31,43      | 27,17      | 24,64      | 31,77      |
| 72  | Male   | Never          | Asbestos-exposed |             | 40,00       | 29,84      | 25,44      | 30,90      | 27,58      | 24,75      | 33,51      |
| 71  | Male   | Never          | Asbestos-exposed |             | 40,00       | 33,16      | 27,38      | 33,49      | 29,37      | 27,63      | 40,00      |
| 72  | Male   | Never          | Asbestos-exposed |             | 40,00       | 32,04      | 29,03      | 33,41      | 28,59      | 26,23      | 40,00      |
| 67  | Male   | Ever           | Asbestos-exposed |             | 40,00       | 27,26      | 24,77      | 29,92      | 25,96      | 23,70      | 31,72      |
| 71  | Male   | Ever           | Asbestos-exposed |             | 40,00       | 27,50      | 24,88      | 32,16      | 26,13      | 24,23      | 38,84      |
| 53  | Male   | Never          | Asbestos-exposed |             | 40,00       | 27,29      | 25,62      | 30,83      | 26,08      | 23,48      | 33,74      |
| 57  | Male   | Ever           | Asbestos-exposed |             | 40,00       | 32,17      | 26,19      | 31,86      | 28,77      | 27,47      | 40,00      |
| 79  | Male   | Ever           | Asbestos-exposed |             | 40,00       | 31,99      | 27,62      | 33,34      | 29,37      | 27,55      | 40,00      |
| 82  | Male   | Never          | Asbestos-exposed |             | 40,00       | 30,39      | 26,26      | 31,61      | 28,37      | 24,97      | 39,50      |
| 77  | Male   | Ever           | Asbestos-exposed |             | 40,00       | 36,81      | 26,65      | 32,50      | 28,63      | 26,11      | 40,00      |
| 75  | Male   | Ever           | Asbestos-exposed |             | 40,00       | 30,78      | 27,63      | 31,64      | 28,51      | 25,95      | 39,59      |
| 78  | Male   | Ever           | Asbestos-exposed |             | 40,00       | 27,89      | 26,06      | 30,47      | 26,95      | 23,88      | 32,64      |
| 81  | Male   | Ever           | Asbestos-exposed |             | 40,00       | 31,13      | 26,49      | 34,80      | 27,76      | 26,22      | 40,00      |
| 79  | Male   | Never          | Asbestos-exposed |             | 40,00       | 32,23      | 26,40      | 31,13      | 28,71      | 27,37      | 40,00      |
| 68  | Male   | Ever           | Asbestos-exposed |             | 40,00       | 40,00      | 30,36      | 40,00      | 32,29      | 29,71      | 40,00      |

| hsa-let-7g | hsa-miR-1 | hsa-miR-100 | hsa-miR-101 | hsa-miR-103 | hsa-miR-105 | hsa-miR-106a | hsa-miR-106b | hsa-miR-107 | hsa-miR-10a |
|------------|-----------|-------------|-------------|-------------|-------------|--------------|--------------|-------------|-------------|
| 28,22      | 40,00     | 40,00       | 31,17       | 34,38       | 40,00       | 23,63        | 28,87        | 40,00       | 32,43       |
| 31,84      | 40,00     | 40,00       | 40,00       | 40,00       | 40,00       | 25,44        | 33,42        | 40,00       | 40,00       |
| 27,09      | 31,46     | 33,06       | 33,40       | 29,48       | 40,00       | 21,85        | 27,24        | 40,00       | 35,78       |
| 24,76      | 33,59     | 34,93       | 30,02       | 26,83       | 40,00       | 19,74        | 26,15        | 33,26       | 40,00       |
| 26,34      | 40,00     | 40,00       | 31,12       | 29,22       | 40,00       | 21,21        | 27,57        | 34,90       | 40,00       |
| 26,71      | 40,00     | 40,00       | 31,56       | 29,20       | 40,00       | 21,76        | 27,85        | 34,50       | 40,00       |
| 28,78      | 40,00     | 33,95       | 33,50       | 31,78       | 40,00       | 23,07        | 29,67        | 40,00       | 40,00       |
| 26,39      | 33,73     | 40,00       | 29,84       | 28,62       | 40,00       | 20,77        | 25,92        | 40,00       | 32,03       |
| 23,91      | 31,07     | 30,46       | 27,48       | 24,42       | 40,00       | 18,64        | 23,64        | 30,21       | 31,33       |
| 24,05      | 30,33     | 30,18       | 27,99       | 25,41       | 40,00       | 18,40        | 23,84        | 40,00       | 31,74       |
| 26,88      | 31,90     | 33,08       | 30,09       | 31,16       | 40,00       | 20,94        | 26,10        | 40,00       | 40,00       |
| 28,06      | 40,00     | 40,00       | 29,15       | 29,23       | 40,00       | 21,74        | 26,67        | 34,84       | 33,30       |
| 25,28      | 32,71     | 32,63       | 29,03       | 27,23       | 40,00       | 19,88        | 25,09        | 34,90       | 35,62       |
| 27,74      | 38,88     | 34,49       | 28,82       | 40,00       | 40,00       | 21,19        | 26,95        | 40,00       | 33,23       |
| 28,58      | 40,00     | 40,00       | 31,22       | 30,11       | 40,00       | 22,50        | 27,64        | 40,00       | 34,58       |
| 26,70      | 33,35     | 40,00       | 31,20       | 28,32       | 40,00       | 22,04        | 26,91        | 34,35       | 35,94       |
| 28,13      | 32,92     | 35,27       | 32,85       | 29,07       | 40,00       | 22,56        | 27,60        | 40,00       | 40,00       |
| 30,43      | 40,00     | 40,00       | 40,00       | 36,03       | 40,00       | 25,46        | 30,55        | 40,00       | 40,00       |
| 26,95      | 40,00     | 33,07       | 30,98       | 28,37       | 40,00       | 22,53        | 27,65        | 32,59       | 32,56       |
| 32,82      | 40,00     | 35,34       | 40,00       | 34,86       | 40,00       | 24,21        | 29,66        | 40,00       | 32,37       |
| 28,31      | 40,00     | 34,08       | 31,97       | 29,46       | 40,00       | 23,14        | 27,90        | 40,00       | 33,27       |
| 28,25      | 32,74     | 34,11       | 40,00       | 30,27       | 40,00       | 21,98        | 27,01        | 38,56       | 31,44       |
| 28,09      | 40,00     | 33,51       | 31,04       | 28,12       | 40,00       | 21,80        | 26,48        | 34,52       | 33,60       |
| 27,12      | 33,56     | 31,61       | 29,90       | 29,16       | 40,00       | 21,48        | 25,56        | 40,00       | 31,85       |
| 26,44      | 34,28     | 30,95       | 29,98       | 26,96       | 40,00       | 20,82        | 24,98        | 34,92       | 29,88       |
| 29,10      | 40,00     | 32,01       | 31,77       | 30,20       | 40,00       | 22,84        | 27,72        | 40,00       | 31,31       |
| 27,01      | 33,52     | 31,47       | 30,06       | 28,10       | 40,00       | 20,63        | 25,10        | 40,00       | 30,42       |
| 27,28      | 34,94     | 36,46       | 30,35       | 29,74       | 40,00       | 21,35        | 26,43        | 40,00       | 32,64       |
| 28,71      | 40,00     | 32,47       | 37,49       | 31,18       | 40,00       | 23,65        | 28,11        | 40,00       | 33,35       |
| 28,69      | 40,00     | 34,31       | 31,35       | 29,42       | 40,00       | 21,64        | 26,68        | 40,00       | 35,33       |
| 26,20      | 30,25     | 30,92       | 29,29       | 28,30       | 40,00       | 20,34        | 25,26        | 33,98       | 32,14       |
| 26,09      | 35,57     | 30,08       | 29,76       | 27,76       | 40,00       | 19,91        | 25,06        | 35,50       | 30,51       |
| 25,84      | 33,82     | 34,00       | 29,56       | 26,93       | 40,00       | 20,00        | 24,48        | 34,63       | 30,35       |
| 27,72      | 33,30     | 31,90       | 31,49       | 30,79       | 40,00       | 20,99        | 25,51        | 40,00       | 32,32       |
| 29,66      | 40,00     | 40,00       | 32,34       | 31,62       | 40,00       | 22,74        | 27,20        | 40,00       | 33,16       |
| 27,70      | 34,73     | 35,05       | 30,95       | 31,19       | 40,00       | 22,30        | 26,00        | 40,00       | 32,29       |
| 28,64      | 40,00     | 32,78       | 31,65       | 31,35       | 40,00       | 21,46        | 26,60        | 40,00       | 31,75       |
| 29,05      | 40,00     | 32,46       | 31,36       | 29,46       | 40,00       | 22,80        | 26,70        | 37,10       | 30,78       |
| 26,63      | 31,79     | 31,66       | 29,99       | 28,83       | 40,00       | 20,98        | 25,59        | 35,17       | 30,97       |
| 27,92      | 34,66     | 33,75       | 40,00       | 30,35       | 40,00       | 21,34        | 25,89        | 40,00       | 32,92       |
| 28,76      | 40,00     | 31,83       | 29,69       | 32,61       | 40,00       | 22,02        | 26,53        | 40,00       | 31,20       |
| 32,08      | 40,00     | 40,00       | 34,41       | 36,35       | 40,00       | 23,75        | 28,07        | 40,00       | 38,15       |



| hsa-miR-10b | hsa-miR-122 | hsa-miR-125a-3p | hsa-miR-125a-5p | hsa-miR-125b | hsa-miR-126 | hsa-miR-127 | hsa-miR-127-5p | hsa-miR-128a |
|-------------|-------------|-----------------|-----------------|--------------|-------------|-------------|----------------|--------------|
| 40,00       | 29,88       | 40,00           | 31,29           | 40,00        | 23,08       | 40,00       | 40,00          | 32,64        |
| 40,00       | 33,09       | 40,00           | 40,00           | 40,00        | 25,77       | 30,61       | 40,00          | 40,00        |
| 40,00       | 29,17       | 40,00           | 29,18           | 40,00        | 21,60       | 28,99       | 40,00          | 30,89        |
| 40,00       | 31,12       | 40,00           | 26,63           | 34,52        | 19,58       | 28,74       | 40,00          | 28,92        |
| 40,00       | 29,23       | 40,00           | 30,28           | 31,46        | 21,52       | 28,59       | 40,00          | 30,32        |
| 40,00       | 29,72       | 40,00           | 30,54           | 40,00        | 22,12       | 29,07       | 40,00          | 31,27        |
| 40,00       | 30,18       | 40,00           | 33,60           | 40,00        | 23,82       | 31,02       | 40,00          | 32,45        |
| 40,00       | 27,03       | 40,00           | 30,44           | 31,01        | 21,32       | 27,45       | 40,00          | 29,33        |
| 40,00       | 27,59       | 32,06           | 26,22           | 28,86        | 18,94       | 23,46       | 40,00          | 27,21        |
| 40,00       | 26,67       | 31,13           | 27,99           | 28,53        | 19,23       | 26,96       | 40,00          | 27,27        |
| 40,00       | 28,48       | 40,00           | 32,65           | 31,59        | 21,64       | 29,44       | 40,00          | 29,35        |
| 40,00       | 26,41       | 40,00           | 31,72           | 32,97        | 21,87       | 27,98       | 40,00          | 31,40        |
| 40,00       | 27,76       | 33,47           | 29,50           | 31,41        | 20,42       | 27,63       | 40,00          | 28,46        |
| 40,00       | 24,74       | 40,00           | 33,19           | 30,90        | 22,31       | 30,17       | 40,00          | 30,14        |
| 40,00       | 33,12       | 40,00           | 31,51           | 40,00        | 22,91       | 29,98       | 40,00          | 30,89        |
| 40,00       | 28,53       | 40,00           | 29,92           | 40,00        | 21,95       | 30,96       | 40,00          | 31,39        |
| 40,00       | 40,00       | 40,00           | 31,57           | 31,61        | 22,66       | 30,09       | 40,00          | 30,44        |
| 40,00       | 30,81       | 40,00           | 31,49           | 33,60        | 25,43       | 40,00       | 40,00          | 32,56        |
| 40,00       | 31,53       | 40,00           | 29,70           | 32,75        | 22,27       | 29,97       | 40,00          | 30,61        |
| 40,00       | 29,82       | 40,00           | 32,98           | 35,65        | 24,64       | 31,07       | 40,00          | 32,22        |
| 40,00       | 28,35       | 40,00           | 40,00           | 31,44        | 23,18       | 29,03       | 40,00          | 30,62        |
| 37,25       | 25,80       | 40,00           | 30,81           | 33,95        | 21,94       | 28,43       | 40,00          | 30,23        |
| 40,00       | 24,69       | 40,00           | 31,32           | 31,10        | 21,74       | 29,08       | 40,00          | 31,42        |
| 35,89       | 25,36       | 33,45           | 29,18           | 31,32        | 20,48       | 27,77       | 40,00          | 29,61        |
| 31,22       | 25,03       | 40,00           | 30,48           | 28,92        | 20,50       | 28,30       | 40,00          | 29,59        |
| 36,56       | 25,64       | 40,00           | 32,15           | 30,50        | 22,62       | 30,35       | 39,55          | 32,10        |
| 30,93       | 23,90       | 40,00           | 30,07           | 30,05        | 20,57       | 28,21       | 40,00          | 29,73        |
| 40,00       | 27,04       | 32,35           | 31,07           | 29,84        | 20,89       | 26,79       | 40,00          | 29,45        |
| 40,00       | 30,93       | 40,00           | 32,34           | 34,45        | 22,66       | 28,11       | 40,00          | 32,99        |
| 34,02       | 25,04       | 40,00           | 31,10           | 31,33        | 21,05       | 28,27       | 40,00          | 30,69        |
| 35,36       | 25,97       | 34,86           | 28,92           | 29,40        | 19,26       | 26,66       | 40,00          | 28,61        |
| 32,76       | 26,33       | 34,29           | 28,20           | 30,18        | 19,26       | 26,95       | 40,00          | 29,83        |
| 38,34       | 26,60       | 40,00           | 27,78           | 31,16        | 19,04       | 26,12       | 40,00          | 29,02        |
| 31,70       | 25,77       | 40,00           | 30,88           | 30,82        | 21,23       | 26,69       | 40,00          | 30,01        |
| 36,85       | 26,80       | 40,00           | 40,00           | 32,01        | 22,91       | 29,08       | 40,00          | 31,11        |
| 39,42       | 27,32       | 33,02           | 29,60           | 31,20        | 21,30       | 26,66       | 40,00          | 29,51        |
| 38,40       | 25,65       | 35,04           | 30,02           | 31,23        | 21,35       | 29,47       | 40,00          | 31,31        |
| 36,00       | 25,36       | 34,60           | 32,54           | 30,97        | 21,94       | 27,96       | 40,00          | 32,52        |
| 35,84       | 24,47       | 31,63           | 28,73           | 28,63        | 20,01       | 29,55       | 40,00          | 28,63        |
| 37,44       | 26,00       | 33,42           | 28,24           | 31,52        | 20,98       | 26,88       | 40,00          | 29,17        |
| 34,69       | 27,03       | 40,00           | 33,09           | 29,72        | 22,07       | 28,68       | 40,00          | 30,20        |
| 37,90       | 26,12       | 40,00           | 32,83           | 33,02        | 23,49       | 30,69       | 40,00          | 32,37        |

| hsa-miR-129 | hsa-miR-130a | hsa-miR-130b | hsa-miR-132 | hsa-miR-133a | hsa-miR-133b | hsa-miR-135a | hsa-miR-135b | hsa-miR-136 | hsa-miR-138 |
|-------------|--------------|--------------|-------------|--------------|--------------|--------------|--------------|-------------|-------------|
| 40,00       | 28,69        | 29,48        | 29,98       | 28,43        | 34,48        | 40,00        | 40,00        | 40,00       | 40,00       |
| 40,00       | 34,00        | 34,64        | 33,84       | 33,11        | 40,00        | 40,00        | 40,00        | 40,00       | 40,00       |
| 40,00       | 29,19        | 29,41        | 28,72       | 27,35        | 31,20        | 40,00        | 40,00        | 40,00       | 40,00       |
| 40,00       | 26,80        | 28,98        | 27,00       | 26,74        | 33,87        | 33,79        | 36,92        | 40,00       | 40,00       |
| 40,00       | 27,32        | 29,43        | 28,61       | 30,42        | 35,84        | 40,00        | 40,00        | 40,00       | 40,00       |
| 40,00       | 27,82        | 29,13        | 29,03       | 29,99        | 34,22        | 40,00        | 40,00        | 40,00       | 32,67       |
| 40,00       | 29,88        | 30,68        | 30,66       | 31,66        | 40,00        | 40,00        | 40,00        | 40,00       | 40,00       |
| 40,00       | 24,25        | 26,16        | 27,18       | 27,55        | 32,51        | 40,00        | 40,00        | 40,00       | 40,00       |
| 40,00       | 21,73        | 24,39        | 24,76       | 26,55        | 31,89        | 31,98        | 39,01        | 37,53       | 31,34       |
| 40,00       | 22,83        | 24,39        | 25,38       | 24,32        | 29,52        | 40,00        | 32,73        | 40,00       | 31,54       |
| 40,00       | 25,35        | 26,48        | 27,31       | 26,72        | 31,86        | 40,00        | 40,00        | 40,00       | 31,92       |
| 40,00       | 26,49        | 27,56        | 29,11       | 29,71        | 36,65        | 33,83        | 40,00        | 40,00       | 40,00       |
| 40,00       | 23,65        | 25,44        | 27,30       | 28,46        | 31,34        | 32,63        | 40,00        | 40,00       | 31,50       |
| 40,00       | 25,09        | 26,16        | 26,76       | 28,08        | 32,44        | 33,76        | 40,00        | 40,00       | 33,18       |
| 40,00       | 26,60        | 29,26        | 31,16       | 30,09        | 33,91        | 40,00        | 40,00        | 40,00       | 40,00       |
| 40,00       | 26,60        | 28,36        | 29,53       | 29,46        | 32,92        | 40,00        | 40,00        | 40,00       | 40,00       |
| 40,00       | 26,52        | 28,64        | 30,71       | 29,40        | 33,39        | 40,00        | 40,00        | 40,00       | 32,63       |
| 40,00       | 29,96        | 30,34        | 35,34       | 30,91        | 40,00        | 40,00        | 40,00        | 40,00       | 40,00       |
| 40,00       | 27,50        | 29,14        | 31,72       | 28,24        | 33,43        | 40,00        | 40,00        | 40,00       | 40,00       |
| 40,00       | 28,36        | 31,29        | 32,13       | 29,39        | 34,41        | 40,00        | 40,00        | 40,00       | 40,00       |
| 40,00       | 27,82        | 29,48        | 31,22       | 30,65        | 40,00        | 40,00        | 40,00        | 40,00       | 40,00       |
| 40,00       | 28,37        | 28,67        | 27,21       | 28,64        | 32,60        | 40,00        | 40,00        | 40,00       | 32,66       |
| 40,00       | 28,21        | 29,15        | 28,38       | 30,83        | 40,00        | 40,00        | 40,00        | 40,00       | 40,00       |
| 40,00       | 25,40        | 26,67        | 26,31       | 28,95        | 32,65        | 34,73        | 40,00        | 40,00       | 40,00       |
| 40,00       | 26,48        | 27,41        | 27,04       | 28,58        | 31,23        | 32,88        | 40,00        | 38,67       | 40,00       |
| 40,00       | 29,00        | 29,46        | 28,60       | 31,04        | 40,00        | 40,00        | 40,00        | 40,00       | 40,00       |
| 40,00       | 26,66        | 27,99        | 26,96       | 29,66        | 34,03        | 33,94        | 40,00        | 40,00       | 40,00       |
| 40,00       | 25,96        | 27,23        | 26,26       | 29,02        | 32,66        | 40,00        | 40,00        | 40,00       | 32,45       |
| 40,00       | 27,66        | 30,59        | 29,77       | 29,23        | 33,20        | 40,00        | 40,00        | 40,00       | 40,00       |
| 40,00       | 27,91        | 27,92        | 27,54       | 28,28        | 32,84        | 40,00        | 40,00        | 40,00       | 40,00       |
| 40,00       | 24,56        | 25,63        | 25,69       | 25,51        | 29,01        | 40,00        | 40,00        | 40,00       | 40,00       |
| 40,00       | 25,33        | 26,95        | 26,71       | 26,13        | 28,73        | 40,00        | 40,00        | 40,00       | 30,85       |
| 40,00       | 25,42        | 26,57        | 25,94       | 26,99        | 31,22        | 40,00        | 35,38        | 40,00       | 33,45       |
| 40,00       | 27,16        | 28,64        | 26,75       | 25,98        | 29,83        | 40,00        | 40,00        | 40,00       | 40,00       |
| 40,00       | 28,87        | 30,26        | 29,75       | 30,43        | 37,72        | 40,00        | 40,00        | 40,00       | 40,00       |
| 40,00       | 25,87        | 26,98        | 27,17       | 30,09        | 34,49        | 40,00        | 40,00        | 40,00       | 32,88       |
| 40,00       | 28,17        | 28,10        | 26,78       | 27,96        | 32,18        | 40,00        | 40,00        | 40,00       | 40,00       |
| 40,00       | 26,95        | 28,68        | 28,02       | 29,32        | 32,50        | 40,00        | 40,00        | 36,72       | 31,40       |
| 40,00       | 25,28        | 26,78        | 26,15       | 26,82        | 29,91        | 40,00        | 40,00        | 40,00       | 31,71       |
| 40,00       | 27,23        | 27,65        | 26,39       | 26,10        | 30,25        | 40,00        | 39,09        | 40,00       | 33,93       |
| 40,00       | 27,34        | 29,22        | 28,54       | 28,11        | 31,99        | 40,00        | 40,00        | 38,77       | 40,00       |
| 40,00       | 28,95        | 29,78        | 28,36       | 30,19        | 40,00        | 40,00        | 40,00        | 40,00       | 40,00       |

| hsa-miR-139-3p | hsa-miR-139-5p | hsa-miR-140-3p | hsa-miR-141 | hsa-miR-142-3p | hsa-miR-142-5p | hsa-miR-143 | hsa-miR-145 | hsa-miR-146a |
|----------------|----------------|----------------|-------------|----------------|----------------|-------------|-------------|--------------|
| 33,79          | 28,32          | 31,66          | 40,00       | 27,15          | 31,51          | 30,02       | 29,05       | 21,13        |
| 40,00          | 31,31          | 34,28          | 40,00       | 29,15          | 40,00          | 40,00       | 31,99       | 24,15        |
| 29,97          | 26,96          | 31,90          | 40,00       | 25,28          | 30,37          | 30,16       | 27,21       | 20,54        |
| 27,71          | 23,97          | 28,85          | 40,00       | 23,39          | 29,50          | 30,29       | 26,96       | 19,16        |
| 29,51          | 26,12          | 30,96          | 40,00       | 25,05          | 29,74          | 30,09       | 27,80       | 20,42        |
| 31,32          | 25,76          | 31,37          | 40,00       | 25,11          | 30,96          | 31,27       | 27,97       | 21,41        |
| 31,99          | 28,44          | 32,46          | 40,00       | 28,09          | 31,34          | 34,51       | 29,92       | 22,43        |
| 40,00          | 25,72          | 29,03          | 35,20       | 24,36          | 28,39          | 26,11       | 24,87       | 20,53        |
| 28,54          | 22,98          | 27,69          | 32,95       | 20,93          | 25,56          | 25,49       | 23,94       | 18,01        |
| 28,79          | 23,53          | 26,82          | 31,51       | 22,41          | 26,80          | 27,44       | 24,64       | 18,33        |
| 31,35          | 25,50          | 28,79          | 34,51       | 25,07          | 28,49          | 30,30       | 27,96       | 20,27        |
| 32,66          | 25,88          | 31,15          | 34,36       | 25,02          | 29,98          | 29,76       | 27,26       | 21,18        |
| 28,49          | 23,45          | 29,61          | 34,02       | 22,68          | 27,89          | 29,92       | 25,98       | 20,30        |
| 29,96          | 26,17          | 29,49          | 33,66       | 27,40          | 29,71          | 29,95       | 29,28       | 20,34        |
| 33,04          | 27,11          | 30,94          | 40,00       | 25,12          | 29,72          | 29,94       | 27,94       | 21,95        |
| 34,39          | 26,13          | 31,93          | 34,55       | 23,68          | 29,57          | 30,10       | 27,05       | 22,35        |
| 32,31          | 26,37          | 31,63          | 35,04       | 23,91          | 29,88          | 29,98       | 27,44       | 22,32        |
| 34,73          | 28,76          | 32,96          | 40,00       | 27,40          | 34,58          | 32,69       | 29,59       | 24,55        |
| 30,37          | 25,85          | 32,05          | 40,00       | 24,34          | 29,67          | 32,26       | 27,00       | 22,14        |
| 34,63          | 28,51          | 32,42          | 40,00       | 27,57          | 32,95          | 32,19       | 28,10       | 23,55        |
| 40,00          | 26,64          | 32,34          | 40,00       | 24,30          | 29,21          | 31,58       | 28,17       | 23,30        |
| 30,45          | 26,82          | 33,13          | 33,04       | 25,57          | 30,48          | 31,12       | 27,02       | 21,43        |
| 31,23          | 26,91          | 33,18          | 40,00       | 24,24          | 30,84          | 29,25       | 25,89       | 22,37        |
| 29,12          | 25,15          | 31,81          | 40,00       | 23,71          | 29,00          | 31,21       | 26,70       | 19,78        |
| 39,73          | 24,96          | 31,03          | 32,82       | 22,62          | 28,92          | 28,13       | 24,96       | 21,62        |
| 32,56          | 26,82          | 34,43          | 40,00       | 25,38          | 31,90          | 30,97       | 28,27       | 22,97        |
| 31,01          | 25,68          | 31,24          | 34,32       | 23,30          | 29,12          | 30,02       | 25,92       | 20,98        |
| 34,87          | 27,16          | 31,24          | 34,87       | 24,60          | 29,04          | 29,32       | 27,15       | 20,24        |
| 40,00          | 27,81          | 33,39          | 40,00       | 26,98          | 33,37          | 29,98       | 26,34       | 22,10        |
| 31,47          | 25,14          | 31,63          | 40,00       | 25,53          | 30,41          | 30,08       | 26,62       | 20,01        |
| 31,25          | 25,08          | 30,34          | 35,58       | 22,75          | 27,91          | 27,89       | 23,96       | 18,84        |
| 40,00          | 25,75          | 29,48          | 40,00       | 23,62          | 28,90          | 26,44       | 23,50       | 21,80        |
| 29,40          | 24,55          | 30,34          | 34,00       | 22,63          | 27,86          | 27,75       | 24,59       | 19,11        |
| 30,44          | 25,26          | 31,33          | 34,51       | 26,17          | 30,09          | 27,99       | 25,94       | 19,59        |
| 34,54          | 26,83          | 33,57          | 40,00       | 26,19          | 31,43          | 30,79       | 27,56       | 22,51        |
| 29,02          | 26,24          | 33,24          | 40,00       | 24,80          | 29,48          | 28,02       | 25,27       | 20,49        |
| 33,18          | 26,02          | 31,89          | 40,00       | 26,25          | 30,93          | 28,09       | 25,41       | 19,54        |
| 32,32          | 26,44          | 34,06          | 40,00       | 24,63          | 30,68          | 31,56       | 27,65       | 21,40        |
| 29,05          | 25,01          | 30,98          | 33,39       | 23,05          | 28,10          | 27,71       | 25,44       | 18,83        |
| 28,06          | 24,94          | 32,03          | 34,40       | 25,90          | 29,85          | 29,88       | 26,27       | 19,25        |
| 37,71          | 27,11          | 32,96          | 34,57       | 25,81          | 33,37          | 29,97       | 27,35       | 22,79        |
| 32,98          | 27,77          | 34,73          | 40,00       | 29,13          | 35,20          | 31,90       | 29,09       | 21,43        |

| hsa-miR-146b | hsa-miR-146b-3p | hsa-miR-147 | hsa-miR-147b | hsa-miR-148a | hsa-miR-148b | hsa-miR-149 | hsa-miR-150 | hsa-miR-152 | hsa-miR-154 |
|--------------|-----------------|-------------|--------------|--------------|--------------|-------------|-------------|-------------|-------------|
| 26,75        | 40,00           | 40,00       | 40,00        | 30,90        | 31,13        | 40,00       | 27,31       | 29,02       | 40,00       |
| 29,49        | 40,00           | 40,00       | 40,00        | 30,94        | 32,10        | 40,00       | 28,10       | 30,89       | 40,00       |
| 25,38        | 40,00           | 40,00       | 40,00        | 29,28        | 30,17        | 40,00       | 25,22       | 28,97       | 40,00       |
| 23,22        | 40,00           | 40,00       | 40,00        | 30,36        | 30,01        | 40,00       | 25,11       | 27,62       | 40,00       |
| 25,32        | 40,00           | 40,00       | 40,00        | 29,89        | 31,05        | 40,00       | 26,45       | 28,32       | 40,00       |
| 25,74        | 40,00           | 40,00       | 40,00        | 30,43        | 30,79        | 40,00       | 25,73       | 28,54       | 40,00       |
| 27,61        | 40,00           | 40,00       | 40,00        | 32,09        | 32,07        | 40,00       | 25,71       | 29,74       | 40,00       |
| 25,17        | 40,00           | 40,00       | 40,00        | 27,25        | 30,12        | 40,00       | 23,06       | 27,18       | 37,18       |
| 22,21        | 31,02           | 40,00       | 40,00        | 25,43        | 27,84        | 40,00       | 23,36       | 24,74       | 31,83       |
| 22,58        | 40,00           | 40,00       | 40,00        | 26,10        | 28,12        | 40,00       | 21,08       | 25,58       | 34,95       |
| 25,42        | 40,00           | 40,00       | 40,00        | 28,15        | 30,00        | 40,00       | 24,09       | 26,96       | 40,00       |
| 25,98        | 40,00           | 40,00       | 40,00        | 28,01        | 31,33        | 40,00       | 26,02       | 28,16       | 40,00       |
| 24,36        | 33,58           | 40,00       | 40,00        | 26,51        | 29,00        | 40,00       | 23,99       | 26,42       | 32,98       |
| 25,55        | 37,99           | 40,00       | 40,00        | 27,94        | 30,10        | 40,00       | 24,38       | 26,90       | 40,00       |
| 26,45        | 40,00           | 40,00       | 40,00        | 29,26        | 32,49        | 40,00       | 26,85       | 29,01       | 40,00       |
| 26,15        | 40,00           | 40,00       | 40,00        | 28,63        | 30,73        | 40,00       | 27,32       | 28,05       | 40,00       |
| 25,99        | 32,75           | 40,00       | 40,00        | 28,60        | 30,50        | 40,00       | 28,44       | 28,41       | 40,00       |
| 28,26        | 40,00           | 40,00       | 40,00        | 40,00        | 35,05        | 40,00       | 26,52       | 30,29       | 40,00       |
| 25,93        | 40,00           | 40,00       | 40,00        | 29,24        | 33,31        | 40,00       | 26,14       | 29,41       | 40,00       |
| 27,60        | 40,00           | 40,00       | 40,00        | 31,92        | 32,65        | 40,00       | 26,82       | 28,24       | 40,00       |
| 27,23        | 32,44           | 40,00       | 40,00        | 29,61        | 31,80        | 40,00       | 27,73       | 29,68       | 40,00       |
| 25,96        | 40,00           | 40,00       | 40,00        | 28,87        | 31,02        | 40,00       | 24,42       | 28,67       | 34,19       |
| 26,39        | 40,00           | 40,00       | 40,00        | 29,12        | 30,66        | 40,00       | 25,21       | 28,90       | 37,57       |
| 24,74        | 40,00           | 40,00       | 40,00        | 26,97        | 29,45        | 40,00       | 23,46       | 27,08       | 40,00       |
| 25,25        | 40,00           | 40,00       | 40,00        | 27,79        | 29,56        | 40,00       | 24,38       | 27,28       | 40,00       |
| 27,02        | 40,00           | 40,00       | 40,00        | 29,26        | 31,81        | 40,00       | 24,20       | 29,81       | 40,00       |
| 24,89        | 35,54           | 40,00       | 40,00        | 27,77        | 29,86        | 40,00       | 22,92       | 27,03       | 40,00       |
| 25,04        | 40,00           | 40,00       | 40,00        | 27,88        | 29,81        | 40,00       | 24,29       | 26,59       | 39,26       |
| 26,89        | 40,00           | 40,00       | 40,00        | 30,46        | 31,30        | 40,00       | 25,50       | 28,80       | 40,00       |
| 25,16        | 38,92           | 40,00       | 40,00        | 29,30        | 29,80        | 40,00       | 25,11       | 27,54       | 39,58       |
| 23,71        | 40,00           | 40,00       | 40,00        | 27,34        | 27,99        | 40,00       | 23,78       | 25,78       | 40,00       |
| 24,41        | 33,01           | 40,00       | 40,00        | 27,14        | 28,86        | 40,00       | 24,70       | 27,79       | 35,29       |
| 23,51        | 40,00           | 40,00       | 40,00        | 26,80        | 28,78        | 40,00       | 23,68       | 26,57       | 40,00       |
| 24,58        | 33,53           | 40,00       | 40,00        | 28,45        | 29,34        | 39,65       | 23,81       | 27,26       | 40,00       |
| 27,48        | 36,39           | 40,00       | 40,00        | 30,39        | 31,51        | 40,00       | 24,26       | 28,94       | 40,00       |
| 25,29        | 40,00           | 40,00       | 40,00        | 27,98        | 28,69        | 40,00       | 24,55       | 26,35       | 38,16       |
| 25,16        | 40,00           | 40,00       | 40,00        | 28,39        | 30,14        | 40,00       | 24,55       | 27,95       | 40,00       |
| 26,35        | 40,00           | 40,00       | 40,00        | 28,46        | 30,78        | 40,00       | 24,28       | 27,84       | 40,00       |
| 24,01        | 40,00           | 40,00       | 40,00        | 27,74        | 28,40        | 40,00       | 24,05       | 25,77       | 40,00       |
| 24,82        | 40,00           | 40,00       | 40,00        | 27,70        | 29,20        | 40,00       | 24,84       | 26,27       | 38,73       |
| 26,18        | 40,00           | 40,00       | 40,00        | 29,31        | 32,29        | 40,00       | 24,42       | 28,42       | 40,00       |
| 27,34        | 40,00           | 40,00       | 40,00        | 30,30        | 31,35        | 40,00       | 25,00       | 28,58       | 40,00       |

| hsa-miR-155 | hsa-miR-15a | hsa-miR-15b | hsa-miR-16 | hsa-miR-17 | hsa-miR-181a | hsa-miR-181c | hsa-miR-182 | hsa-miR-183 | hsa-miR-184 |
|-------------|-------------|-------------|------------|------------|--------------|--------------|-------------|-------------|-------------|
| 29,44       | 40,00       | 31,95       | 24,69      | 23,57      | 32,32        | 37,45        | 33,98       | 40,00       | 40,00       |
| 32,04       | 40,00       | 33,72       | 26,30      | 25,66      | 40,00        | 40,00        | 40,00       | 40,00       | 40,00       |
| 27,61       | 40,00       | 28,34       | 23,65      | 21,51      | 31,14        | 32,49        | 35,88       | 40,00       | 40,00       |
| 25,13       | 33,21       | 25,87       | 21,57      | 19,81      | 31,29        | 38,76        | 32,24       | 40,00       | 40,00       |
| 27,03       | 31,76       | 27,87       | 22,54      | 21,11      | 31,16        | 30,65        | 40,00       | 40,00       | 40,00       |
| 27,43       | 31,68       | 28,07       | 22,85      | 21,63      | 31,51        | 33,69        | 40,00       | 40,00       | 40,00       |
| 29,87       | 35,05       | 31,80       | 24,35      | 23,08      | 35,46        | 40,00        | 40,00       | 40,00       | 40,00       |
| 27,85       | 40,00       | 27,02       | 20,20      | 20,66      | 29,23        | 34,63        | 34,34       | 40,00       | 40,00       |
| 25,28       | 29,19       | 24,15       | 18,51      | 18,47      | 26,89        | 26,91        | 34,87       | 40,00       | 40,00       |
| 26,24       | 29,10       | 24,47       | 18,38      | 18,21      | 27,85        | 34,32        | 40,00       | 37,33       | 40,00       |
| 28,77       | 32,00       | 28,11       | 20,57      | 20,81      | 30,59        | 35,75        | 40,00       | 40,00       | 40,00       |
| 29,76       | 31,97       | 27,78       | 22,15      | 21,47      | 32,06        | 33,90        | 35,23       | 40,00       | 40,00       |
| 27,45       | 30,88       | 26,21       | 20,18      | 19,92      | 28,97        | 30,05        | 40,00       | 40,00       | 33,28       |
| 28,79       | 40,00       | 30,88       | 20,82      | 21,04      | 31,50        | 40,00        | 40,00       | 36,11       | 40,00       |
| 29,49       | 40,00       | 29,05       | 23,74      | 22,70      | 32,28        | 40,00        | 40,00       | 40,00       | 40,00       |
| 28,67       | 33,90       | 27,22       | 22,48      | 22,00      | 30,85        | 40,00        | 33,89       | 40,00       | 40,00       |
| 29,23       | 40,00       | 28,48       | 23,32      | 22,66      | 31,42        | 40,00        | 40,00       | 40,00       | 40,00       |
| 32,18       | 40,00       | 33,00       | 24,99      | 25,42      | 32,97        | 40,00        | 40,00       | 40,00       | 40,00       |
| 28,61       | 32,20       | 27,90       | 22,81      | 22,53      | 31,43        | 40,00        | 36,54       | 40,00       | 40,00       |
| 31,74       | 40,00       | 32,56       | 23,84      | 24,66      | 32,98        | 33,95        | 40,00       | 40,00       | 40,00       |
| 29,88       | 36,25       | 28,46       | 23,72      | 23,07      | 32,63        | 37,03        | 40,00       | 40,00       | 40,00       |
| 29,28       | 38,70       | 27,63       | 22,53      | 21,94      | 30,51        | 32,64        | 40,00       | 40,00       | 40,00       |
| 29,85       | 37,80       | 27,04       | 21,18      | 21,63      | 31,91        | 32,06        | 40,00       | 36,33       | 40,00       |
| 28,96       | 39,05       | 26,13       | 21,77      | 21,44      | 29,37        | 30,85        | 40,00       | 40,00       | 40,00       |
| 29,62       | 33,36       | 24,81       | 21,56      | 20,73      | 30,53        | 32,59        | 40,00       | 40,00       | 33,09       |
| 30,05       | 40,00       | 28,50       | 22,56      | 22,80      | 31,65        | 34,91        | 40,00       | 40,00       | 40,00       |
| 28,80       | 34,74       | 26,05       | 20,32      | 20,55      | 30,17        | 29,61        | 36,01       | 40,00       | 40,00       |
| 30,69       | 35,89       | 26,57       | 21,58      | 21,12      | 30,31        | 30,76        | 40,00       | 40,00       | 40,00       |
| 30,33       | 40,00       | 28,49       | 24,53      | 23,64      | 30,97        | 34,30        | 40,00       | 40,00       | 40,00       |
| 29,62       | 36,36       | 26,49       | 22,94      | 21,53      | 30,89        | 33,26        | 40,00       | 40,00       | 34,20       |
| 28,12       | 37,48       | 24,65       | 20,96      | 20,11      | 28,01        | 30,41        | 40,00       | 40,00       | 32,24       |
| 28,46       | 39,79       | 25,01       | 20,93      | 19,82      | 30,52        | 32,56        | 40,00       | 38,90       | 32,15       |
| 27,40       | 37,60       | 24,31       | 20,98      | 19,76      | 29,20        | 30,56        | 33,92       | 40,00       | 40,00       |
| 28,97       | 40,00       | 26,67       | 21,53      | 20,72      | 30,64        | 31,91        | 35,55       | 39,81       | 33,48       |
| 30,57       | 34,40       | 28,11       | 22,82      | 22,58      | 31,59        | 33,74        | 40,00       | 40,00       | 40,00       |
| 29,68       | 40,00       | 26,79       | 22,76      | 22,05      | 30,78        | 32,94        | 40,00       | 40,00       | 34,08       |
| 28,88       | 40,00       | 27,92       | 22,22      | 21,42      | 30,46        | 33,94        | 40,00       | 38,03       | 40,00       |
| 30,03       | 37,80       | 27,56       | 22,92      | 22,62      | 32,09        | 33,79        | 40,00       | 37,70       | 40,00       |
| 28,78       | 37,20       | 25,75       | 21,35      | 20,98      | 29,29        | 29,81        | 40,00       | 40,00       | 28,09       |
| 29,25       | 37,75       | 26,10       | 22,18      | 21,18      | 30,24        | 31,75        | 40,00       | 40,00       | 40,00       |
| 32,12       | 40,00       | 28,06       | 21,91      | 22,25      | 32,77        | 40,00        | 36,53       | 40,00       | 40,00       |
| 30,57       | 40,00       | 30,48       | 24,17      | 23,67      | 31,51        | 34,86        | 40,00       | 40,00       | 40,00       |

| hsa-miR-185 | hsa-miR-186 | hsa-miR-188-3p | hsa-miR-18a | hsa-miR-18b | hsa-miR-190 | hsa-miR-191 | hsa-miR-192 | hsa-miR-193a-3p |
|-------------|-------------|----------------|-------------|-------------|-------------|-------------|-------------|-----------------|
| 30,60       | 26,48       | 40,00          | 33,07       | 40,00       | 40,00       | 21,36       | 30,48       | 40,00           |
| 32,63       | 30,13       | 40,00          | 39,77       | 40,00       | 40,00       | 23,95       | 35,32       | 40,00           |
| 28,46       | 25,62       | 40,00          | 30,15       | 40,00       | 40,00       | 20,01       | 29,99       | 40,00           |
| 26,93       | 23,15       | 40,00          | 30,10       | 40,00       | 40,00       | 17,49       | 29,55       | 40,00           |
| 28,49       | 24,94       | 40,00          | 29,84       | 36,07       | 40,00       | 19,21       | 30,40       | 40,00           |
| 28,24       | 25,67       | 40,00          | 30,01       | 40,00       | 40,00       | 19,90       | 30,47       | 40,00           |
| 30,00       | 27,44       | 40,00          | 31,30       | 40,00       | 40,00       | 22,23       | 30,91       | 40,00           |
| 26,10       | 24,53       | 40,00          | 30,54       | 40,00       | 40,00       | 20,99       | 28,50       | 40,00           |
| 23,94       | 21,78       | 40,00          | 25,74       | 31,12       | 35,22       | 17,71       | 26,94       | 40,00           |
| 23,97       | 22,18       | 40,00          | 27,79       | 40,00       | 33,76       | 17,96       | 26,80       | 40,00           |
| 25,92       | 24,36       | 40,00          | 30,59       | 40,00       | 40,00       | 21,19       | 28,25       | 40,00           |
| 27,26       | 24,98       | 40,00          | 29,55       | 40,00       | 33,73       | 20,89       | 28,36       | 40,00           |
| 25,60       | 23,91       | 40,00          | 27,95       | 33,38       | 32,20       | 19,30       | 28,66       | 40,00           |
| 26,87       | 25,00       | 40,00          | 30,68       | 40,00       | 40,00       | 22,18       | 27,96       | 38,90           |
| 27,25       | 26,23       | 40,00          | 32,31       | 40,00       | 40,00       | 21,57       | 30,02       | 40,00           |
| 28,22       | 25,87       | 40,00          | 29,31       | 40,00       | 40,00       | 20,73       | 30,44       | 40,00           |
| 27,82       | 25,48       | 40,00          | 31,73       | 40,00       | 40,00       | 20,98       | 30,24       | 40,00           |
| 30,22       | 28,24       | 40,00          | 36,30       | 40,00       | 40,00       | 23,32       | 32,80       | 40,00           |
| 27,95       | 25,69       | 40,00          | 30,18       | 40,00       | 40,00       | 20,15       | 30,29       | 40,00           |
| 28,72       | 27,42       | 40,00          | 31,66       | 40,00       | 40,00       | 22,95       | 30,91       | 40,00           |
| 28,22       | 26,18       | 40,00          | 29,67       | 37,69       | 33,37       | 21,41       | 30,09       | 40,00           |
| 28,07       | 25,43       | 40,00          | 28,77       | 37,89       | 40,00       | 22,20       | 29,14       | 40,00           |
| 28,15       | 26,15       | 40,00          | 28,37       | 38,36       | 40,00       | 22,10       | 28,27       | 40,00           |
| 27,21       | 24,74       | 40,00          | 28,73       | 36,97       | 40,00       | 21,04       | 28,25       | 40,00           |
| 26,48       | 25,58       | 40,00          | 27,31       | 33,05       | 33,69       | 20,91       | 28,31       | 40,00           |
| 30,04       | 27,11       | 40,00          | 30,19       | 40,00       | 40,00       | 23,74       | 29,46       | 40,00           |
| 26,99       | 25,25       | 40,00          | 27,62       | 33,35       | 40,00       | 21,23       | 26,63       | 40,00           |
| 27,27       | 26,33       | 40,00          | 29,03       | 35,28       | 40,00       | 21,76       | 28,68       | 40,00           |
| 29,64       | 27,18       | 40,00          | 31,01       | 40,00       | 40,00       | 23,21       | 31,86       | 40,00           |
| 28,00       | 24,90       | 40,00          | 29,64       | 37,48       | 40,00       | 20,85       | 28,31       | 40,00           |
| 26,03       | 24,16       | 40,00          | 27,32       | 33,75       | 40,00       | 20,11       | 28,20       | 40,00           |
| 26,14       | 24,93       | 40,00          | 27,14       | 34,28       | 40,00       | 20,31       | 27,89       | 40,00           |
| 26,11       | 23,21       | 40,00          | 27,52       | 32,45       | 34,46       | 19,36       | 27,80       | 40,00           |
| 26,97       | 24,28       | 40,00          | 28,76       | 34,68       | 40,00       | 20,41       | 27,48       | 40,00           |
| 29,07       | 26,54       | 40,00          | 31,17       | 33,45       | 40,00       | 22,92       | 28,98       | 40,00           |
| 27,21       | 25,24       | 40,00          | 29,43       | 40,00       | 40,00       | 21,65       | 28,64       | 40,00           |
| 27,62       | 25,08       | 40,00          | 29,74       | 37,48       | 40,00       | 20,97       | 28,64       | 40,00           |
| 27,94       | 26,31       | 40,00          | 29,45       | 40,00       | 40,00       | 22,23       | 29,64       | 40,00           |
| 26,84       | 24,27       | 40,00          | 28,11       | 36,02       | 33,47       | 20,46       | 28,07       | 40,00           |
| 26,89       | 23,93       | 40,00          | 30,09       | 38,19       | 40,00       | 20,70       | 28,36       | 40,00           |
| 27,93       | 26,85       | 40,00          | 29,30       | 33,45       | 40,00       | 22,90       | 28,98       | 40,00           |
| 29,64       | 27,25       | 40,00          | 31,37       | 40,00       | 40,00       | 24,25       | 29,63       | 40,00           |

| hsa-miR-193a-5p | hsa-miR-193b | hsa-miR-194 | hsa-miR-195 | hsa-miR-196b | hsa-miR-197 | hsa-miR-198 | hsa-miR-199a | hsa-miR-199a-3p |
|-----------------|--------------|-------------|-------------|--------------|-------------|-------------|--------------|-----------------|
| 35,78           | 32,99        | 40,00       | 30,50       | 40,00        | 26,18       | 40,00       | 40,00        | 26,40           |
| 35,63           | 40,00        | 40,00       | 32,14       | 33,30        | 29,60       | 40,00       | 40,00        | 29,67           |
| 33,25           | 32,66        | 32,46       | 29,65       | 33,22        | 25,13       | 40,00       | 33,90        | 25,07           |
| 31,40           | 40,00        | 31,88       | 26,88       | 30,62        | 23,78       | 40,00       | 31,36        | 23,24           |
| 31,18           | 35,14        | 40,00       | 28,54       | 40,00        | 25,21       | 40,00       | 40,00        | 24,79           |
| 31,89           | 35,75        | 32,28       | 28,48       | 40,00        | 26,22       | 40,00       | 40,00        | 25,56           |
| 32,58           | 33,76        | 40,00       | 29,76       | 40,00        | 27,65       | 40,00       | 40,00        | 27,56           |
| 29,62           | 30,51        | 32,47       | 26,25       | 34,84        | 25,19       | 40,00       | 30,85        | 24,83           |
| 30,23           | 30,74        | 28,79       | 24,33       | 30,95        | 22,67       | 40,00       | 30,02        | 23,98           |
| 29,73           | 30,10        | 30,66       | 24,19       | 31,49        | 23,62       | 40,00       | 29,20        | 22,27           |
| 32,78           | 31,92        | 33,42       | 26,45       | 40,00        | 25,33       | 40,00       | 33,75        | 24,46           |
| 30,93           | 29,52        | 32,68       | 28,36       | 40,00        | 25,96       | 40,00       | 40,00        | 25,69           |
| 31,05           | 30,74        | 30,71       | 26,63       | 30,59        | 23,92       | 40,00       | 30,76        | 24,13           |
| 28,83           | 29,46        | 29,20       | 26,90       | 40,00        | 25,72       | 40,00       | 31,99        | 26,59           |
| 33,47           | 40,00        | 40,00       | 29,30       | 40,00        | 27,23       | 40,00       | 35,28        | 26,68           |
| 36,41           | 30,09        | 35,27       | 27,87       | 35,01        | 26,68       | 40,00       | 33,59        | 25,97           |
| 35,68           | 34,62        | 33,55       | 28,78       | 40,00        | 27,17       | 40,00       | 40,00        | 26,27           |
| 37,02           | 40,00        | 40,00       | 31,50       | 40,00        | 28,14       | 40,00       | 40,00        | 29,47           |
| 35,80           | 30,94        | 40,00       | 28,83       | 40,00        | 25,85       | 40,00       | 33,46        | 26,11           |
| 36,01           | 33,99        | 40,00       | 29,76       | 40,00        | 27,39       | 40,00       | 40,00        | 28,84           |
| 33,55           | 31,02        | 32,72       | 29,09       | 33,54        | 26,72       | 40,00       | 33,66        | 27,39           |
| 29,79           | 29,90        | 40,00       | 27,63       | 33,88        | 25,69       | 40,00       | 36,41        | 25,73           |
| 29,46           | 31,36        | 31,32       | 27,37       | 33,43        | 26,69       | 40,00       | 32,30        | 25,59           |
| 28,67           | 29,37        | 31,72       | 27,58       | 34,41        | 24,53       | 40,00       | 31,93        | 23,91           |
| 28,14           | 28,94        | 31,07       | 26,69       | 33,80        | 25,08       | 40,00       | 31,58        | 23,71           |
| 30,54           | 30,36        | 31,99       | 27,96       | 40,00        | 27,67       | 40,00       | 40,00        | 25,87           |
| 27,28           | 27,39        | 31,36       | 25,88       | 40,00        | 25,27       | 40,00       | 31,04        | 23,83           |
| 29,46           | 30,27        | 40,00       | 26,94       | 40,00        | 25,08       | 40,00       | 32,58        | 23,93           |
| 30,58           | 31,18        | 33,52       | 29,23       | 32,67        | 26,74       | 40,00       | 40,00        | 26,83           |
| 29,78           | 28,73        | 31,87       | 28,19       | 33,66        | 25,59       | 40,00       | 33,06        | 25,66           |
| 29,67           | 29,92        | 30,78       | 26,29       | 32,96        | 24,72       | 40,00       | 31,37        | 23,38           |
| 30,03           | 30,33        | 30,84       | 25,98       | 31,16        | 25,51       | 37,16       | 29,86        | 23,53           |
| 29,46           | 28,61        | 30,18       | 26,39       | 31,39        | 23,75       | 40,00       | 31,08        | 23,46           |
| 29,82           | 29,36        | 30,79       | 26,90       | 40,00        | 24,59       | 40,00       | 35,04        | 26,94           |
| 30,16           | 30,37        | 34,04       | 28,75       | 40,00        | 26,20       | 40,00       | 35,91        | 26,09           |
| 29,45           | 30,99        | 31,01       | 27,97       | 31,96        | 24,43       | 40,00       | 33,63        | 24,53           |
| 30,29           | 31,11        | 31,82       | 27,81       | 33,69        | 24,59       | 40,00       | 34,97        | 24,77           |
| 28,98           | 29,62        | 32,66       | 28,24       | 33,58        | 26,04       | 40,00       | 31,96        | 26,13           |
| 28,35           | 29,10        | 30,62       | 27,24       | 34,91        | 24,03       | 40,00       | 30,25        | 23,64           |
| 30,94           | 30,11        | 32,26       | 27,59       | 33,68        | 23,54       | 40,00       | 34,24        | 24,64           |
| 30,26           | 29,94        | 32,20       | 26,49       | 40,00        | 26,21       | 40,00       | 32,93        | 25,62           |
| 30,50           | 31,26        | 34,50       | 29,53       | 40,00        | 27,05       | 40,00       | 32,46        | 28,40           |

| hsa-miR-199b | hsa-miR-19a | hsa-miR-19b | hsa-miR-200a | hsa-miR-200b | hsa-miR-200c | hsa-miR-202 | hsa-miR-203 | hsa-miR-204 | hsa-miR-205 |
|--------------|-------------|-------------|--------------|--------------|--------------|-------------|-------------|-------------|-------------|
| 40,00        | 26,99       | 22,40       | 40,00        | 40,00        | 33,20        | 40,00       | 40,00       | 40,00       | 40,00       |
| 40,00        | 29,89       | 25,06       | 40,00        | 40,00        | 40,00        | 40,00       | 40,00       | 40,00       | 40,00       |
| 35,29        | 25,31       | 20,54       | 40,00        | 31,84        | 33,32        | 40,00       | 40,00       | 40,00       | 40,00       |
| 34,30        | 24,54       | 19,34       | 34,14        | 35,71        | 29,96        | 40,00       | 40,00       | 32,95       | 40,00       |
| 40,00        | 25,84       | 21,01       | 40,00        | 40,00        | 30,13        | 40,00       | 40,00       | 40,00       | 40,00       |
| 37,43        | 26,60       | 21,61       | 40,00        | 40,00        | 31,98        | 40,00       | 40,00       | 31,18       | 40,00       |
| 40,00        | 27,36       | 22,55       | 40,00        | 40,00        | 40,00        | 40,00       | 40,00       | 34,37       | 40,00       |
| 32,27        | 27,02       | 21,66       | 40,00        | 36,65        | 31,45        | 40,00       | 30,08       | 33,29       | 40,00       |
| 32,29        | 23,54       | 18,92       | 40,00        | 33,76        | 27,97        | 40,00       | 40,00       | 28,21       | 40,00       |
| 32,01        | 24,23       | 19,13       | 32,87        | 33,31        | 29,90        | 40,00       | 30,23       | 29,30       | 32,34       |
| 33,89        | 25,89       | 21,28       | 40,00        | 37,83        | 33,31        | 35,44       | 40,00       | 33,69       | 40,00       |
| 32,96        | 25,95       | 21,19       | 40,00        | 40,00        | 33,75        | 40,00       | 40,00       | 40,00       | 40,00       |
| 33,30        | 25,31       | 20,77       | 32,82        | 33,95        | 29,37        | 40,00       | 40,00       | 32,08       | 40,00       |
| 40,00        | 26,14       | 21,36       | 40,00        | 40,00        | 40,00        | 40,00       | 33,21       | 32,40       | 40,00       |
| 37,59        | 27,40       | 22,17       | 40,00        | 40,00        | 34,05        | 40,00       | 32,95       | 34,52       | 40,00       |
| 35,22        | 27,24       | 22,17       | 40,00        | 40,00        | 32,27        | 40,00       | 40,00       | 30,51       | 40,00       |
| 31,99        | 27,35       | 21,88       | 40,00        | 40,00        | 31,69        | 40,00       | 40,00       | 33,82       | 40,00       |
| 40,00        | 29,68       | 24,90       | 40,00        | 40,00        | 40,00        | 40,00       | 40,00       | 40,00       | 40,00       |
| 35,34        | 27,87       | 22,32       | 40,00        | 40,00        | 32,36        | 40,00       | 40,00       | 33,53       | 33,03       |
| 40,00        | 29,62       | 24,32       | 40,00        | 40,00        | 40,00        | 40,00       | 40,00       | 33,38       | 40,00       |
| 40,00        | 27,20       | 22,34       | 40,00        | 40,00        | 33,93        | 40,00       | 33,48       | 33,68       | 40,00       |
| 35,47        | 26,69       | 21,44       | 39,77        | 36,22        | 35,87        | 40,00       | 40,00       | 32,12       | 40,00       |
| 35,70        | 27,01       | 20,99       | 40,00        | 40,00        | 33,29        | 32,85       | 34,17       | 31,12       | 40,00       |
| 35,62        | 25,90       | 20,14       | 40,00        | 36,18        | 31,82        | 40,00       | 40,00       | 29,41       | 40,00       |
| 32,28        | 25,59       | 20,21       | 33,10        | 33,32        | 30,63        | 37,20       | 31,34       | 30,87       | 33,23       |
| 40,00        | 27,63       | 22,20       | 40,00        | 40,00        | 32,86        | 40,00       | 40,00       | 33,70       | 40,00       |
| 32,47        | 25,08       | 19,79       | 40,00        | 38,52        | 31,68        | 36,84       | 40,00       | 28,88       | 40,00       |
| 35,00        | 25,97       | 20,64       | 40,00        | 36,52        | 31,57        | 38,78       | 32,38       | 30,98       | 40,00       |
| 40,00        | 28,08       | 22,77       | 40,00        | 39,56        | 40,00        | 33,38       | 40,00       | 36,33       | 40,00       |
| 40,00        | 27,00       | 21,01       | 36,01        | 35,63        | 31,44        | 31,83       | 40,00       | 33,85       | 40,00       |
| 32,69        | 24,50       | 19,12       | 40,00        | 33,25        | 29,61        | 40,00       | 31,57       | 30,81       | 40,00       |
| 32,76        | 25,05       | 19,65       | 38,36        | 34,43        | 29,53        | 34,90       | 40,00       | 29,68       | 33,27       |
| 32,97        | 24,93       | 19,33       | 40,00        | 33,98        | 28,99        | 40,00       | 34,47       | 28,02       | 40,00       |
| 40,00        | 25,95       | 20,38       | 40,00        | 35,03        | 31,43        | 40,00       | 40,00       | 31,41       | 32,65       |
| 40,00        | 28,03       | 22,06       | 40,00        | 40,00        | 36,20        | 38,97       | 31,56       | 36,02       | 40,00       |
| 34,61        | 27,13       | 21,33       | 37,88        | 34,90        | 35,80        | 39,46       | 34,53       | 35,71       | 40,00       |
| 37,76        | 26,60       | 20,82       | 39,33        | 36,29        | 32,27        | 40,00       | 40,00       | 32,85       | 40,00       |
| 34,34        | 27,61       | 21,64       | 38,88        | 40,00        | 32,52        | 35,79       | 40,00       | 31,88       | 40,00       |
| 33,49        | 25,46       | 19,78       | 40,00        | 35,47        | 30,39        | 37,86       | 32,73       | 31,54       | 40,00       |
| 37,45        | 25,98       | 19,98       | 36,48        | 34,94        | 33,74        | 39,15       | 31,64       | 36,96       | 40,00       |
| 34,81        | 27,21       | 21,69       | 40,00        | 37,42        | 34,13        | 30,70       | 33,91       | 30,74       | 35,25       |
| 39,44        | 29,01       | 22,89       | 40,00        | 40,00        | 37,08        | 40,00       | 32,09       | 29,87       | 33,12       |



| hsa-miR-208 | hsa-miR-208b | hsa-miR-20a | hsa-miR-20b | hsa-miR-21 | hsa-miR-210 | hsa-miR-211 | hsa-miR-212 | hsa-miR-214 | hsa-miR-215 |
|-------------|--------------|-------------|-------------|------------|-------------|-------------|-------------|-------------|-------------|
| 40,00       | 40,00        | 24,95       | 27,42       | 27,41      | 32,18       | 40,00       | 36,39       | 40,00       | 40,00       |
| 40,00       | 40,00        | 27,28       | 29,49       | 29,07      | 34,46       | 40,00       | 40,00       | 37,03       | 40,00       |
| 40,00       | 40,00        | 22,77       | 25,36       | 25,93      | 31,29       | 40,00       | 34,14       | 40,00       | 34,71       |
| 40,00       | 40,00        | 21,10       | 23,57       | 24,98      | 29,74       | 35,36       | 31,74       | 40,00       | 40,00       |
| 40,00       | 40,00        | 22,45       | 25,06       | 25,53      | 32,60       | 40,00       | 32,78       | 37,32       | 40,00       |
| 40,00       | 40,00        | 23,24       | 25,46       | 26,68      | 32,97       | 40,00       | 34,12       | 40,00       | 34,51       |
| 40,00       | 40,00        | 24,14       | 26,47       | 26,84      | 40,00       | 40,00       | 40,00       | 35,82       | 40,00       |
| 40,00       | 40,00        | 22,07       | 25,02       | 24,67      | 29,45       | 33,41       | 34,44       | 31,62       | 40,00       |
| 40,00       | 40,00        | 19,83       | 22,44       | 21,98      | 26,51       | 40,00       | 30,86       | 31,48       | 32,02       |
| 40,00       | 40,00        | 19,45       | 22,75       | 22,73      | 27,43       | 33,85       | 30,88       | 31,33       | 40,00       |
| 40,00       | 40,00        | 21,87       | 24,92       | 24,20      | 30,86       | 32,56       | 40,00       | 33,53       | 40,00       |
| 40,00       | 40,00        | 22,82       | 25,96       | 24,60      | 40,00       | 40,00       | 32,60       | 40,00       | 40,00       |
| 40,00       | 40,00        | 20,99       | 23,92       | 22,86      | 29,89       | 40,00       | 31,75       | 33,51       | 32,94       |
| 40,00       | 40,00        | 21,85       | 25,16       | 24,26      | 32,91       | 40,00       | 32,46       | 33,82       | 34,36       |
| 40,00       | 40,00        | 23,96       | 27,05       | 25,89      | 33,08       | 40,00       | 40,00       | 37,45       | 40,00       |
| 40,00       | 40,00        | 22,94       | 26,00       | 24,89      | 40,00       | 40,00       | 34,62       | 36,72       | 40,00       |
| 40,00       | 40,00        | 23,99       | 26,90       | 25,47      | 40,00       | 40,00       | 40,00       | 40,00       | 40,00       |
| 40,00       | 40,00        | 26,83       | 29,63       | 28,94      | 40,00       | 33,91       | 40,00       | 40,00       | 40,00       |
| 40,00       | 40,00        | 24,57       | 26,81       | 25,48      | 40,00       | 40,00       | 33,04       | 35,53       | 40,00       |
| 40,00       | 40,00        | 26,75       | 28,91       | 27,38      | 38,45       | 40,00       | 40,00       | 38,35       | 32,87       |
| 40,00       | 40,00        | 24,12       | 26,58       | 25,75      | 36,15       | 40,00       | 31,87       | 40,00       | 35,67       |
| 40,00       | 40,00        | 23,46       | 25,70       | 24,64      | 33,60       | 39,02       | 31,12       | 35,20       | 32,71       |
| 40,00       | 40,00        | 22,93       | 25,51       | 24,71      | 36,68       | 40,00       | 33,52       | 33,81       | 32,28       |
| 40,00       | 40,00        | 23,39       | 25,86       | 23,51      | 33,55       | 40,00       | 40,00       | 32,66       | 32,79       |
| 40,00       | 40,00        | 21,85       | 24,50       | 23,07      | 31,50       | 33,85       | 32,68       | 32,09       | 30,91       |
| 40,00       | 40,00        | 23,77       | 26,49       | 25,81      | 39,95       | 37,19       | 35,90       | 38,44       | 40,00       |
| 40,00       | 40,00        | 21,72       | 24,04       | 23,69      | 31,73       | 40,00       | 40,00       | 32,40       | 32,94       |
| 40,00       | 40,00        | 22,55       | 25,09       | 23,33      | 32,01       | 40,00       | 33,07       | 35,05       | 40,00       |
| 40,00       | 40,00        | 25,28       | 27,22       | 25,99      | 38,64       | 38,70       | 40,00       | 40,00       | 40,00       |
| 40,00       | 40,00        | 24,18       | 25,98       | 25,09      | 31,00       | 38,79       | 35,47       | 33,69       | 37,69       |
| 40,00       | 40,00        | 21,92       | 24,54       | 22,76      | 29,57       | 40,00       | 30,84       | 36,12       | 33,92       |
| 40,00       | 40,00        | 21,07       | 23,51       | 23,64      | 30,05       | 35,31       | 33,56       | 32,46       | 31,22       |
| 40,00       | 40,00        | 22,04       | 24,30       | 23,17      | 29,22       | 39,18       | 36,55       | 33,39       | 33,52       |
| 40,00       | 40,00        | 22,88       | 25,14       | 24,82      | 32,34       | 33,07       | 35,95       | 32,01       | 33,88       |
| 40,00       | 40,00        | 24,21       | 26,33       | 25,68      | 35,89       | 31,82       | 40,00       | 40,00       | 30,26       |
| 40,00       | 40,00        | 23,94       | 26,04       | 23,83      | 32,40       | 40,00       | 31,80       | 34,17       | 38,58       |
| 40,00       | 32,42        | 23,85       | 25,51       | 24,98      | 31,38       | 40,00       | 33,15       | 37,80       | 34,69       |
| 40,00       | 40,00        | 25,07       | 27,05       | 24,40      | 33,89       | 40,00       | 38,01       | 34,42       | 36,18       |
| 40,00       | 40,00        | 22,96       | 25,29       | 22,64      | 28,44       | 40,00       | 33,32       | 33,51       | 35,13       |
| 40,00       | 40,00        | 23,96       | 25,83       | 24,46      | 31,08       | 38,25       | 31,35       | 32,46       | 36,72       |
| 40,00       | 40,00        | 22,76       | 25,86       | 24,97      | 36,05       | 31,76       | 34,45       | 33,31       | 32,68       |
| 40,00       | 40,00        | 26,53       | 28,23       | 26,29      | 37,89       | 40,00       | 40,00       | 34,58       | 40,00       |

| hsa-miR-216a | hsa-miR-216b | hsa-miR-217 | hsa-miR-218 | hsa-miR-219 | hsa-miR-219-1-3p | hsa-miR-219-2-3p | hsa-miR-22 | hsa-miR-220 |
|--------------|--------------|-------------|-------------|-------------|------------------|------------------|------------|-------------|
| 40,00        | 40,00        | 40,00       | 40,00       | 40,00       | 40,00            | 40,00            | 40,00      | 40,00       |
| 40,00        | 40,00        | 40,00       | 40,00       | 40,00       | 40,00            | 40,00            | 40,00      | 40,00       |
| 40,00        | 40,00        | 40,00       | 40,00       | 40,00       | 40,00            | 40,00            | 40,00      | 40,00       |
| 40,00        | 40,00        | 40,00       | 40,00       | 33,18       | 40,00            | 40,00            | 40,00      | 40,00       |
| 40,00        | 40,00        | 40,00       | 40,00       | 40,00       | 40,00            | 40,00            | 40,00      | 40,00       |
| 40,00        | 40,00        | 40,00       | 40,00       | 40,00       | 40,00            | 40,00            | 40,00      | 40,00       |
| 40,00        | 40,00        | 40,00       | 40,00       | 40,00       | 40,00            | 40,00            | 40,00      | 40,00       |
| 40,00        | 40,00        | 40,00       | 33,62       | 40,00       | 40,00            | 40,00            | 29,08      | 40,00       |
| 40,00        | 40,00        | 40,00       | 40,00       | 40,00       | 40,00            | 40,00            | 25,43      | 40,00       |
| 40,00        | 40,00        | 40,00       | 40,00       | 40,00       | 40,00            | 40,00            | 25,89      | 40,00       |
| 40,00        | 40,00        | 40,00       | 40,00       | 40,00       | 40,00            | 40,00            | 29,12      | 40,00       |
| 40,00        | 40,00        | 40,00       | 33,39       | 40,00       | 40,00            | 40,00            | 40,00      | 40,00       |
| 40,00        | 40,00        | 40,00       | 40,00       | 40,00       | 40,00            | 40,00            | 28,29      | 40,00       |
| 40,00        | 40,00        | 40,00       | 40,00       | 40,00       | 40,00            | 40,00            | 28,71      | 40,00       |
| 40,00        | 40,00        | 40,00       | 40,00       | 40,00       | 35,69            | 40,00            | 40,00      | 40,00       |
| 40,00        | 40,00        | 40,00       | 40,00       | 40,00       | 40,00            | 40,00            | 40,00      | 40,00       |
| 40,00        | 40,00        | 40,00       | 40,00       | 40,00       | 40,00            | 40,00            | 40,00      | 40,00       |
| 40,00        | 40,00        | 40,00       | 40,00       | 40,00       | 40,00            | 40,00            | 40,00      | 40,00       |
| 40,00        | 40,00        | 40,00       | 33,48       | 40,00       | 40,00            | 40,00            | 40,00      | 40,00       |
| 40,00        | 40,00        | 40,00       | 34,38       | 40,00       | 40,00            | 40,00            | 40,00      | 40,00       |
| 40,00        | 40,00        | 40,00       | 40,00       | 40,00       | 40,00            | 40,00            | 39,55      | 40,00       |
| 40,00        | 40,00        | 40,00       | 40,00       | 40,00       | 40,00            | 40,00            | 32,23      | 40,00       |
| 40,00        | 40,00        | 40,00       | 31,89       | 40,00       | 40,00            | 40,00            | 32,31      | 40,00       |
| 40,00        | 40,00        | 40,00       | 30,39       | 40,00       | 40,00            | 40,00            | 28,89      | 40,00       |
| 40,00        | 40,00        | 40,00       | 32,99       | 40,00       | 40,00            | 40,00            | 26,80      | 40,00       |
| 40,00        | 40,00        | 40,00       | 40,00       | 40,00       | 40,00            | 40,00            | 35,10      | 40,00       |
| 40,00        | 40,00        | 40,00       | 33,25       | 40,00       | 40,00            | 40,00            | 28,32      | 40,00       |
| 40,00        | 40,00        | 40,00       | 33,95       | 40,00       | 40,00            | 40,00            | 27,64      | 40,00       |
| 40,00        | 40,00        | 40,00       | 40,00       | 40,00       | 40,00            | 40,00            | 30,42      | 40,00       |
| 40,00        | 34,87        | 40,00       | 40,00       | 40,00       | 40,00            | 40,00            | 29,36      | 40,00       |
| 40,00        | 40,00        | 40,00       | 40,00       | 40,00       | 40,00            | 40,00            | 26,16      | 40,00       |
| 40,00        | 40,00        | 40,00       | 40,00       | 40,00       | 40,00            | 40,00            | 25,76      | 40,00       |
| 40,00        | 40,00        | 40,00       | 40,00       | 40,00       | 40,00            | 40,00            | 28,21      | 40,00       |
| 40,00        | 40,00        | 40,00       | 32,64       | 40,00       | 40,00            | 40,00            | 28,29      | 40,00       |
| 40,00        | 40,00        | 40,00       | 33,38       | 40,00       | 40,00            | 40,00            | 34,49      | 40,00       |
| 40,00        | 40,00        | 40,00       | 40,00       | 40,00       | 40,00            | 40,00            | 29,96      | 40,00       |
| 40,00        | 40,00        | 40,00       | 34,09       | 40,00       | 40,00            | 40,00            | 31,13      | 40,00       |
| 40,00        | 40,00        | 40,00       | 33,26       | 40,00       | 40,00            | 40,00            | 31,99      | 40,00       |
| 40,00        | 35,32        | 40,00       | 33,77       | 40,00       | 40,00            | 40,00            | 28,94      | 40,00       |
| 40,00        | 40,00        | 40,00       | 34,28       | 40,00       | 40,00            | 40,00            | 28,74      | 40,00       |
| 40,00        | 40,00        | 40,00       | 40,00       | 40,00       | 40,00            | 40,00            | 30,91      | 40,00       |
| 40,00        | 40,00        | 40,00       | 40,00       | 40,00       | 40,00            | 40,00            | 34,15      | 40,00       |

| hsa-miR-220b | hsa-miR-220c | hsa-miR-221 | hsa-miR-222 | hsa-miR-223 | hsa-miR-224 | hsa-miR-23a | hsa-miR-23b | hsa-miR-24 | hsa-miR-25 |
|--------------|--------------|-------------|-------------|-------------|-------------|-------------|-------------|------------|------------|
| 40,00        | 40,00        | 27,58       | 23,24       | 19,03       | 33,26       | 36,49       | 40,00       | 21,50      | 29,28      |
| 40,00        | 40,00        | 28,97       | 25,44       | 21,49       | 40,00       | 40,00       | 40,00       | 24,97      | 31,48      |
| 40,00        | 40,00        | 25,83       | 22,22       | 17,02       | 34,42       | 40,00       | 40,00       | 21,43      | 28,14      |
| 40,00        | 40,00        | 23,49       | 20,80       | 15,00       | 30,52       | 32,44       | 40,00       | 19,34      | 26,03      |
| 40,00        | 40,00        | 24,17       | 21,47       | 16,94       | 30,72       | 33,70       | 40,00       | 21,39      | 27,04      |
| 40,00        | 40,00        | 24,68       | 23,02       | 17,21       | 30,83       | 32,23       | 40,00       | 22,10      | 27,61      |
| 40,00        | 40,00        | 26,39       | 23,60       | 19,27       | 32,23       | 33,78       | 40,00       | 23,65      | 28,36      |
| 40,00        | 40,00        | 24,89       | 21,61       | 16,86       | 29,43       | 30,36       | 40,00       | 21,43      | 24,49      |
| 40,00        | 40,00        | 21,97       | 19,15       | 14,21       | 32,16       | 27,62       | 40,00       | 19,28      | 22,90      |
| 40,00        | 40,00        | 22,23       | 19,81       | 14,38       | 28,08       | 27,67       | 40,00       | 19,12      | 22,74      |
| 40,00        | 40,00        | 24,29       | 22,05       | 17,13       | 30,08       | 30,53       | 40,00       | 21,49      | 25,18      |
| 40,00        | 40,00        | 25,40       | 22,73       | 17,60       | 34,49       | 33,09       | 40,00       | 22,63      | 26,95      |
| 40,00        | 40,00        | 23,67       | 21,62       | 16,13       | 28,84       | 30,41       | 40,00       | 20,63      | 24,67      |
| 40,00        | 40,00        | 25,10       | 22,16       | 17,78       | 30,78       | 33,47       | 40,00       | 22,14      | 25,41      |
| 40,00        | 40,00        | 25,78       | 23,52       | 18,18       | 30,14       | 33,34       | 40,00       | 22,72      | 27,64      |
| 40,00        | 40,00        | 25,15       | 23,59       | 17,86       | 29,96       | 32,07       | 40,00       | 22,66      | 26,91      |
| 40,00        | 40,00        | 25,40       | 23,28       | 18,00       | 30,43       | 33,35       | 40,00       | 22,86      | 27,51      |
| 40,00        | 40,00        | 28,55       | 26,01       | 20,54       | 40,00       | 40,00       | 40,00       | 25,34      | 29,26      |
| 40,00        | 40,00        | 26,04       | 23,25       | 17,83       | 31,94       | 33,17       | 40,00       | 23,33      | 28,10      |
| 40,00        | 40,00        | 27,52       | 25,03       | 20,08       | 40,00       | 34,50       | 40,00       | 25,77      | 27,84      |
| 40,00        | 40,00        | 26,18       | 23,85       | 18,02       | 40,00       | 34,43       | 40,00       | 24,02      | 28,20      |
| 40,00        | 40,00        | 24,63       | 23,03       | 17,38       | 30,81       | 37,57       | 40,00       | 21,42      | 25,85      |
| 40,00        | 40,00        | 25,03       | 23,58       | 17,71       | 29,92       | 34,15       | 40,00       | 21,90      | 24,96      |
| 40,00        | 40,00        | 23,82       | 21,79       | 16,34       | 27,43       | 32,63       | 40,00       | 20,24      | 24,75      |
| 40,00        | 40,00        | 22,95       | 22,19       | 16,18       | 28,86       | 34,29       | 40,00       | 20,00      | 24,63      |
| 40,00        | 40,00        | 25,57       | 24,12       | 18,47       | 32,17       | 36,10       | 40,00       | 22,29      | 26,01      |
| 40,00        | 40,00        | 23,55       | 22,15       | 16,33       | 27,67       | 36,74       | 40,00       | 20,56      | 24,09      |
| 40,00        | 40,00        | 23,30       | 22,32       | 16,09       | 27,92       | 36,95       | 40,00       | 20,08      | 24,90      |
| 40,00        | 40,00        | 26,02       | 24,07       | 18,77       | 40,00       | 36,45       | 40,00       | 22,36      | 27,94      |
| 40,00        | 40,00        | 25,46       | 22,60       | 16,74       | 30,23       | 40,00       | 40,00       | 20,54      | 26,46      |
| 40,00        | 40,00        | 23,07       | 21,14       | 15,35       | 26,93       | 33,97       | 40,00       | 19,37      | 23,98      |
| 40,00        | 40,00        | 23,49       | 21,32       | 15,62       | 29,87       | 32,67       | 38,40       | 19,05      | 24,83      |
| 40,00        | 40,00        | 23,32       | 21,00       | 14,96       | 28,77       | 34,13       | 40,00       | 19,20      | 24,97      |
| 40,00        | 40,00        | 23,87       | 21,94       | 15,87       | 30,11       | 35,77       | 40,00       | 20,06      | 24,96      |
| 40,00        | 40,00        | 25,99       | 24,21       | 18,30       | 30,94       | 36,89       | 40,00       | 22,25      | 26,19      |
| 40,00        | 40,00        | 24,36       | 23,11       | 16,90       | 31,20       | 35,19       | 40,00       | 20,85      | 24,92      |
| 40,00        | 40,00        | 25,44       | 22,76       | 16,54       | 27,95       | 38,37       | 40,00       | 20,52      | 25,83      |
| 40,00        | 40,00        | 25,12       | 23,05       | 17,74       | 28,42       | 37,59       | 40,00       | 22,12      | 25,29      |
| 40,00        | 40,00        | 23,57       | 21,65       | 15,96       | 28,93       | 33,96       | 37,55       | 19,80      | 24,67      |
| 40,00        | 40,00        | 24,06       | 21,62       | 15,96       | 29,94       | 39,51       | 40,00       | 20,04      | 25,07      |
| 40,00        | 40,00        | 25,68       | 22,99       | 17,94       | 34,58       | 40,00       | 40,00       | 21,95      | 24,94      |
| 40,00        | 40,00        | 27,10       | 24,18       | 19,12       | 33,41       | 40,00       | 40,00       | 22,84      | 27,13      |

| hsa-miR-26a | hsa-miR-26b | hsa-miR-27a | hsa-miR-27b | hsa-miR-28 | hsa-miR-28-3p | hsa-miR-296 | hsa-miR-296-3p | hsa-miR-298 | hsa-miR-299-3p |
|-------------|-------------|-------------|-------------|------------|---------------|-------------|----------------|-------------|----------------|
| 27,61       | 29,92       | 28,02       | 29,78       | 33,00      | 26,99         | 40,00       | 40,00          | 40,00       | 40,00          |
| 29,38       | 33,78       | 31,43       | 40,00       | 34,95      | 28,95         | 40,00       | 40,00          | 40,00       | 40,00          |
| 25,49       | 28,40       | 27,45       | 29,36       | 30,34      | 26,25         | 33,57       | 40,00          | 40,00       | 40,00          |
| 23,07       | 26,20       | 26,29       | 28,30       | 27,64      | 23,86         | 40,00       | 40,00          | 40,00       | 40,00          |
| 24,89       | 27,95       | 27,71       | 28,38       | 28,99      | 25,31         | 34,24       | 40,00          | 40,00       | 40,00          |
| 25,42       | 28,23       | 27,84       | 30,33       | 29,61      | 25,96         | 34,41       | 40,00          | 40,00       | 40,00          |
| 27,65       | 31,10       | 29,27       | 31,22       | 30,89      | 27,94         | 40,00       | 40,00          | 40,00       | 40,00          |
| 24,49       | 27,02       | 24,59       | 25,84       | 29,01      | 25,04         | 40,00       | 40,00          | 40,00       | 40,00          |
| 21,47       | 24,22       | 22,32       | 24,05       | 26,26      | 23,22         | 29,86       | 40,00          | 40,00       | 40,00          |
| 22,32       | 24,77       | 22,83       | 23,99       | 26,82      | 23,11         | 32,69       | 40,00          | 40,00       | 40,00          |
| 25,45       | 27,84       | 24,83       | 26,30       | 29,89      | 25,95         | 32,27       | 35,87          | 40,00       | 40,00          |
| 25,45       | 27,97       | 25,86       | 27,18       | 29,21      | 25,86         | 40,00       | 40,00          | 40,00       | 40,00          |
| 23,46       | 25,90       | 24,35       | 25,02       | 27,89      | 24,92         | 32,26       | 40,00          | 40,00       | 40,00          |
| 27,24       | 28,42       | 25,26       | 27,93       | 32,34      | 25,99         | 34,00       | 40,00          | 40,00       | 40,00          |
| 25,52       | 28,04       | 27,10       | 28,14       | 29,68      | 27,00         | 40,00       | 40,00          | 40,00       | 40,00          |
| 24,99       | 27,31       | 26,31       | 27,68       | 28,94      | 26,95         | 34,23       | 40,00          | 40,00       | 40,00          |
| 25,13       | 28,03       | 26,55       | 27,78       | 29,01      | 26,95         | 40,00       | 40,00          | 40,00       | 40,00          |
| 28,46       | 30,58       | 30,17       | 30,78       | 33,62      | 29,35         | 40,00       | 40,00          | 40,00       | 40,00          |
| 25,32       | 27,72       | 27,19       | 29,36       | 29,27      | 27,05         | 32,80       | 40,00          | 40,00       | 40,00          |
| 27,72       | 29,88       | 28,64       | 29,39       | 32,88      | 28,98         | 40,00       | 40,00          | 40,00       | 40,00          |
| 25,88       | 27,97       | 27,52       | 29,58       | 30,57      | 27,89         | 35,61       | 40,00          | 40,00       | 40,00          |
| 25,78       | 27,58       | 26,69       | 29,25       | 28,85      | 26,25         | 31,70       | 40,00          | 40,00       | 40,00          |
| 25,66       | 26,95       | 26,83       | 28,50       | 28,33      | 26,70         | 31,24       | 40,00          | 40,00       | 40,00          |
| 24,65       | 26,09       | 25,78       | 26,88       | 28,38      | 25,45         | 32,91       | 40,00          | 40,00       | 40,00          |
| 23,92       | 25,67       | 24,93       | 26,68       | 26,75      | 25,30         | 31,49       | 40,00          | 40,00       | 40,00          |
| 26,89       | 28,08       | 27,58       | 28,43       | 29,48      | 28,31         | 32,55       | 40,00          | 40,00       | 40,00          |
| 24,46       | 26,01       | 25,07       | 26,58       | 28,62      | 25,95         | 30,03       | 40,00          | 40,00       | 40,00          |
| 25,37       | 27,68       | 25,06       | 26,34       | 28,60      | 25,56         | 32,41       | 40,00          | 40,00       | 40,00          |
| 27,36       | 29,00       | 27,66       | 28,92       | 29,90      | 27,07         | 33,25       | 40,00          | 40,00       | 40,00          |
| 25,35       | 27,18       | 26,30       | 28,95       | 28,96      | 25,43         | 33,52       | 40,00          | 40,00       | 40,00          |
| 23,13       | 25,23       | 24,59       | 25,85       | 26,97      | 24,27         | 30,92       | 40,00          | 40,00       | 40,00          |
| 23,64       | 25,38       | 24,76       | 26,35       | 26,96      | 24,65         | 32,09       | 40,00          | 40,00       | 40,00          |
| 22,97       | 25,14       | 24,65       | 25,81       | 26,83      | 23,86         | 31,83       | 40,00          | 40,00       | 40,00          |
| 25,49       | 26,59       | 26,04       | 27,47       | 28,23      | 25,06         | 31,98       | 40,00          | 40,00       | 40,00          |
| 27,09       | 28,63       | 27,79       | 28,86       | 30,52      | 27,66         | 32,71       | 40,00          | 40,00       | 40,00          |
| 25,47       | 26,67       | 25,91       | 26,65       | 28,91      | 25,85         | 31,91       | 40,00          | 40,00       | 40,00          |
| 26,30       | 28,04       | 27,00       | 28,71       | 29,71      | 25,34         | 31,63       | 40,00          | 40,00       | 40,00          |
| 25,78       | 27,34       | 26,53       | 27,56       | 28,55      | 26,97         | 31,29       | 40,00          | 40,00       | 40,00          |
| 23,94       | 25,82       | 25,39       | 26,51       | 27,36      | 24,62         | 30,19       | 40,00          | 40,00       | 40,00          |
| 25,76       | 27,43       | 25,88       | 26,98       | 28,54      | 24,41         | 32,01       | 40,00          | 40,00       | 40,00          |
| 26,60       | 28,09       | 26,54       | 29,16       | 29,95      | 26,79         | 32,05       | 40,00          | 40,00       | 40,00          |
| 29,65       | 29,20       | 28,10       | 29,34       | 34,64      | 26,93         | 34,49       | 40,00          | 40,00       | 40,00          |

| hsa-miR-299-5p | hsa-miR-29a | hsa-miR-29b | hsa-miR-29c | hsa-miR-301 | hsa-miR-301b | hsa-miR-302a | hsa-miR-302b | hsa-miR-302c | hsa-miR-30b |
|----------------|-------------|-------------|-------------|-------------|--------------|--------------|--------------|--------------|-------------|
| 40,00          | 29,67       | 40,00       | 34,42       | 33,96       | 40,00        | 40,00        | 40,00        | 40,00        | 26,67       |
| 40,00          | 32,23       | 40,00       | 37,28       | 34,88       | 40,00        | 40,00        | 40,00        | 40,00        | 28,95       |
| 40,00          | 27,58       | 40,00       | 33,20       | 29,41       | 40,00        | 40,00        | 40,00        | 40,00        | 24,90       |
| 40,00          | 26,80       | 40,00       | 31,10       | 27,54       | 32,54        | 40,00        | 40,00        | 40,00        | 22,47       |
| 40,00          | 29,03       | 40,00       | 33,77       | 28,60       | 32,65        | 40,00        | 40,00        | 40,00        | 24,38       |
| 40,00          | 27,92       | 40,00       | 32,77       | 29,69       | 40,00        | 40,00        | 40,00        | 40,00        | 24,93       |
| 40,00          | 29,95       | 40,00       | 34,05       | 32,80       | 40,00        | 40,00        | 40,00        | 40,00        | 27,43       |
| 40,00          | 26,81       | 34,39       | 31,94       | 29,31       | 33,61        | 40,00        | 40,00        | 40,00        | 24,79       |
| 40,00          | 24,37       | 31,31       | 28,43       | 26,69       | 28,79        | 40,00        | 40,00        | 40,00        | 21,89       |
| 40,00          | 24,88       | 40,00       | 29,37       | 27,35       | 29,33        | 40,00        | 40,00        | 40,00        | 22,58       |
| 40,00          | 27,82       | 32,96       | 31,29       | 30,36       | 33,97        | 40,00        | 40,00        | 40,00        | 25,32       |
| 40,00          | 27,58       | 40,00       | 32,06       | 30,34       | 33,78        | 40,00        | 40,00        | 40,00        | 25,39       |
| 40,00          | 26,09       | 33,04       | 31,35       | 29,07       | 31,65        | 40,00        | 40,00        | 40,00        | 23,69       |
| 40,00          | 28,21       | 40,00       | 32,01       | 31,10       | 31,31        | 40,00        | 40,00        | 40,00        | 27,60       |
| 40,00          | 27,86       | 40,00       | 32,84       | 32,23       | 32,55        | 40,00        | 40,00        | 40,00        | 25,33       |
| 40,00          | 28,77       | 32,99       | 32,83       | 29,21       | 40,00        | 40,00        | 40,00        | 40,00        | 25,14       |
| 40,00          | 27,71       | 40,00       | 31,87       | 30,59       | 40,00        | 40,00        | 40,00        | 40,00        | 25,64       |
| 40,00          | 30,60       | 40,00       | 35,99       | 32,06       | 40,00        | 40,00        | 40,00        | 40,00        | 27,73       |
| 40,00          | 28,07       | 34,02       | 32,81       | 29,17       | 32,82        | 40,00        | 40,00        | 40,00        | 25,33       |
| 40,00          | 30,06       | 40,00       | 36,89       | 32,45       | 40,00        | 40,00        | 40,00        | 40,00        | 28,36       |
| 40,00          | 28,94       | 32,80       | 33,22       | 30,38       | 40,00        | 40,00        | 40,00        | 40,00        | 25,85       |
| 40,00          | 27,90       | 40,00       | 32,79       | 29,96       | 31,19        | 40,00        | 40,00        | 40,00        | 25,59       |
| 40,00          | 28,00       | 40,00       | 31,98       | 28,89       | 32,26        | 40,00        | 40,00        | 40,00        | 24,91       |
| 40,00          | 26,60       | 40,00       | 32,09       | 28,18       | 32,34        | 40,00        | 40,00        | 40,00        | 24,04       |
| 40,00          | 25,86       | 32,15       | 30,08       | 27,86       | 30,29        | 40,00        | 40,00        | 40,00        | 22,99       |
| 40,00          | 28,83       | 40,00       | 33,11       | 30,69       | 33,81        | 40,00        | 40,00        | 40,00        | 25,95       |
| 40,00          | 26,36       | 40,00       | 30,36       | 28,17       | 30,99        | 40,00        | 40,00        | 40,00        | 23,57       |
| 40,00          | 26,35       | 40,00       | 31,30       | 29,26       | 31,24        | 40,00        | 40,00        | 40,00        | 25,01       |
| 40,00          | 29,91       | 40,00       | 33,65       | 30,30       | 32,90        | 40,00        | 40,00        | 40,00        | 26,50       |
| 40,00          | 26,96       | 34,75       | 32,23       | 29,96       | 31,44        | 40,00        | 40,00        | 40,00        | 24,48       |
| 40,00          | 25,75       | 31,31       | 30,78       | 27,37       | 31,75        | 40,00        | 40,00        | 40,00        | 22,75       |
| 40,00          | 25,20       | 34,35       | 29,73       | 28,61       | 32,42        | 40,00        | 40,00        | 40,00        | 23,46       |
| 40,00          | 24,88       | 32,59       | 29,72       | 27,16       | 31,15        | 40,00        | 40,00        | 40,00        | 22,41       |
| 40,00          | 26,26       | 40,00       | 30,59       | 28,91       | 31,82        | 40,00        | 40,00        | 40,00        | 24,99       |
| 40,00          | 28,66       | 40,00       | 33,63       | 30,83       | 40,00        | 36,11        | 40,00        | 40,00        | 25,80       |
| 40,00          | 27,76       | 34,96       | 32,41       | 28,45       | 33,78        | 40,00        | 40,00        | 40,00        | 25,60       |
| 40,00          | 27,82       | 40,00       | 32,50       | 29,32       | 34,37        | 40,00        | 40,00        | 40,00        | 25,32       |
| 40,00          | 28,45       | 37,22       | 32,80       | 28,99       | 33,82        | 40,00        | 40,00        | 40,00        | 24,80       |
| 40,00          | 26,40       | 33,27       | 31,53       | 28,15       | 32,60        | 40,00        | 40,00        | 40,00        | 23,22       |
| 40,00          | 27,48       | 40,00       | 32,27       | 28,96       | 32,66        | 40,00        | 40,00        | 40,00        | 24,65       |
| 40,00          | 27,93       | 40,00       | 32,19       | 30,41       | 35,85        | 40,00        | 40,00        | 40,00        | 25,85       |
| 40,00          | 29,66       | 40,00       | 34,64       | 31,43       | 39,26        | 40,00        | 40,00        | 40,00        | 28,23       |

| hsa-miR-30c | hsa-miR-31 | hsa-miR-32 | hsa-miR-320 | hsa-miR-323-3p | hsa-miR-324-3p | hsa-miR-324-5p | hsa-miR-325 | hsa-miR-326 | hsa-miR-328 |
|-------------|------------|------------|-------------|----------------|----------------|----------------|-------------|-------------|-------------|
| 27,00       | 40,00      | 40,00      | 21,25       | 31,73          | 34,39          | 31,03          | 40,00       | 40,00       | 26,45       |
| 28,70       | 40,00      | 40,00      | 24,25       | 34,05          | 40,00          | 40,00          | 40,00       | 40,00       | 31,04       |
| 24,58       | 40,00      | 40,00      | 22,06       | 30,52          | 30,96          | 30,78          | 40,00       | 40,00       | 25,47       |
| 22,69       | 40,00      | 31,55      | 19,23       | 30,25          | 29,97          | 30,02          | 40,00       | 40,00       | 23,71       |
| 24,53       | 40,00      | 40,00      | 20,32       | 29,62          | 30,82          | 30,62          | 40,00       | 40,00       | 25,46       |
| 24,93       | 40,00      | 34,32      | 21,30       | 31,19          | 30,96          | 31,88          | 40,00       | 40,00       | 25,93       |
| 26,77       | 40,00      | 40,00      | 22,66       | 37,49          | 32,77          | 33,30          | 40,00       | 40,00       | 27,66       |
| 25,18       | 40,00      | 40,00      | 20,49       | 29,92          | 28,36          | 29,15          | 40,00       | 40,00       | 25,06       |
| 21,95       | 32,21      | 31,61      | 18,72       | 25,95          | 26,62          | 26,16          | 40,00       | 35,37       | 22,57       |
| 23,08       | 35,23      | 33,57      | 18,83       | 29,54          | 26,96          | 26,63          | 40,00       | 34,59       | 22,76       |
| 25,78       | 40,00      | 40,00      | 20,20       | 30,91          | 28,84          | 30,21          | 40,00       | 40,00       | 24,96       |
| 25,58       | 40,00      | 40,00      | 21,49       | 30,40          | 30,34          | 29,88          | 40,00       | 36,01       | 25,74       |
| 24,04       | 40,00      | 34,05      | 19,97       | 29,68          | 28,81          | 28,29          | 40,00       | 40,00       | 24,14       |
| 28,21       | 34,76      | 34,69      | 20,00       | 31,02          | 29,57          | 30,87          | 40,00       | 38,68       | 25,24       |
| 25,97       | 40,00      | 40,00      | 22,44       | 35,42          | 30,33          | 30,77          | 40,00       | 40,00       | 26,66       |
| 25,68       | 40,00      | 33,90      | 21,95       | 31,74          | 29,93          | 30,92          | 40,00       | 40,00       | 26,31       |
| 25,97       | 40,00      | 40,00      | 22,02       | 34,46          | 30,21          | 30,24          | 40,00       | 40,00       | 26,32       |
| 27,74       | 40,00      | 40,00      | 22,95       | 32,95          | 40,00          | 40,00          | 40,00       | 40,00       | 27,85       |
| 25,37       | 40,00      | 40,00      | 21,14       | 32,42          | 30,40          | 31,11          | 40,00       | 40,00       | 25,88       |
| 27,77       | 40,00      | 40,00      | 22,84       | 31,98          | 32,69          | 40,00          | 40,00       | 40,00       | 27,72       |
| 25,94       | 40,00      | 40,00      | 23,03       | 31,37          | 30,80          | 32,58          | 40,00       | 36,15       | 26,84       |
| 24,93       | 40,00      | 40,00      | 22,22       | 30,66          | 29,75          | 29,67          | 40,00       | 40,00       | 24,23       |
| 24,64       | 40,00      | 40,00      | 23,46       | 30,61          | 29,35          | 29,64          | 40,00       | 40,00       | 25,27       |
| 23,63       | 40,00      | 40,00      | 20,91       | 29,46          | 28,29          | 29,47          | 40,00       | 37,71       | 23,13       |
| 22,95       | 34,43      | 40,00      | 22,02       | 30,41          | 27,37          | 28,31          | 40,00       | 34,11       | 23,57       |
| 25,37       | 40,00      | 40,00      | 23,89       | 32,68          | 30,56          | 40,00          | 40,00       | 36,44       | 26,21       |
| 23,25       | 33,12      | 40,00      | 21,50       | 29,58          | 28,05          | 30,38          | 40,00       | 33,78       | 23,60       |
| 24,18       | 40,00      | 40,00      | 21,13       | 27,95          | 27,06          | 28,68          | 40,00       | 33,68       | 23,25       |
| 25,52       | 40,00      | 40,00      | 22,51       | 29,12          | 29,91          | 31,90          | 40,00       | 34,61       | 25,10       |
| 23,87       | 33,86      | 40,00      | 22,08       | 29,84          | 28,63          | 29,89          | 40,00       | 40,00       | 24,99       |
| 21,97       | 37,51      | 40,00      | 20,70       | 28,34          | 26,73          | 28,08          | 40,00       | 33,46       | 22,91       |
| 23,06       | 31,15      | 36,56      | 21,10       | 30,12          | 26,11          | 27,93          | 40,00       | 32,61       | 23,89       |
| 21,71       | 37,59      | 34,45      | 21,06       | 27,74          | 27,31          | 27,91          | 40,00       | 34,27       | 23,31       |
| 24,54       | 32,54      | 40,00      | 21,31       | 28,43          | 27,97          | 28,94          | 40,00       | 35,13       | 23,44       |
| 25,62       | 40,00      | 40,00      | 23,18       | 31,79          | 30,29          | 30,90          | 40,00       | 40,00       | 25,15       |
| 24,87       | 34,51      | 40,00      | 21,12       | 28,63          | 28,80          | 31,85          | 40,00       | 37,33       | 23,41       |
| 24,79       | 33,31      | 40,00      | 20,92       | 30,32          | 28,98          | 30,88          | 40,00       | 34,73       | 23,65       |
| 24,63       | 36,39      | 40,00      | 22,62       | 30,66          | 29,53          | 30,08          | 40,00       | 36,98       | 24,85       |
| 22,64       | 38,83      | 40,00      | 20,45       | 29,99          | 27,60          | 28,97          | 40,00       | 33,94       | 23,11       |
| 24,20       | 34,34      | 40,00      | 20,49       | 27,98          | 27,81          | 30,02          | 40,00       | 40,00       | 22,93       |
| 25,27       | 34,94      | 40,00      | 22,76       | 30,37          | 28,98          | 30,37          | 40,00       | 35,08       | 24,70       |
| 27,15       | 36,01      | 40,00      | 22,60       | 30,31          | 30,35          | 40,00          | 40,00       | 36,97       | 26,16       |

| hsa-miR-329 | hsa-miR-330 | hsa-miR-330-5p | hsa-miR-331 | hsa-miR-331-5p | hsa-miR-335 | hsa-miR-337-5p | hsa-miR-338-3p | hsa-miR-339-3p |
|-------------|-------------|----------------|-------------|----------------|-------------|----------------|----------------|----------------|
| 40,00       | 37,51       | 40,00          | 28,54       | 40,00          | 29,37       | 40,00          | 40,00          | 31,57          |
| 40,00       | 40,00       | 40,00          | 40,00       | 40,00          | 32,03       | 40,00          | 40,00          | 36,77          |
| 40,00       | 33,62       | 40,00          | 27,08       | 40,00          | 28,30       | 40,00          | 32,80          | 28,60          |
| 33,78       | 32,75       | 40,00          | 25,66       | 40,00          | 26,45       | 40,00          | 31,03          | 28,36          |
| 37,30       | 33,45       | 40,00          | 27,74       | 40,00          | 27,75       | 40,00          | 40,00          | 28,40          |
| 40,00       | 34,47       | 40,00          | 28,26       | 40,00          | 28,91       | 40,00          | 33,16          | 28,49          |
| 40,00       | 40,00       | 40,00          | 32,40       | 40,00          | 29,91       | 40,00          | 40,00          | 30,98          |
| 38,64       | 32,93       | 40,00          | 27,18       | 40,00          | 27,33       | 28,43          | 31,23          | 31,33          |
| 31,52       | 30,06       | 40,00          | 24,25       | 40,00          | 24,57       | 26,23          | 29,86          | 24,84          |
| 31,22       | 30,15       | 40,00          | 24,96       | 31,69          | 25,14       | 29,10          | 30,38          | 27,63          |
| 40,00       | 33,95       | 40,00          | 28,31       | 40,00          | 27,18       | 29,62          | 32,43          | 31,10          |
| 33,97       | 38,43       | 40,00          | 27,97       | 40,00          | 28,06       | 31,95          | 40,00          | 28,74          |
| 35,40       | 31,66       | 40,00          | 26,60       | 40,00          | 26,66       | 30,04          | 32,58          | 26,56          |
| 40,00       | 34,25       | 40,00          | 29,76       | 40,00          | 26,95       | 31,63          | 31,85          | 27,81          |
| 40,00       | 34,87       | 40,00          | 28,50       | 40,00          | 29,23       | 32,13          | 40,00          | 31,85          |
| 40,00       | 33,35       | 40,00          | 27,76       | 40,00          | 28,64       | 40,00          | 40,00          | 28,97          |
| 40,00       | 34,88       | 40,00          | 28,10       | 40,00          | 29,03       | 31,63          | 32,26          | 33,25          |
| 40,00       | 35,97       | 40,00          | 31,37       | 40,00          | 30,53       | 40,00          | 40,00          | 37,39          |
| 37,97       | 34,04       | 40,00          | 27,92       | 40,00          | 28,58       | 40,00          | 35,91          | 27,99          |
| 40,00       | 35,71       | 40,00          | 30,24       | 40,00          | 32,58       | 40,00          | 40,00          | 30,99          |
| 40,00       | 35,81       | 40,00          | 28,93       | 40,00          | 30,15       | 40,00          | 40,00          | 28,98          |
| 40,00       | 32,36       | 40,00          | 26,65       | 40,00          | 28,34       | 31,31          | 40,00          | 28,83          |
| 40,00       | 32,48       | 40,00          | 26,78       | 40,00          | 28,45       | 40,00          | 35,37          | 30,36          |
| 36,30       | 32,22       | 40,00          | 25,22       | 40,00          | 26,67       | 32,98          | 35,83          | 28,55          |
| 34,94       | 31,61       | 40,00          | 24,31       | 36,15          | 26,33       | 32,10          | 40,00          | 28,47          |
| 40,00       | 34,18       | 40,00          | 28,60       | 34,13          | 28,87       | 40,00          | 40,00          | 31,05          |
| 40,00       | 31,94       | 40,00          | 25,05       | 35,77          | 26,81       | 32,54          | 40,00          | 28,72          |
| 34,61       | 31,47       | 40,00          | 25,53       | 36,45          | 26,53       | 31,80          | 33,67          | 29,05          |
| 40,00       | 33,48       | 40,00          | 27,66       | 40,00          | 28,00       | 35,22          | 40,00          | 29,96          |
| 37,94       | 32,88       | 40,00          | 25,50       | 40,00          | 27,40       | 31,88          | 40,00          | 28,16          |
| 33,62       | 31,83       | 40,00          | 24,06       | 38,68          | 24,87       | 31,31          | 36,04          | 27,59          |
| 38,75       | 32,20       | 40,00          | 24,65       | 37,92          | 25,98       | 34,33          | 40,00          | 26,87          |
| 35,40       | 31,56       | 40,00          | 23,38       | 36,55          | 25,37       | 30,36          | 32,46          | 26,92          |
| 35,18       | 31,15       | 40,00          | 25,49       | 38,62          | 26,49       | 30,76          | 40,00          | 27,55          |
| 40,00       | 33,15       | 40,00          | 27,79       | 40,00          | 28,43       | 40,00          | 39,19          | 29,81          |
| 37,65       | 33,11       | 40,00          | 26,68       | 40,00          | 26,26       | 30,89          | 34,28          | 28,95          |
| 40,00       | 31,33       | 35,40          | 26,00       | 40,00          | 27,15       | 40,00          | 35,65          | 27,74          |
| 36,62       | 33,92       | 40,00          | 26,30       | 40,00          | 27,95       | 33,75          | 35,22          | 30,20          |
| 40,00       | 31,41       | 40,00          | 24,21       | 38,03          | 26,02       | 32,19          | 32,08          | 27,27          |
| 34,62       | 31,79       | 40,00          | 25,95       | 39,85          | 26,26       | 33,59          | 34,50          | 27,34          |
| 37,78       | 33,71       | 40,00          | 26,73       | 34,57          | 27,59       | 31,97          | 33,97          | 29,55          |
| 35,27       | 34,68       | 40,00          | 29,15       | 40,00          | 28,72       | 35,48          | 40,00          | 30,11          |

| hsa-miR-339-5p | hsa-miR-33b | hsa-miR-340 | hsa-miR-342-3p | hsa-miR-342-5p | hsa-miR-345 | hsa-miR-346 | hsa-miR-34a | hsa-miR-34c | hsa-miR-361 |
|----------------|-------------|-------------|----------------|----------------|-------------|-------------|-------------|-------------|-------------|
| 40,00          | 40,00       | 30,79       | 26,37          | 40,00          | 29,36       | 40,00       | 40,00       | 40,00       | 33,54       |
| 40,00          | 40,00       | 40,00       | 28,84          | 40,00          | 33,95       | 40,00       | 40,00       | 40,00       | 40,00       |
| 40,00          | 40,00       | 29,53       | 25,31          | 40,00          | 28,62       | 40,00       | 40,00       | 40,00       | 30,14       |
| 31,83          | 40,00       | 27,72       | 23,39          | 40,00          | 26,95       | 40,00       | 40,00       | 40,00       | 29,28       |
| 40,00          | 40,00       | 28,66       | 24,26          | 40,00          | 28,69       | 40,00       | 40,00       | 40,00       | 31,30       |
| 40,00          | 40,00       | 29,95       | 25,56          | 40,00          | 29,58       | 40,00       | 31,36       | 40,00       | 32,02       |
| 40,00          | 40,00       | 30,29       | 26,33          | 40,00          | 29,76       | 40,00       | 40,00       | 40,00       | 34,04       |
| 40,00          | 40,00       | 28,65       | 25,40          | 40,00          | 27,06       | 40,00       | 31,16       | 40,00       | 28,40       |
| 27,84          | 40,00       | 25,70       | 22,67          | 36,11          | 25,54       | 40,00       | 26,29       | 40,00       | 26,32       |
| 28,60          | 40,00       | 26,36       | 22,66          | 40,00          | 25,44       | 40,00       | 30,34       | 40,00       | 26,44       |
| 40,00          | 35,61       | 28,70       | 25,02          | 40,00          | 28,08       | 40,00       | 33,49       | 40,00       | 27,97       |
| 40,00          | 40,00       | 28,42       | 25,32          | 40,00          | 28,13       | 40,00       | 32,21       | 40,00       | 32,36       |
| 29,81          | 40,00       | 28,24       | 24,46          | 35,34          | 27,05       | 40,00       | 34,50       | 40,00       | 27,72       |
| 40,00          | 40,00       | 27,77       | 25,00          | 40,00          | 28,09       | 40,00       | 31,16       | 40,00       | 30,04       |
| 40,00          | 40,00       | 29,42       | 27,47          | 40,00          | 28,55       | 40,00       | 33,71       | 40,00       | 30,04       |
| 40,00          | 40,00       | 30,34       | 25,73          | 40,00          | 28,82       | 40,00       | 31,99       | 40,00       | 31,41       |
| 40,00          | 40,00       | 31,17       | 27,21          | 40,00          | 28,30       | 40,00       | 40,00       | 40,00       | 29,85       |
| 40,00          | 40,00       | 33,08       | 26,84          | 40,00          | 29,89       | 40,00       | 40,00       | 40,00       | 31,98       |
| 40,00          | 40,00       | 29,25       | 25,55          | 40,00          | 29,37       | 40,00       | 40,00       | 40,00       | 30,05       |
| 40,00          | 40,00       | 32,37       | 26,17          | 40,00          | 29,62       | 40,00       | 40,00       | 40,00       | 34,06       |
| 36,49          | 40,00       | 29,57       | 27,29          | 40,00          | 30,34       | 40,00       | 33,37       | 40,00       | 30,50       |
| 34,59          | 40,00       | 29,10       | 24,82          | 40,00          | 28,33       | 40,00       | 31,03       | 40,00       | 30,05       |
| 32,43          | 40,00       | 29,51       | 24,99          | 40,00          | 28,75       | 40,00       | 29,86       | 40,00       | 31,71       |
| 31,48          | 32,48       | 28,87       | 24,19          | 35,97          | 27,60       | 40,00       | 36,14       | 40,00       | 28,48       |
| 30,00          | 40,00       | 27,62       | 24,82          | 40,00          | 27,51       | 40,00       | 31,98       | 39,25       | 28,59       |
| 38,05          | 40,00       | 30,26       | 25,85          | 39,69          | 29,75       | 40,00       | 30,56       | 40,00       | 30,41       |
| 31,44          | 34,61       | 27,94       | 23,74          | 40,00          | 27,48       | 40,00       | 28,87       | 40,00       | 28,84       |
| 31,74          | 40,00       | 28,43       | 25,22          | 40,00          | 27,81       | 40,00       | 31,34       | 40,00       | 28,03       |
| 33,37          | 40,00       | 30,57       | 25,77          | 40,00          | 28,63       | 40,00       | 40,00       | 40,00       | 34,38       |
| 30,71          | 40,00       | 28,75       | 24,00          | 40,00          | 28,00       | 40,00       | 31,69       | 40,00       | 29,62       |
| 28,71          | 40,00       | 26,59       | 24,17          | 38,26          | 26,00       | 40,00       | 40,00       | 40,00       | 27,40       |
| 27,90          | 40,00       | 27,74       | 25,47          | 40,00          | 27,02       | 40,00       | 29,57       | 40,00       | 28,27       |
| 28,25          | 40,00       | 26,70       | 23,71          | 38,63          | 26,77       | 40,00       | 31,86       | 40,00       | 28,17       |
| 33,29          | 40,00       | 28,29       | 23,91          | 36,73          | 26,51       | 40,00       | 30,48       | 36,59       | 29,25       |
| 32,47          | 40,00       | 29,65       | 25,32          | 40,00          | 29,14       | 40,00       | 40,00       | 40,00       | 30,74       |
| 36,09          | 40,00       | 29,31       | 23,61          | 36,39          | 28,76       | 40,00       | 32,95       | 40,00       | 29,75       |
| 32,66          | 40,00       | 28,86       | 24,08          | 37,80          | 27,43       | 40,00       | 40,00       | 40,00       | 30,24       |
| 32,29          | 40,00       | 29,90       | 25,51          | 40,00          | 28,53       | 40,00       | 31,69       | 40,00       | 30,07       |
| 29,68          | 40,00       | 27,45       | 23,59          | 39,37          | 26,82       | 40,00       | 33,15       | 40,00       | 28,11       |
| 31,08          | 40,00       | 28,27       | 23,43          | 36,54          | 27,34       | 40,00       | 40,00       | 40,00       | 28,64       |
| 37,17          | 40,00       | 30,35       | 27,84          | 39,93          | 29,01       | 40,00       | 32,78       | 40,00       | 30,79       |
| 40,00          | 40,00       | 31,66       | 25,66          | 40,00          | 29,67       | 40,00       | 31,22       | 40,00       | 31,73       |



| hsa-miR-362 | hsa-miR-362-3p | hsa-miR-363 | hsa-miR-365 | hsa-miR-367 | hsa-miR-369-3p | hsa-miR-369-5p | hsa-miR-370 | hsa-miR-371-3p |
|-------------|----------------|-------------|-------------|-------------|----------------|----------------|-------------|----------------|
| 40,00       | 40,00          | 40,00       | 40,00       | 40,00       | 40,00          | 40,00          | 40,00       | 40,00          |
| 40,00       | 40,00          | 40,00       | 40,00       | 40,00       | 40,00          | 40,00          | 34,49       | 40,00          |
| 40,00       | 32,04          | 40,00       | 31,87       | 40,00       | 40,00          | 40,00          | 32,14       | 40,00          |
| 32,22       | 32,61          | 40,00       | 40,00       | 40,00       | 40,00          | 40,00          | 31,20       | 40,00          |
| 40,00       | 40,00          | 40,00       | 40,00       | 40,00       | 40,00          | 40,00          | 29,62       | 40,00          |
| 40,00       | 40,00          | 33,37       | 34,24       | 40,00       | 40,00          | 40,00          | 33,31       | 40,00          |
| 40,00       | 40,00          | 40,00       | 34,74       | 40,00       | 40,00          | 40,00          | 34,93       | 40,00          |
| 40,00       | 40,00          | 33,95       | 40,00       | 40,00       | 40,00          | 40,00          | 29,24       | 40,00          |
| 31,49       | 33,96          | 30,91       | 31,54       | 40,00       | 32,76          | 32,05          | 24,86       | 40,00          |
| 40,00       | 40,00          | 29,77       | 40,00       | 40,00       | 40,00          | 32,71          | 29,02       | 40,00          |
| 33,37       | 34,37          | 30,96       | 40,00       | 40,00       | 40,00          | 40,00          | 33,38       | 40,00          |
| 35,43       | 40,00          | 40,00       | 31,93       | 40,00       | 34,71          | 40,00          | 29,51       | 40,00          |
| 32,14       | 40,00          | 34,51       | 31,72       | 40,00       | 40,00          | 40,00          | 30,10       | 40,00          |
| 40,00       | 40,00          | 31,55       | 32,70       | 40,00       | 40,00          | 40,00          | 35,94       | 40,00          |
| 40,00       | 40,00          | 33,04       | 40,00       | 40,00       | 40,00          | 40,00          | 31,29       | 40,00          |
| 40,00       | 33,80          | 40,00       | 40,00       | 40,00       | 40,00          | 40,00          | 40,00       | 40,00          |
| 34,94       | 32,88          | 33,22       | 40,00       | 40,00       | 33,37          | 40,00          | 31,92       | 40,00          |
| 40,00       | 40,00          | 40,00       | 40,00       | 40,00       | 40,00          | 40,00          | 35,71       | 40,00          |
| 40,00       | 40,00          | 32,41       | 33,83       | 40,00       | 40,00          | 40,00          | 31,55       | 40,00          |
| 40,00       | 40,00          | 34,04       | 34,02       | 40,00       | 40,00          | 40,00          | 33,20       | 40,00          |
| 40,00       | 40,00          | 34,60       | 34,26       | 40,00       | 40,00          | 40,00          | 30,25       | 40,00          |
| 40,00       | 40,00          | 32,10       | 31,03       | 40,00       | 40,00          | 40,00          | 37,22       | 40,00          |
| 33,97       | 40,00          | 33,23       | 31,50       | 40,00       | 40,00          | 40,00          | 36,25       | 40,00          |
| 33,80       | 34,83          | 37,65       | 31,24       | 40,00       | 34,72          | 40,00          | 38,47       | 40,00          |
| 35,54       | 40,00          | 32,13       | 30,39       | 40,00       | 40,00          | 36,61          | 37,71       | 40,00          |
| 40,00       | 40,00          | 35,66       | 34,10       | 40,00       | 40,00          | 40,00          | 40,00       | 40,00          |
| 40,00       | 40,00          | 35,44       | 29,55       | 40,00       | 40,00          | 40,00          | 33,66       | 40,00          |
| 34,18       | 33,96          | 31,65       | 32,62       | 40,00       | 40,00          | 39,82          | 32,90       | 40,00          |
| 40,00       | 33,34          | 40,00       | 36,46       | 40,00       | 40,00          | 40,00          | 36,93       | 40,00          |
| 40,00       | 40,00          | 34,29       | 33,45       | 40,00       | 40,00          | 38,80          | 29,13       | 40,00          |
| 31,68       | 32,23          | 34,51       | 33,12       | 40,00       | 40,00          | 39,72          | 28,36       | 40,00          |
| 40,00       | 31,87          | 33,04       | 34,07       | 40,00       | 40,00          | 40,00          | 31,01       | 40,00          |
| 32,33       | 31,84          | 39,18       | 30,93       | 40,00       | 33,07          | 38,67          | 27,65       | 40,00          |
| 35,76       | 40,00          | 33,15       | 31,43       | 40,00       | 40,00          | 38,23          | 29,48       | 40,00          |
| 40,00       | 40,00          | 39,30       | 34,89       | 40,00       | 40,00          | 34,85          | 40,00       | 40,00          |
| 40,00       | 40,00          | 40,00       | 33,33       | 40,00       | 40,00          | 40,00          | 36,99       | 40,00          |
| 40,00       | 40,00          | 40,00       | 31,68       | 40,00       | 40,00          | 40,00          | 40,00       | 40,00          |
| 40,00       | 40,00          | 38,30       | 32,23       | 40,00       | 40,00          | 40,00          | 40,00       | 40,00          |
| 34,73       | 35,17          | 34,03       | 32,23       | 40,00       | 40,00          | 40,00          | 32,93       | 40,00          |
| 33,88       | 40,00          | 31,79       | 33,81       | 40,00       | 40,00          | 35,38          | 30,53       | 40,00          |
| 40,00       | 34,13          | 33,44       | 32,74       | 40,00       | 34,82          | 34,45          | 39,19       | 40,00          |
| 40,00       | 40,00          | 40,00       | 34,25       | 40,00       | 40,00          | 40,00          | 40,00       | 40,00          |

| hsa-miR-372 | hsa-miR-373 | hsa-miR-374 | hsa-miR-375 | hsa-miR-376a | hsa-miR-376b | hsa-miR-376c | hsa-miR-377 | hsa-miR-380-3p | hsa-miR-381 |
|-------------|-------------|-------------|-------------|--------------|--------------|--------------|-------------|----------------|-------------|
| 40,00       | 40,00       | 29,21       | 40,00       | 28,77        | 40,00        | 28,65        | 40,00       | 40,00          | 40,00       |
| 40,00       | 40,00       | 32,55       | 33,27       | 33,07        | 40,00        | 32,68        | 40,00       | 40,00          | 40,00       |
| 40,00       | 40,00       | 27,96       | 30,02       | 28,36        | 40,00        | 28,38        | 40,00       | 40,00          | 27,43       |
| 40,00       | 40,00       | 25,77       | 31,29       | 28,61        | 40,00        | 28,21        | 33,20       | 40,00          | 40,00       |
| 40,00       | 40,00       | 28,04       | 32,99       | 28,72        | 40,00        | 27,58        | 40,00       | 40,00          | 28,51       |
| 40,00       | 40,00       | 28,45       | 40,00       | 30,43        | 40,00        | 30,20        | 40,00       | 40,00          | 27,54       |
| 40,00       | 40,00       | 30,23       | 30,98       | 31,79        | 40,00        | 31,27        | 40,00       | 40,00          | 25,72       |
| 40,00       | 40,00       | 27,98       | 28,92       | 27,22        | 40,00        | 26,50        | 40,00       | 40,00          | 40,00       |
| 40,00       | 40,00       | 24,79       | 28,19       | 24,03        | 35,52        | 22,94        | 32,22       | 40,00          | 24,95       |
| 40,00       | 40,00       | 25,77       | 30,57       | 27,04        | 40,00        | 26,78        | 40,00       | 40,00          | 40,00       |
| 40,00       | 40,00       | 28,10       | 28,97       | 27,10        | 40,00        | 26,17        | 40,00       | 40,00          | 40,00       |
| 40,00       | 40,00       | 28,24       | 30,97       | 28,72        | 40,00        | 27,47        | 40,00       | 40,00          | 26,17       |
| 40,00       | 40,00       | 26,40       | 29,24       | 27,45        | 40,00        | 26,65        | 40,00       | 40,00          | 25,53       |
| 40,00       | 40,00       | 30,10       | 40,00       | 29,50        | 40,00        | 28,51        | 40,00       | 40,00          | 25,56       |
| 40,00       | 40,00       | 28,72       | 32,83       | 31,61        | 40,00        | 30,19        | 40,00       | 40,00          | 40,00       |
| 40,00       | 40,00       | 27,67       | 30,89       | 32,56        | 40,00        | 30,68        | 40,00       | 40,00          | 24,62       |
| 40,00       | 40,00       | 27,98       | 40,00       | 29,51        | 40,00        | 29,44        | 40,00       | 40,00          | 33,48       |
| 40,00       | 40,00       | 30,70       | 40,00       | 32,17        | 40,00        | 32,23        | 40,00       | 40,00          | 40,00       |
| 40,00       | 40,00       | 28,21       | 31,03       | 30,28        | 40,00        | 29,01        | 40,00       | 40,00          | 26,62       |
| 40,00       | 40,00       | 30,19       | 29,10       | 31,39        | 40,00        | 31,00        | 40,00       | 40,00          | 24,34       |
| 40,00       | 40,00       | 28,33       | 31,93       | 31,37        | 40,00        | 28,85        | 40,00       | 40,00          | 24,76       |
| 39,39       | 40,00       | 29,13       | 27,70       | 29,52        | 40,00        | 30,08        | 40,00       | 40,00          | 22,47       |
| 38,73       | 40,00       | 27,78       | 27,66       | 32,27        | 40,00        | 31,02        | 40,00       | 40,00          | 23,66       |
| 40,00       | 33,10       | 27,39       | 29,71       | 28,44        | 40,00        | 28,32        | 40,00       | 40,00          | 22,89       |
| 37,54       | 40,00       | 26,47       | 27,44       | 28,91        | 40,00        | 28,71        | 40,00       | 40,00          | 22,01       |
| 40,00       | 40,00       | 29,80       | 28,32       | 30,14        | 40,00        | 30,53        | 40,00       | 40,00          | 22,52       |
| 37,99       | 33,86       | 26,80       | 25,95       | 28,25        | 40,00        | 28,72        | 40,00       | 40,00          | 21,01       |
| 37,81       | 33,33       | 27,99       | 28,61       | 27,00        | 40,00        | 26,52        | 40,00       | 40,00          | 22,09       |
| 39,00       | 40,00       | 30,78       | 29,51       | 28,95        | 40,00        | 28,75        | 40,00       | 40,00          | 22,09       |
| 40,00       | 40,00       | 27,72       | 28,71       | 27,76        | 40,00        | 26,92        | 40,00       | 40,00          | 24,69       |
| 38,22       | 40,00       | 25,78       | 28,83       | 26,70        | 40,00        | 26,05        | 40,00       | 40,00          | 21,83       |
| 38,88       | 32,34       | 25,62       | 30,02       | 27,06        | 40,00        | 26,59        | 40,00       | 40,00          | 23,35       |
| 34,00       | 33,99       | 25,16       | 28,06       | 25,85        | 40,00        | 24,93        | 40,00       | 40,00          | 22,58       |
| 40,00       | 40,00       | 27,84       | 28,45       | 26,69        | 40,00        | 25,98        | 34,05       | 38,41          | 23,59       |
| 40,00       | 40,00       | 29,58       | 27,29       | 29,37        | 40,00        | 30,22        | 40,00       | 40,00          | 23,17       |
| 39,58       | 33,91       | 28,98       | 28,42       | 26,41        | 40,00        | 26,05        | 40,00       | 40,00          | 22,20       |
| 40,00       | 40,00       | 29,05       | 28,42       | 29,17        | 40,00        | 28,04        | 40,00       | 40,00          | 24,32       |
| 38,90       | 33,82       | 28,42       | 28,28       | 30,26        | 40,00        | 30,28        | 40,00       | 40,00          | 22,46       |
| 40,00       | 32,74       | 26,82       | 27,92       | 29,41        | 40,00        | 29,32        | 40,00       | 40,00          | 23,93       |
| 40,00       | 40,00       | 28,06       | 29,41       | 26,58        | 40,00        | 25,41        | 40,00       | 40,00          | 23,51       |
| 31,52       | 40,00       | 30,25       | 27,98       | 28,68        | 40,00        | 27,63        | 40,00       | 40,00          | 21,41       |
| 40,00       | 40,00       | 31,49       | 26,98       | 29,24        | 40,00        | 28,65        | 40,00       | 40,00          | 23,13       |

| hsa-miR-382 | hsa-miR-383 | hsa-miR-384 | hsa-miR-409-5p | hsa-miR-410 | hsa-miR-411 | hsa-miR-412 | hsa-miR-422a | hsa-miR-423-5p | hsa-miR-424 |
|-------------|-------------|-------------|----------------|-------------|-------------|-------------|--------------|----------------|-------------|
| 31,42       | 40,00       | 40,00       | 40,00          | 32,76       | 32,22       | 40,00       | 40,00        | 31,90          | 40,00       |
| 40,00       | 40,00       | 40,00       | 40,00          | 34,69       | 40,00       | 40,00       | 40,00        | 33,03          | 40,00       |
| 31,26       | 40,00       | 40,00       | 40,00          | 32,46       | 33,37       | 40,00       | 40,00        | 29,54          | 40,00       |
| 29,29       | 40,00       | 40,00       | 40,00          | 31,45       | 29,79       | 40,00       | 40,00        | 28,31          | 40,00       |
| 28,30       | 40,00       | 40,00       | 34,67          | 30,84       | 32,16       | 40,00       | 40,00        | 29,17          | 40,00       |
| 40,00       | 40,00       | 40,00       | 40,00          | 34,45       | 33,07       | 40,00       | 40,00        | 30,10          | 40,00       |
| 40,00       | 40,00       | 40,00       | 40,00          | 35,36       | 40,00       | 40,00       | 40,00        | 31,02          | 40,00       |
| 27,01       | 40,00       | 40,00       | 38,03          | 29,45       | 29,58       | 40,00       | 38,96        | 28,08          | 33,25       |
| 23,56       | 40,00       | 40,00       | 32,61          | 25,47       | 26,08       | 40,00       | 39,20        | 25,78          | 30,44       |
| 27,10       | 40,00       | 40,00       | 40,00          | 29,86       | 28,80       | 40,00       | 37,63        | 26,31          | 31,67       |
| 29,14       | 40,00       | 40,00       | 40,00          | 30,01       | 32,05       | 40,00       | 40,00        | 28,85          | 33,56       |
| 31,61       | 40,00       | 40,00       | 35,63          | 30,54       | 32,78       | 40,00       | 40,00        | 29,69          | 40,00       |
| 27,66       | 40,00       | 40,00       | 40,00          | 29,27       | 32,12       | 40,00       | 40,00        | 27,14          | 32,14       |
| 31,37       | 40,00       | 40,00       | 40,00          | 31,52       | 37,94       | 40,00       | 33,26        | 27,88          | 40,00       |
| 34,52       | 40,00       | 40,00       | 40,00          | 31,43       | 31,56       | 40,00       | 40,00        | 29,27          | 40,00       |
| 40,00       | 40,00       | 40,00       | 40,00          | 32,74       | 36,83       | 40,00       | 40,00        | 28,73          | 33,26       |
| 40,00       | 40,00       | 40,00       | 40,00          | 33,09       | 31,15       | 40,00       | 40,00        | 29,57          | 40,00       |
| 40,00       | 40,00       | 40,00       | 40,00          | 34,33       | 32,46       | 40,00       | 40,00        | 31,20          | 40,00       |
| 40,00       | 40,00       | 40,00       | 40,00          | 31,96       | 35,23       | 40,00       | 40,00        | 29,26          | 33,08       |
| 33,67       | 40,00       | 40,00       | 40,00          | 33,92       | 40,00       | 40,00       | 40,00        | 30,07          | 40,00       |
| 35,25       | 40,00       | 40,00       | 40,00          | 32,87       | 37,05       | 40,00       | 40,00        | 29,72          | 32,23       |
| 29,66       | 40,00       | 40,00       | 40,00          | 31,93       | 40,00       | 40,00       | 40,00        | 28,93          | 40,00       |
| 31,15       | 40,00       | 40,00       | 40,00          | 34,49       | 40,00       | 40,00       | 33,89        | 28,89          | 40,00       |
| 27,86       | 40,00       | 40,00       | 40,00          | 30,94       | 36,76       | 40,00       | 40,00        | 27,10          | 38,21       |
| 29,00       | 40,00       | 40,00       | 38,94          | 32,06       | 39,37       | 40,00       | 40,00        | 27,30          | 33,23       |
| 32,71       | 38,02       | 40,00       | 40,00          | 32,21       | 40,00       | 40,00       | 40,00        | 30,34          | 40,00       |
| 28,95       | 40,00       | 40,00       | 40,00          | 31,55       | 40,00       | 40,00       | 40,00        | 27,59          | 40,00       |
| 25,22       | 40,00       | 40,00       | 40,00          | 29,73       | 37,31       | 40,00       | 40,00        | 26,99          | 40,00       |
| 27,56       | 40,00       | 40,00       | 40,00          | 32,67       | 40,00       | 40,00       | 40,00        | 28,11          | 40,00       |
| 28,52       | 40,00       | 40,00       | 40,00          | 30,67       | 38,06       | 40,00       | 40,00        | 29,94          | 40,00       |
| 25,82       | 40,00       | 40,00       | 40,00          | 28,81       | 35,58       | 40,00       | 40,00        | 26,43          | 33,49       |
| 25,80       | 40,00       | 40,00       | 40,00          | 31,14       | 35,17       | 40,00       | 40,00        | 27,19          | 40,00       |
| 25,67       | 40,00       | 40,00       | 40,00          | 28,33       | 31,77       | 40,00       | 33,17        | 27,57          | 33,18       |
| 26,06       | 40,00       | 40,00       | 35,99          | 28,92       | 35,07       | 40,00       | 40,00        | 28,37          | 32,61       |
| 27,66       | 40,00       | 40,00       | 40,00          | 31,96       | 38,11       | 40,00       | 37,95        | 30,08          | 40,00       |
| 25,55       | 40,00       | 40,00       | 40,00          | 29,59       | 38,07       | 40,00       | 32,82        | 27,15          | 37,34       |
| 28,86       | 40,00       | 40,00       | 40,00          | 31,47       | 40,00       | 40,00       | 40,00        | 28,16          | 40,00       |
| 30,69       | 40,00       | 40,00       | 40,00          | 33,05       | 39,18       | 40,00       | 36,68        | 28,02          | 33,38       |
| 29,59       | 40,00       | 40,00       | 40,00          | 32,43       | 39,14       | 40,00       | 31,99        | 26,64          | 33,43       |
| 25,94       | 40,00       | 40,00       | 40,00          | 29,70       | 35,77       | 40,00       | 40,00        | 27,23          | 40,00       |
| 28,21       | 40,00       | 40,00       | 40,00          | 30,49       | 32,19       | 40,00       | 36,84        | 28,60          | 34,13       |
| 30,31       | 40,00       | 40,00       | 40,00          | 33,43       | 40,00       | 40,00       | 40,00        | 29,60          | 40,00       |

| hsa-miR-425-5p | hsa-miR-429 | hsa-miR-431 | hsa-miR-433 | hsa-miR-448 | hsa-miR-449 | hsa-miR-449b | hsa-miR-450a | hsa-miR-450b-3p |
|----------------|-------------|-------------|-------------|-------------|-------------|--------------|--------------|-----------------|
| 29,56          | 40,00       | 40,00       | 31,90       | 40,00       | 40,00       | 40,00        | 40,00        | 40,00           |
| 32,45          | 40,00       | 40,00       | 30,89       | 40,00       | 40,00       | 40,00        | 40,00        | 40,00           |
| 40,00          | 40,00       | 40,00       | 31,44       | 40,00       | 40,00       | 40,00        | 40,00        | 40,00           |
| 27,49          | 34,25       | 40,00       | 29,91       | 40,00       | 40,00       | 40,00        | 32,51        | 40,00           |
| 31,12          | 34,38       | 36,38       | 30,10       | 40,00       | 40,00       | 40,00        | 40,00        | 40,00           |
| 40,00          | 40,00       | 40,00       | 32,94       | 40,00       | 40,00       | 40,00        | 40,00        | 40,00           |
| 40,00          | 40,00       | 40,00       | 33,12       | 40,00       | 40,00       | 40,00        | 40,00        | 40,00           |
| 28,22          | 40,00       | 40,00       | 28,90       | 40,00       | 40,00       | 40,00        | 40,00        | 40,00           |
| 26,86          | 40,00       | 27,22       | 25,50       | 40,00       | 34,36       | 36,70        | 31,89        | 40,00           |
| 26,23          | 40,00       | 40,00       | 28,73       | 40,00       | 31,84       | 40,00        | 40,00        | 40,00           |
| 28,70          | 40,00       | 40,00       | 30,23       | 40,00       | 40,00       | 40,00        | 40,00        | 40,00           |
| 40,00          | 40,00       | 40,00       | 30,47       | 40,00       | 40,00       | 40,00        | 40,00        | 40,00           |
| 40,00          | 40,00       | 40,00       | 28,84       | 40,00       | 40,00       | 40,00        | 40,00        | 40,00           |
| 40,00          | 40,00       | 40,00       | 30,70       | 40,00       | 40,00       | 40,00        | 40,00        | 40,00           |
| 30,23          | 40,00       | 40,00       | 31,55       | 40,00       | 40,00       | 40,00        | 40,00        | 40,00           |
| 31,73          | 40,00       | 40,00       | 31,96       | 40,00       | 40,00       | 40,00        | 40,00        | 40,00           |
| 30,05          | 40,00       | 40,00       | 31,76       | 40,00       | 40,00       | 40,00        | 40,00        | 40,00           |
| 29,96          | 40,00       | 40,00       | 31,53       | 40,00       | 40,00       | 40,00        | 40,00        | 40,00           |
| 40,00          | 40,00       | 40,00       | 33,16       | 40,00       | 40,00       | 40,00        | 32,19        | 40,00           |
| 34,26          | 40,00       | 40,00       | 33,66       | 40,00       | 40,00       | 40,00        | 40,00        | 40,00           |
| 35,61          | 40,00       | 39,78       | 31,26       | 40,00       | 40,00       | 40,00        | 40,00        | 40,00           |
| 33,33          | 33,21       | 40,00       | 33,36       | 40,00       | 40,00       | 40,00        | 40,00        | 40,00           |
| 33,99          | 40,00       | 40,00       | 36,13       | 40,00       | 40,00       | 40,00        | 40,00        | 40,00           |
| 30,47          | 32,58       | 38,62       | 31,10       | 40,00       | 40,00       | 40,00        | 40,00        | 40,00           |
| 29,91          | 40,00       | 40,00       | 40,00       | 36,01       | 40,00       | 40,00        | 40,00        | 40,00           |
| 33,69          | 40,00       | 40,00       | 34,17       | 40,00       | 40,00       | 40,00        | 40,00        | 40,00           |
| 29,45          | 40,00       | 40,00       | 34,45       | 40,00       | 40,00       | 34,17        | 40,00        | 40,00           |
| 29,65          | 40,00       | 32,38       | 31,11       | 40,00       | 40,00       | 40,00        | 40,00        | 40,00           |
| 34,86          | 40,00       | 39,06       | 31,74       | 40,00       | 40,00       | 40,00        | 40,00        | 40,00           |
| 31,92          | 40,00       | 36,69       | 33,52       | 40,00       | 40,00       | 40,00        | 40,00        | 40,00           |
| 26,61          | 40,00       | 35,10       | 29,37       | 40,00       | 40,00       | 37,01        | 40,00        | 40,00           |
| 29,97          | 35,74       | 35,69       | 36,25       | 36,04       | 40,00       | 40,00        | 40,00        | 40,00           |
| 26,64          | 35,87       | 31,61       | 28,59       | 40,00       | 37,83       | 34,43        | 40,00        | 40,00           |
| 29,34          | 40,00       | 32,16       | 29,69       | 40,00       | 40,00       | 40,00        | 40,00        | 40,00           |
| 33,18          | 40,00       | 40,00       | 36,32       | 40,00       | 40,00       | 40,00        | 40,00        | 40,00           |
| 30,54          | 35,00       | 34,72       | 27,87       | 40,00       | 38,84       | 40,00        | 40,00        | 40,00           |
| 29,86          | 40,00       | 40,00       | 32,60       | 40,00       | 36,68       | 40,00        | 40,00        | 40,00           |
| 34,54          | 35,00       | 40,00       | 33,46       | 40,00       | 40,00       | 40,00        | 40,00        | 40,00           |
| 28,57          | 40,00       | 39,66       | 31,46       | 40,00       | 40,00       | 40,00        | 40,00        | 40,00           |
| 27,57          | 40,00       | 33,06       | 28,23       | 40,00       | 40,00       | 40,00        | 40,00        | 40,00           |
| 25,21          | 40,00       | 37,72       | 40,00       | 31,72       | 40,00       | 40,00        | 35,22        | 40,00           |
| 34,88          | 40,00       | 40,00       | 30,56       | 40,00       | 40,00       | 40,00        | 40,00        | 40,00           |

| hsa-miR-450b-5p | hsa-miR-452 | hsa-miR-453 | hsa-miR-454 | hsa-miR-455 | hsa-miR-455-3p | hsa-miR-483-5p | hsa-miR-484 | hsa-miR-485-3p |
|-----------------|-------------|-------------|-------------|-------------|----------------|----------------|-------------|----------------|
| 40,00           | 40,00       | 40,00       | 28,96       | 40,00       | 40,00          | 26,99          | 21,37       | 31,22          |
| 40,00           | 40,00       | 40,00       | 30,76       | 40,00       | 40,00          | 25,95          | 26,16       | 31,11          |
| 40,00           | 34,74       | 40,00       | 26,94       | 40,00       | 40,00          | 27,37          | 20,92       | 28,77          |
| 40,00           | 33,56       | 40,00       | 24,41       | 40,00       | 40,00          | 29,42          | 19,93       | 28,95          |
| 40,00           | 32,26       | 40,00       | 26,21       | 40,00       | 40,00          | 27,40          | 21,44       | 27,99          |
| 40,00           | 40,00       | 40,00       | 27,12       | 40,00       | 40,00          | 28,48          | 22,61       | 30,84          |
| 40,00           | 40,00       | 40,00       | 30,58       | 40,00       | 40,00          | 28,53          | 23,66       | 40,00          |
| 40,00           | 32,98       | 40,00       | 28,38       | 40,00       | 40,00          | 27,20          | 21,77       | 29,98          |
| 40,00           | 32,28       | 40,00       | 25,17       | 40,00       | 40,00          | 27,14          | 19,17       | 25,53          |
| 33,85           | 31,20       | 40,00       | 26,13       | 40,00       | 40,00          | 27,97          | 19,53       | 28,77          |
| 40,00           | 36,42       | 40,00       | 29,15       | 40,00       | 40,00          | 28,82          | 21,21       | 31,04          |
| 40,00           | 34,86       | 40,00       | 29,06       | 40,00       | 40,00          | 27,71          | 21,72       | 31,45          |
| 40,00           | 30,99       | 40,00       | 26,58       | 40,00       | 40,00          | 27,69          | 21,11       | 28,75          |
| 40,00           | 33,87       | 40,00       | 30,57       | 40,00       | 40,00          | 26,65          | 21,87       | 33,32          |
| 40,00           | 34,50       | 40,00       | 29,34       | 40,00       | 40,00          | 30,07          | 22,71       | 30,55          |
| 40,00           | 34,79       | 40,00       | 27,34       | 40,00       | 40,00          | 28,65          | 23,57       | 40,00          |
| 40,00           | 40,00       | 40,00       | 28,26       | 40,00       | 40,00          | 30,95          | 22,66       | 33,09          |
| 40,00           | 40,00       | 40,00       | 30,48       | 40,00       | 40,00          | 29,31          | 24,97       | 33,50          |
| 40,00           | 40,00       | 40,00       | 27,85       | 40,00       | 40,00          | 27,64          | 22,31       | 30,50          |
| 40,00           | 40,00       | 40,00       | 31,35       | 40,00       | 40,00          | 27,87          | 24,20       | 40,00          |
| 40,00           | 31,92       | 40,00       | 28,92       | 40,00       | 40,00          | 28,52          | 23,00       | 33,07          |
| 40,00           | 32,25       | 40,00       | 29,95       | 40,00       | 40,00          | 28,21          | 21,44       | 30,68          |
| 40,00           | 40,00       | 40,00       | 28,30       | 40,00       | 40,00          | 29,86          | 22,34       | 30,70          |
| 40,00           | 31,20       | 40,00       | 28,08       | 35,11       | 40,00          | 28,06          | 20,45       | 29,81          |
| 40,00           | 30,85       | 40,00       | 27,75       | 40,00       | 40,00          | 28,99          | 20,82       | 40,00          |
| 40,00           | 35,32       | 40,00       | 29,23       | 40,00       | 40,00          | 30,50          | 23,18       | 32,26          |
| 40,00           | 31,53       | 40,00       | 27,82       | 40,00       | 40,00          | 27,38          | 20,61       | 31,86          |
| 40,00           | 32,27       | 40,00       | 29,19       | 40,00       | 40,00          | 29,08          | 21,40       | 31,71          |
| 40,00           | 40,00       | 40,00       | 29,67       | 40,00       | 40,00          | 28,34          | 22,48       | 31,70          |
| 40,00           | 31,40       | 40,00       | 28,50       | 40,00       | 40,00          | 27,18          | 20,70       | 31,64          |
| 40,00           | 30,16       | 40,00       | 26,79       | 34,48       | 40,00          | 27,90          | 19,57       | 30,51          |
| 40,00           | 33,85       | 40,00       | 26,54       | 40,00       | 40,00          | 27,84          | 21,07       | 32,18          |
| 32,63           | 30,91       | 38,02       | 26,27       | 40,00       | 40,00          | 27,19          | 19,32       | 28,45          |
| 40,00           | 35,02       | 40,00       | 28,79       | 40,00       | 40,00          | 28,01          | 20,19       | 29,88          |
| 40,00           | 34,94       | 40,00       | 31,01       | 40,00       | 40,00          | 29,38          | 22,32       | 29,64          |
| 40,00           | 34,33       | 40,00       | 30,68       | 40,00       | 40,00          | 28,61          | 21,33       | 28,48          |
| 40,00           | 31,04       | 40,00       | 29,05       | 40,00       | 40,00          | 28,57          | 20,20       | 31,82          |
| 40,00           | 31,86       | 40,00       | 29,76       | 40,00       | 40,00          | 28,20          | 21,87       | 31,66          |
| 40,00           | 32,50       | 40,00       | 27,44       | 40,00       | 40,00          | 27,07          | 19,94       | 33,09          |
| 40,00           | 32,95       | 40,00       | 28,86       | 40,00       | 40,00          | 27,46          | 19,33       | 28,79          |
| 40,00           | 40,00       | 40,00       | 30,73       | 40,00       | 40,00          | 29,45          | 21,92       | 32,38          |
| 40,00           | 34,80       | 40,00       | 31,52       | 40,00       | 40,00          | 27,58          | 22,03       | 33,10          |

| hsa-miR-485-5p | hsa-miR-486 | hsa-miR-486-3p | hsa-miR-487a | hsa-miR-487b | hsa-miR-488 | hsa-miR-489 | hsa-miR-490 | hsa-miR-491-3p |
|----------------|-------------|----------------|--------------|--------------|-------------|-------------|-------------|----------------|
| 40,00          | 27,91       | 32,81          | 40,00        | 32,08        | 40,00       | 40,00       | 40,00       | 40,00          |
| 40,00          | 29,12       | 34,86          | 40,00        | 33,75        | 40,00       | 40,00       | 40,00       | 40,00          |
| 40,00          | 28,54       | 35,64          | 40,00        | 30,06        | 40,00       | 40,00       | 40,00       | 40,00          |
| 40,00          | 26,50       | 31,64          | 40,00        | 29,44        | 40,00       | 40,00       | 40,00       | 40,00          |
| 40,00          | 27,14       | 32,58          | 40,00        | 30,26        | 40,00       | 40,00       | 40,00       | 40,00          |
| 40,00          | 26,82       | 31,91          | 40,00        | 31,76        | 40,00       | 40,00       | 40,00       | 40,00          |
| 40,00          | 27,92       | 35,62          | 40,00        | 40,00        | 40,00       | 40,00       | 40,00       | 40,00          |
| 40,00          | 26,42       | 33,30          | 33,00        | 31,14        | 40,00       | 33,27       | 40,00       | 40,00          |
| 40,00          | 24,20       | 31,08          | 34,33        | 26,40        | 40,00       | 40,00       | 32,53       | 40,00          |
| 40,00          | 24,04       | 30,02          | 33,80        | 30,39        | 40,00       | 40,00       | 40,00       | 40,00          |
| 40,00          | 26,21       | 40,00          | 34,51        | 31,42        | 40,00       | 40,00       | 40,00       | 40,00          |
| 40,00          | 27,78       | 40,00          | 40,00        | 32,45        | 40,00       | 40,00       | 40,00       | 40,00          |
| 40,00          | 26,17       | 40,00          | 40,00        | 31,57        | 40,00       | 40,00       | 40,00       | 40,00          |
| 40,00          | 25,89       | 33,20          | 40,00        | 33,33        | 40,00       | 40,00       | 40,00       | 40,00          |
| 40,00          | 28,84       | 40,00          | 36,09        | 40,00        | 40,00       | 40,00       | 40,00       | 40,00          |
| 40,00          | 27,56       | 40,00          | 40,00        | 32,80        | 40,00       | 40,00       | 40,00       | 40,00          |
| 40,00          | 28,25       | 35,85          | 40,00        | 40,00        | 40,00       | 40,00       | 40,00       | 40,00          |
| 40,00          | 27,81       | 40,00          | 40,00        | 40,00        | 40,00       | 40,00       | 40,00       | 40,00          |
| 40,00          | 27,60       | 35,70          | 40,00        | 35,15        | 40,00       | 40,00       | 40,00       | 40,00          |
| 40,00          | 27,06       | 37,93          | 40,00        | 40,00        | 40,00       | 40,00       | 40,00       | 40,00          |
| 40,00          | 28,61       | 40,00          | 33,59        | 34,03        | 40,00       | 40,00       | 40,00       | 40,00          |
| 40,00          | 26,16       | 31,57          | 40,00        | 32,69        | 40,00       | 40,00       | 40,00       | 40,00          |
| 40,00          | 25,41       | 30,28          | 40,00        | 40,00        | 40,00       | 40,00       | 40,00       | 40,00          |
| 40,00          | 25,92       | 30,49          | 34,64        | 31,79        | 40,00       | 40,00       | 40,00       | 40,00          |
| 40,00          | 26,73       | 31,59          | 38,30        | 31,80        | 40,00       | 33,21       | 40,00       | 40,00          |
| 40,00          | 26,87       | 33,94          | 40,00        | 33,62        | 40,00       | 40,00       | 40,00       | 40,00          |
| 40,00          | 24,67       | 29,43          | 40,00        | 31,63        | 40,00       | 40,00       | 40,00       | 40,00          |
| 40,00          | 26,95       | 31,63          | 37,62        | 30,88        | 40,00       | 40,00       | 40,00       | 40,00          |
| 40,00          | 28,86       | 40,00          | 40,00        | 31,80        | 40,00       | 40,00       | 40,00       | 40,00          |
| 40,00          | 27,75       | 35,35          | 40,00        | 30,62        | 40,00       | 40,00       | 40,00       | 40,00          |
| 40,00          | 26,02       | 30,51          | 38,60        | 29,56        | 40,00       | 34,14       | 40,00       | 40,00          |
| 40,00          | 28,09       | 31,73          | 40,00        | 29,57        | 40,00       | 40,00       | 40,00       | 40,00          |
| 38,56          | 27,03       | 32,57          | 40,00        | 28,46        | 40,00       | 40,00       | 40,00       | 40,00          |
| 40,00          | 26,03       | 30,83          | 40,00        | 29,59        | 40,00       | 40,00       | 40,00       | 40,00          |
| 40,00          | 26,65       | 33,56          | 40,00        | 33,00        | 40,00       | 40,00       | 40,00       | 40,00          |
| 40,00          | 26,83       | 34,00          | 34,68        | 29,97        | 40,00       | 36,03       | 40,00       | 40,00          |
| 40,00          | 26,62       | 32,08          | 37,87        | 31,80        | 40,00       | 40,00       | 40,00       | 40,00          |
| 40,00          | 26,44       | 30,50          | 40,00        | 32,85        | 40,00       | 40,00       | 40,00       | 40,00          |
| 40,00          | 25,78       | 31,88          | 40,00        | 32,87        | 40,00       | 40,00       | 40,00       | 40,00          |
| 40,00          | 26,46       | 31,32          | 34,62        | 30,31        | 40,00       | 40,00       | 40,00       | 40,00          |
| 40,00          | 26,96       | 30,48          | 40,00        | 31,51        | 40,00       | 40,00       | 40,00       | 40,00          |
| 40,00          | 26,85       | 31,67          | 38,12        | 32,93        | 40,00       | 33,51       | 40,00       | 40,00          |

| hsa-miR-492 | hsa-miR-493 | hsa-miR-494 | hsa-miR-499-3p | hsa-miR-500 | hsa-miR-501 | hsa-miR-501-3p | hsa-miR-502 | hsa-miR-502-3p | hsa-miR-503 |
|-------------|-------------|-------------|----------------|-------------|-------------|----------------|-------------|----------------|-------------|
| 40,00       | 33,38       | 32,51       | 40,00          | 40,00       | 40,00       | 40,00          | 40,00       | 34,64          | 40,00       |
| 40,00       | 40,00       | 40,00       | 40,00          | 40,00       | 40,00       | 40,00          | 40,00       | 40,00          | 40,00       |
| 40,00       | 40,00       | 31,72       | 40,00          | 40,00       | 40,00       | 40,00          | 40,00       | 40,00          | 40,00       |
| 40,00       | 31,95       | 31,24       | 40,00          | 40,00       | 32,34       | 40,00          | 40,00       | 32,98          | 40,00       |
| 40,00       | 32,57       | 31,05       | 40,00          | 40,00       | 40,00       | 40,00          | 40,00       | 40,00          | 40,00       |
| 40,00       | 40,00       | 40,00       | 40,00          | 40,00       | 40,00       | 40,00          | 40,00       | 40,00          | 40,00       |
| 40,00       | 40,00       | 33,45       | 40,00          | 40,00       | 40,00       | 40,00          | 40,00       | 40,00          | 40,00       |
| 40,00       | 33,80       | 29,09       | 40,00          | 40,00       | 40,00       | 40,00          | 40,00       | 32,59          | 40,00       |
| 40,00       | 27,81       | 25,18       | 40,00          | 31,87       | 40,00       | 35,47          | 37,56       | 31,76          | 40,00       |
| 40,00       | 31,67       | 27,98       | 40,00          | 31,05       | 33,16       | 40,00          | 40,00       | 31,57          | 40,00       |
| 40,00       | 30,97       | 31,47       | 40,00          | 40,00       | 40,00       | 40,00          | 40,00       | 33,22          | 40,00       |
| 40,00       | 33,12       | 30,49       | 40,00          | 40,00       | 40,00       | 40,00          | 40,00       | 40,00          | 40,00       |
| 40,00       | 30,36       | 29,31       | 40,00          | 40,00       | 40,00       | 40,00          | 40,00       | 40,00          | 40,00       |
| 40,00       | 32,90       | 32,09       | 40,00          | 40,00       | 40,00       | 40,00          | 40,00       | 40,00          | 40,00       |
| 40,00       | 40,00       | 33,50       | 40,00          | 40,00       | 40,00       | 40,00          | 40,00       | 40,00          | 40,00       |
| 40,00       | 40,00       | 30,80       | 40,00          | 40,00       | 40,00       | 40,00          | 40,00       | 33,19          | 40,00       |
| 40,00       | 33,88       | 32,62       | 40,00          | 35,60       | 40,00       | 34,92          | 40,00       | 33,72          | 40,00       |
| 40,00       | 40,00       | 33,49       | 40,00          | 40,00       | 40,00       | 40,00          | 40,00       | 34,80          | 40,00       |
| 40,00       | 40,00       | 31,11       | 40,00          | 40,00       | 40,00       | 40,00          | 40,00       | 40,00          | 40,00       |
| 40,00       | 34,19       | 40,00       | 40,00          | 40,00       | 40,00       | 40,00          | 37,16       | 40,00          | 40,00       |
| 40,00       | 34,46       | 33,28       | 40,00          | 40,00       | 40,00       | 40,00          | 40,00       | 34,58          | 40,00       |
| 40,00       | 40,00       | 31,56       | 40,00          | 40,00       | 40,00       | 40,00          | 40,00       | 40,00          | 40,00       |
| 40,00       | 40,00       | 33,08       | 40,00          | 40,00       | 40,00       | 40,00          | 40,00       | 34,97          | 40,00       |
| 40,00       | 40,00       | 30,58       | 40,00          | 40,00       | 40,00       | 35,13          | 40,00       | 33,27          | 40,00       |
| 40,00       | 40,00       | 30,28       | 40,00          | 31,75       | 40,00       | 40,00          | 40,00       | 34,18          | 40,00       |
| 40,00       | 40,00       | 31,71       | 40,00          | 40,00       | 40,00       | 40,00          | 40,00       | 33,41          | 40,00       |
| 40,00       | 34,47       | 31,35       | 40,00          | 40,00       | 40,00       | 36,57          | 40,00       | 33,16          | 40,00       |
| 40,00       | 33,23       | 29,56       | 40,00          | 35,88       | 40,00       | 35,92          | 40,00       | 32,10          | 40,00       |
| 40,00       | 40,00       | 30,87       | 40,00          | 40,00       | 40,00       | 40,00          | 40,00       | 34,39          | 40,00       |
| 40,00       | 32,62       | 30,63       | 40,00          | 40,00       | 40,00       | 36,66          | 34,42       | 33,34          | 40,00       |
| 40,00       | 34,65       | 29,05       | 40,00          | 38,76       | 40,00       | 40,00          | 33,44       | 32,16          | 40,00       |
| 40,00       | 34,00       | 29,90       | 40,00          | 34,27       | 40,00       | 35,40          | 37,40       | 33,55          | 40,00       |
| 40,00       | 31,21       | 27,97       | 40,00          | 34,26       | 40,00       | 40,00          | 40,00       | 32,40          | 40,00       |
| 40,00       | 33,18       | 29,01       | 40,00          | 40,00       | 40,00       | 40,00          | 40,00       | 32,67          | 40,00       |
| 40,00       | 40,00       | 32,46       | 40,00          | 40,00       | 40,00       | 40,00          | 40,00       | 36,36          | 40,00       |
| 40,00       | 33,69       | 29,42       | 40,00          | 40,00       | 40,00       | 40,00          | 40,00       | 34,76          | 40,00       |
| 40,00       | 34,27       | 33,35       | 40,00          | 36,41       | 40,00       | 40,00          | 40,00       | 40,00          | 40,00       |
| 40,00       | 40,00       | 31,21       | 40,00          | 40,00       | 40,00       | 38,73          | 40,00       | 34,73          | 40,00       |
| 40,00       | 33,05       | 32,56       | 40,00          | 37,75       | 40,00       | 40,00          | 40,00       | 32,70          | 40,00       |
| 40,00       | 34,74       | 29,14       | 40,00          | 40,00       | 40,00       | 40,00          | 40,00       | 40,00          | 40,00       |
| 38,99       | 40,00       | 30,21       | 40,00          | 40,00       | 40,00       | 40,00          | 40,00       | 35,99          | 40,00       |
| 40,00       | 40,00       | 36,02       | 40,00          | 40,00       | 40,00       | 40,00          | 40,00       | 38,66          | 40,00       |







| hsa-miR-517b | hsa-miR-517c | hsa-miR-518a-3p | hsa-miR-518a-5p | hsa-miR-518b | hsa-miR-518c | hsa-miR-518d | hsa-miR-518d-5p | hsa-miR-518e |
|--------------|--------------|-----------------|-----------------|--------------|--------------|--------------|-----------------|--------------|
| 40,00        | 40,00        | 40,00           | 40,00           | 40,00        | 40,00        | 40,00        | 40,00           | 40,00        |
| 40,00        | 40,00        | 40,00           | 40,00           | 40,00        | 40,00        | 40,00        | 40,00           | 40,00        |
| 40,00        | 37,18        | 40,00           | 40,00           | 40,00        | 40,00        | 40,00        | 40,00           | 40,00        |
| 40,00        | 40,00        | 40,00           | 40,00           | 40,00        | 40,00        | 40,00        | 40,00           | 40,00        |
| 40,00        | 40,00        | 40,00           | 40,00           | 40,00        | 40,00        | 40,00        | 40,00           | 40,00        |
| 40,00        | 40,00        | 40,00           | 40,00           | 40,00        | 40,00        | 39,24        | 40,00           | 40,00        |
| 40,00        | 40,00        | 40,00           | 40,00           | 40,00        | 40,00        | 40,00        | 40,00           | 40,00        |
| 40,00        | 40,00        | 40,00           | 40,00           | 40,00        | 40,00        | 40,00        | 40,00           | 40,00        |
| 40,00        | 40,00        | 40,00           | 40,00           | 40,00        | 40,00        | 40,00        | 40,00           | 40,00        |
| 40,00        | 40,00        | 40,00           | 40,00           | 40,00        | 40,00        | 40,00        | 40,00           | 40,00        |
| 40,00        | 38,28        | 40,00           | 40,00           | 40,00        | 40,00        | 40,00        | 40,00           | 40,00        |
| 40,00        | 40,00        | 40,00           | 40,00           | 40,00        | 40,00        | 40,00        | 40,00           | 40,00        |
| 40,00        | 40,00        | 40,00           | 40,00           | 40,00        | 40,00        | 37,05        | 40,00           | 40,00        |
| 40,00        | 36,78        | 40,00           | 40,00           | 40,00        | 40,00        | 40,00        | 40,00           | 40,00        |
| 40,00        | 40,00        | 40,00           | 40,00           | 40,00        | 40,00        | 36,07        | 40,00           | 40,00        |
| 40,00        | 40,00        | 40,00           | 40,00           | 40,00        | 40,00        | 40,00        | 40,00           | 40,00        |
| 40,00        | 40,00        | 40,00           | 40,00           | 40,00        | 40,00        | 40,00        | 40,00           | 40,00        |
| 40,00        | 40,00        | 40,00           | 40,00           | 40,00        | 40,00        | 40,00        | 40,00           | 40,00        |
| 40,00        | 40,00        | 40,00           | 40,00           | 31,04        | 40,00        | 40,00        | 40,00           | 40,00        |
| 40,00        | 40,00        | 40,00           | 40,00           | 30,84        | 40,00        | 40,00        | 40,00           | 40,00        |
| 40,00        | 40,00        | 40,00           | 40,00           | 32,89        | 40,00        | 40,00        | 40,00           | 40,00        |
| 40,00        | 40,00        | 40,00           | 40,00           | 30,78        | 40,00        | 40,00        | 40,00           | 40,00        |
| 40,00        | 40,00        | 40,00           | 40,00           | 28,39        | 40,00        | 40,00        | 40,00           | 40,00        |
| 40,00        | 33,94        | 40,00           | 40,00           | 29,38        | 40,00        | 40,00        | 40,00           | 40,00        |
| 40,00        | 40,00        | 40,00           | 40,00           | 28,54        | 40,00        | 40,00        | 40,00           | 40,00        |
| 40,00        | 40,00        | 40,00           | 40,00           | 29,40        | 40,00        | 36,78        | 40,00           | 40,00        |
| 40,00        | 36,52        | 40,00           | 40,00           | 29,75        | 40,00        | 40,00        | 40,00           | 33,08        |
| 40,00        | 40,00        | 40,00           | 40,00           | 34,38        | 40,00        | 40,00        | 40,00           | 40,00        |
| 40,00        | 40,00        | 40,00           | 40,00           | 33,16        | 40,00        | 40,00        | 40,00           | 40,00        |
| 40,00        | 40,00        | 40,00           | 40,00           | 35,13        | 40,00        | 40,00        | 40,00           | 34,20        |
| 40,00        | 34,30        | 40,00           | 40,00           | 32,76        | 40,00        | 40,00        | 40,00           | 40,00        |
| 33,05        | 40,00        | 40,00           | 37,51           | 32,88        | 40,00        | 40,00        | 40,00           | 40,00        |
| 40,00        | 40,00        | 40,00           | 40,00           | 31,44        | 40,00        | 40,00        | 40,00           | 40,00        |
| 40,00        | 40,00        | 40,00           | 40,00           | 32,84        | 40,00        | 40,00        | 40,00           | 40,00        |
| 40,00        | 40,00        | 40,00           | 40,00           | 29,69        | 40,00        | 40,00        | 40,00           | 40,00        |
| 40,00        | 40,00        | 40,00           | 40,00           | 29,94        | 40,00        | 40,00        | 40,00           | 40,00        |
| 40,00        | 40,00        | 40,00           | 40,00           | 32,37        | 40,00        | 40,00        | 40,00           | 40,00        |
| 40,00        | 40,00        | 40,00           | 40,00           | 31,80        | 40,00        | 38,32        | 40,00           | 40,00        |
| 40,00        | 35,39        | 40,00           | 40,00           | 30,02        | 40,00        | 40,00        | 40,00           | 40,00        |
| 40,00        | 40,00        | 40,00           | 40,00           | 32,81        | 40,00        | 40,00        | 40,00           | 40,00        |
| 40,00        | 40,00        | 40,00           | 40,00           | 28,21        | 40,00        | 40,00        | 40,00           | 40,00        |
| 40,00        | 40,00        | 40,00           | 40,00           | 33,47        | 40,00        | 40,00        | 40,00           | 40,00        |





| hsa-miR-526b | hsa-miR-532 | hsa-miR-532-3p | hsa-miR-539 | hsa-miR-541 | hsa-miR-542-3p | hsa-miR-542-5p | hsa-miR-544 | hsa-miR-545 |
|--------------|-------------|----------------|-------------|-------------|----------------|----------------|-------------|-------------|
| 40,00        | 30,56       | 31,08          | 31,27       | 40,00       | 40,00          | 40,00          | 40,00       | 31,03       |
| 40,00        | 31,58       | 32,26          | 30,00       | 40,00       | 40,00          | 40,00          | 40,00       | 40,00       |
| 40,00        | 29,14       | 31,85          | 28,28       | 40,00       | 40,00          | 40,00          | 40,00       | 32,53       |
| 40,00        | 27,06       | 30,36          | 27,51       | 40,00       | 40,00          | 40,00          | 40,00       | 34,89       |
| 40,00        | 29,26       | 31,24          | 27,72       | 40,00       | 40,00          | 40,00          | 40,00       | 40,00       |
| 40,00        | 29,75       | 32,33          | 28,83       | 40,00       | 40,00          | 40,00          | 40,00       | 33,03       |
| 40,00        | 32,42       | 31,62          | 31,29       | 40,00       | 40,00          | 40,00          | 40,00       | 40,00       |
| 40,00        | 28,69       | 30,28          | 29,62       | 33,49       | 40,00          | 40,00          | 40,00       | 31,19       |
| 40,00        | 25,82       | 27,14          | 24,32       | 32,04       | 32,96          | 35,91          | 33,70       | 29,65       |
| 40,00        | 25,98       | 27,46          | 27,81       | 40,00       | 40,00          | 35,85          | 40,00       | 28,95       |
| 40,00        | 29,18       | 29,53          | 30,80       | 40,00       | 40,00          | 40,00          | 40,00       | 40,00       |
| 40,00        | 30,41       | 30,58          | 29,38       | 40,00       | 40,00          | 40,00          | 40,00       | 40,00       |
| 40,00        | 27,36       | 28,61          | 28,37       | 40,00       | 40,00          | 40,00          | 40,00       | 31,03       |
| 40,00        | 28,85       | 31,20          | 32,58       | 40,00       | 40,00          | 40,00          | 40,00       | 34,42       |
| 40,00        | 30,11       | 32,79          | 31,02       | 40,00       | 40,00          | 40,00          | 40,00       | 30,94       |
| 40,00        | 30,61       | 32,08          | 32,13       | 40,00       | 40,00          | 40,00          | 40,00       | 40,00       |
| 40,00        | 30,99       | 31,91          | 32,41       | 40,00       | 40,00          | 40,00          | 40,00       | 40,00       |
| 40,00        | 40,00       | 33,96          | 40,00       | 40,00       | 40,00          | 40,00          | 40,00       | 40,00       |
| 40,00        | 30,22       | 31,26          | 30,73       | 40,00       | 40,00          | 40,00          | 40,00       | 32,51       |
| 40,00        | 32,55       | 31,86          | 32,29       | 40,00       | 40,00          | 40,00          | 40,00       | 40,00       |
| 40,00        | 31,28       | 33,21          | 30,19       | 40,00       | 40,00          | 40,00          | 40,00       | 40,00       |
| 40,00        | 29,04       | 30,89          | 31,33       | 40,00       | 40,00          | 40,00          | 40,00       | 40,00       |
| 40,00        | 27,31       | 29,99          | 31,68       | 40,00       | 40,00          | 40,00          | 40,00       | 40,00       |
| 40,00        | 27,64       | 29,76          | 30,14       | 40,00       | 40,00          | 36,22          | 40,00       | 31,83       |
| 40,00        | 26,74       | 28,66          | 33,16       | 40,00       | 40,00          | 40,00          | 40,00       | 33,20       |
| 40,00        | 29,18       | 31,10          | 33,62       | 40,00       | 40,00          | 40,00          | 40,00       | 35,87       |
| 40,00        | 26,04       | 28,46          | 33,13       | 40,00       | 40,00          | 40,00          | 40,00       | 40,00       |
| 40,00        | 26,89       | 29,23          | 29,23       | 40,00       | 40,00          | 40,00          | 40,00       | 34,69       |
| 40,00        | 29,73       | 31,42          | 30,30       | 40,00       | 40,00          | 40,00          | 40,00       | 32,72       |
| 40,00        | 28,31       | 29,07          | 30,32       | 40,00       | 40,00          | 40,00          | 40,00       | 40,00       |
| 40,00        | 26,35       | 28,17          | 29,24       | 40,00       | 40,00          | 37,81          | 40,00       | 32,76       |
| 40,00        | 26,25       | 28,28          | 29,65       | 40,00       | 40,00          | 40,00          | 40,00       | 33,61       |
| 40,00        | 26,79       | 27,72          | 26,69       | 40,00       | 40,00          | 40,00          | 40,00       | 33,70       |
| 40,00        | 26,62       | 28,50          | 28,99       | 38,24       | 40,00          | 40,00          | 40,00       | 33,71       |
| 40,00        | 28,61       | 30,89          | 33,30       | 40,00       | 40,00          | 40,00          | 40,00       | 40,00       |
| 40,00        | 28,59       | 30,22          | 28,31       | 40,00       | 40,00          | 40,00          | 40,00       | 31,98       |
| 40,00        | 28,00       | 29,49          | 30,08       | 40,00       | 40,00          | 40,00          | 40,00       | 40,00       |
| 40,00        | 28,40       | 30,09          | 31,82       | 40,00       | 40,00          | 40,00          | 40,00       | 32,21       |
| 40,00        | 27,06       | 28,99          | 33,52       | 40,00       | 40,00          | 35,78          | 40,00       | 40,00       |
| 40,00        | 27,48       | 28,75          | 27,93       | 38,02       | 40,00          | 40,00          | 40,00       | 34,28       |
| 24,44        | 28,59       | 29,75          | 30,92       | 40,00       | 40,00          | 40,00          | 40,00       | 35,77       |
| 40,00        | 30,09       | 32,50          | 32,58       | 40,00       | 40,00          | 40,00          | 40,00       | 40,00       |

| hsa-miR-548a | hsa-miR-548a-5p | hsa-miR-548b | hsa-miR-548b-5p | hsa-miR-548c | hsa-miR-548c-5p | hsa-miR-548d | hsa-miR-548d-5p | hsa-miR-551b |
|--------------|-----------------|--------------|-----------------|--------------|-----------------|--------------|-----------------|--------------|
| 40,00        | 40,00           | 40,00        | 40,00           | 40,00        | 40,00           | 40,00        | 40,00           | 40,00        |
| 40,00        | 40,00           | 40,00        | 40,00           | 40,00        | 40,00           | 40,00        | 40,00           | 40,00        |
| 40,00        | 40,00           | 40,00        | 40,00           | 40,00        | 40,00           | 40,00        | 40,00           | 40,00        |
| 40,00        | 40,00           | 40,00        | 40,00           | 33,68        | 40,00           | 40,00        | 40,00           | 40,00        |
| 40,00        | 40,00           | 40,00        | 40,00           | 40,00        | 40,00           | 40,00        | 34,98           | 40,00        |
| 40,00        | 40,00           | 40,00        | 40,00           | 40,00        | 40,00           | 40,00        | 40,00           | 40,00        |
| 40,00        | 40,00           | 40,00        | 40,00           | 40,00        | 40,00           | 40,00        | 40,00           | 40,00        |
| 40,00        | 40,00           | 40,00        | 40,00           | 40,00        | 40,00           | 40,00        | 40,00           | 40,00        |
| 40,00        | 38,34           | 40,00        | 38,61           | 33,51        | 33,43           | 40,00        | 32,35           | 32,54        |
| 40,00        | 40,00           | 40,00        | 40,00           | 40,00        | 40,00           | 33,73        | 40,00           | 33,76        |
| 40,00        | 40,00           | 40,00        | 40,00           | 40,00        | 40,00           | 40,00        | 40,00           | 40,00        |
| 40,00        | 40,00           | 40,00        | 40,00           | 36,72        | 40,00           | 33,52        | 40,00           | 40,00        |
| 40,00        | 40,00           | 40,00        | 40,00           | 40,00        | 33,34           | 40,00        | 33,99           | 40,00        |
| 40,00        | 40,00           | 40,00        | 40,00           | 40,00        | 40,00           | 40,00        | 40,00           | 40,00        |
| 40,00        | 40,00           | 40,00        | 40,00           | 40,00        | 40,00           | 40,00        | 40,00           | 40,00        |
| 40,00        | 40,00           | 40,00        | 40,00           | 40,00        | 33,28           | 40,00        | 36,21           | 33,74        |
| 40,00        | 40,00           | 40,00        | 40,00           | 40,00        | 40,00           | 40,00        | 37,98           | 40,00        |
| 40,00        | 40,00           | 40,00        | 40,00           | 40,00        | 40,00           | 40,00        | 40,00           | 40,00        |
| 40,00        | 40,00           | 40,00        | 40,00           | 33,79        | 40,00           | 40,00        | 40,00           | 40,00        |
| 40,00        | 40,00           | 40,00        | 40,00           | 33,73        | 40,00           | 40,00        | 40,00           | 40,00        |
| 40,00        | 40,00           | 40,00        | 40,00           | 34,64        | 40,00           | 40,00        | 40,00           | 40,00        |
| 40,00        | 40,00           | 40,00        | 40,00           | 40,00        | 40,00           | 40,00        | 40,00           | 40,00        |
| 40,00        | 40,00           | 40,00        | 40,00           | 40,00        | 40,00           | 40,00        | 40,00           | 40,00        |
| 40,00        | 40,00           | 40,00        | 40,00           | 40,00        | 34,14           | 40,00        | 33,70           | 40,00        |
| 40,00        | 40,00           | 40,00        | 40,00           | 40,00        | 40,00           | 40,00        | 33,46           | 40,00        |
| 40,00        | 40,00           | 40,00        | 40,00           | 33,96        | 40,00           | 40,00        | 40,00           | 40,00        |
| 36,16        | 40,00           | 40,00        | 40,00           | 40,00        | 40,00           | 40,00        | 40,00           | 40,00        |
| 40,00        | 40,00           | 40,00        | 40,00           | 40,00        | 34,43           | 40,00        | 40,00           | 34,55        |
| 33,65        | 40,00           | 40,00        | 40,00           | 40,00        | 40,00           | 40,00        | 40,00           | 40,00        |
| 40,00        | 40,00           | 40,00        | 40,00           | 40,00        | 40,00           | 40,00        | 40,00           | 33,21        |
| 40,00        | 40,00           | 40,00        | 40,00           | 40,00        | 34,17           | 40,00        | 40,00           | 32,83        |
| 40,00        | 40,00           | 40,00        | 40,00           | 40,00        | 40,00           | 40,00        | 40,00           | 31,55        |
| 40,00        | 40,00           | 40,00        | 40,00           | 40,00        | 33,44           | 40,00        | 40,00           | 33,72        |
| 40,00        | 40,00           | 40,00        | 40,00           | 40,00        | 40,00           | 40,00        | 40,00           | 40,00        |
| 40,00        | 40,00           | 40,00        | 40,00           | 40,00        | 33,96           | 40,00        | 35,77           | 40,00        |
| 40,00        | 40,00           | 40,00        | 40,00           | 40,00        | 34,71           | 40,00        | 34,18           | 40,00        |
| 40,00        | 40,00           | 40,00        | 40,00           | 40,00        | 40,00           | 40,00        | 40,00           | 40,00        |
| 40,00        | 40,00           | 40,00        | 40,00           | 40,00        | 40,00           | 40,00        | 40,00           | 40,00        |
| 40,00        | 40,00           | 40,00        | 39,47           | 34,78        | 33,09           | 34,49        | 33,85           | 34,74        |
| 40,00        | 40,00           | 40,00        | 40,00           | 34,79        | 40,00           | 40,00        | 40,00           | 40,00        |
| 40,00        | 40,00           | 40,00        | 40,00           | 34,81        | 40,00           | 40,00        | 40,00           | 40,00        |
| 40,00        | 40,00           | 40,00        | 40,00           | 34,87        | 40,00           | 40,00        | 40,00           | 40,00        |

| hsa-miR-556-3p | hsa-miR-556-5p | hsa-miR-561 | hsa-miR-570 | hsa-miR-574-3p | hsa-miR-576-3p | hsa-miR-576-5p | hsa-miR-579 | hsa-miR-582-3p |
|----------------|----------------|-------------|-------------|----------------|----------------|----------------|-------------|----------------|
| 40,00          | 40,00          | 40,00       | 40,00       | 25,80          | 40,00          | 40,00          | 40,00       | 40,00          |
| 40,00          | 40,00          | 40,00       | 40,00       | 29,22          | 40,00          | 40,00          | 40,00       | 40,00          |
| 40,00          | 40,00          | 40,00       | 34,30       | 25,22          | 40,00          | 40,00          | 33,71       | 40,00          |
| 40,00          | 40,00          | 40,00       | 40,00       | 23,73          | 34,19          | 32,86          | 40,00       | 40,00          |
| 40,00          | 40,00          | 40,00       | 40,00       | 25,00          | 40,00          | 40,00          | 40,00       | 40,00          |
| 40,00          | 40,00          | 40,00       | 40,00       | 25,87          | 33,56          | 40,00          | 40,00       | 40,00          |
| 40,00          | 40,00          | 40,00       | 40,00       | 26,99          | 40,00          | 40,00          | 40,00       | 40,00          |
| 40,00          | 40,00          | 40,00       | 40,00       | 25,42          | 32,14          | 34,44          | 40,00       | 40,00          |
| 40,00          | 40,00          | 35,43       | 34,61       | 22,47          | 31,15          | 40,00          | 30,01       | 40,00          |
| 40,00          | 40,00          | 40,00       | 33,32       | 23,62          | 40,00          | 37,25          | 29,97       | 40,00          |
| 40,00          | 40,00          | 36,76       | 40,00       | 25,80          | 39,63          | 40,00          | 32,28       | 40,00          |
| 40,00          | 40,00          | 40,00       | 40,00       | 25,88          | 33,56          | 40,00          | 33,34       | 40,00          |
| 40,00          | 40,00          | 36,60       | 40,00       | 24,95          | 33,44          | 40,00          | 31,82       | 40,00          |
| 40,00          | 40,00          | 37,40       | 40,00       | 26,01          | 40,00          | 40,00          | 31,87       | 40,00          |
| 40,00          | 40,00          | 40,00       | 40,00       | 27,34          | 40,00          | 40,00          | 40,00       | 40,00          |
| 40,00          | 40,00          | 40,00       | 40,00       | 27,25          | 40,00          | 40,00          | 40,00       | 40,00          |
| 40,00          | 40,00          | 40,00       | 40,00       | 27,00          | 40,00          | 40,00          | 32,83       | 40,00          |
| 40,00          | 40,00          | 40,00       | 40,00       | 28,31          | 40,00          | 40,00          | 40,00       | 40,00          |
| 40,00          | 40,00          | 40,00       | 40,00       | 26,12          | 33,36          | 40,00          | 33,37       | 40,00          |
| 40,00          | 40,00          | 40,00       | 40,00       | 28,29          | 40,00          | 40,00          | 40,00       | 40,00          |
| 40,00          | 40,00          | 40,00       | 40,00       | 26,78          | 40,00          | 40,00          | 33,57       | 40,00          |
| 40,00          | 40,00          | 40,00       | 40,00       | 26,59          | 38,61          | 40,00          | 33,67       | 40,00          |
| 40,00          | 40,00          | 40,00       | 40,00       | 27,25          | 40,00          | 40,00          | 40,00       | 40,00          |
| 40,00          | 40,00          | 40,00       | 40,00       | 25,55          | 33,26          | 38,51          | 31,96       | 34,74          |
| 40,00          | 40,00          | 40,00       | 40,00       | 26,33          | 40,00          | 40,00          | 32,38       | 40,00          |
| 40,00          | 40,00          | 40,00       | 40,00       | 28,43          | 33,69          | 40,00          | 33,57       | 40,00          |
| 40,00          | 40,00          | 40,00       | 40,00       | 26,09          | 33,75          | 40,00          | 30,77       | 40,00          |
| 40,00          | 40,00          | 37,83       | 40,00       | 25,89          | 33,62          | 40,00          | 31,19       | 40,00          |
| 40,00          | 40,00          | 40,00       | 40,00       | 27,91          | 35,96          | 40,00          | 40,00       | 40,00          |
| 40,00          | 40,00          | 40,00       | 40,00       | 25,94          | 40,00          | 40,00          | 34,44       | 40,00          |
| 40,00          | 40,00          | 40,00       | 40,00       | 25,26          | 31,56          | 40,00          | 30,75       | 40,00          |
| 40,00          | 40,00          | 40,00       | 40,00       | 25,80          | 33,01          | 40,00          | 32,54       | 40,00          |
| 40,00          | 40,00          | 40,00       | 40,00       | 24,91          | 31,98          | 40,00          | 34,61       | 40,00          |
| 40,00          | 40,00          | 40,00       | 40,00       | 25,73          | 32,18          | 36,75          | 34,20       | 40,00          |
| 40,00          | 40,00          | 40,00       | 40,00       | 27,90          | 36,39          | 40,00          | 33,35       | 40,00          |
| 40,00          | 40,00          | 40,00       | 40,00       | 25,76          | 32,91          | 35,04          | 32,56       | 40,00          |
| 40,00          | 40,00          | 40,00       | 40,00       | 24,68          | 40,00          | 40,00          | 40,00       | 40,00          |
| 40,00          | 40,00          | 40,00       | 40,00       | 26,66          | 34,50          | 40,00          | 40,00       | 40,00          |
| 40,00          | 40,00          | 40,00       | 40,00       | 24,97          | 31,60          | 40,00          | 40,00       | 40,00          |
| 40,00          | 40,00          | 40,00       | 35,49       | 24,17          | 33,40          | 40,00          | 32,82       | 40,00          |
| 40,00          | 40,00          | 40,00       | 40,00       | 27,80          | 28,78          | 40,00          | 36,36       | 40,00          |
| 40,00          | 40,00          | 40,00       | 40,00       | 27,75          | 34,68          | 40,00          | 35,40       | 40,00          |

| hsa-miR-582-5p | hsa-miR-589 | hsa-miR-590-5p | hsa-miR-597 | hsa-miR-598 | hsa-miR-615-5p | hsa-miR-616 | hsa-miR-618 | hsa-miR-624 | hsa-miR-625 |
|----------------|-------------|----------------|-------------|-------------|----------------|-------------|-------------|-------------|-------------|
| 40,00          | 40,00       | 28,33          | 40,00       | 30,88       | 40,00          | 40,00       | 40,00       | 40,00       | 35,99       |
| 40,00          | 40,00       | 32,15          | 40,00       | 40,00       | 40,00          | 40,00       | 40,00       | 40,00       | 33,93       |
| 40,00          | 40,00       | 27,98          | 40,00       | 30,50       | 40,00          | 40,00       | 34,01       | 40,00       | 36,13       |
| 40,00          | 40,00       | 26,30          | 40,00       | 29,06       | 40,00          | 33,70       | 40,00       | 40,00       | 30,73       |
| 40,00          | 40,00       | 28,16          | 40,00       | 31,22       | 40,00          | 40,00       | 34,97       | 40,00       | 33,52       |
| 40,00          | 40,00       | 28,64          | 40,00       | 31,26       | 40,00          | 31,58       | 35,29       | 40,00       | 33,35       |
| 40,00          | 40,00       | 29,38          | 40,00       | 32,50       | 40,00          | 40,00       | 31,25       | 40,00       | 40,00       |
| 40,00          | 40,00       | 27,32          | 40,00       | 30,49       | 40,00          | 40,00       | 33,61       | 40,00       | 32,67       |
| 40,00          | 34,39       | 24,57          | 40,00       | 28,12       | 40,00          | 32,76       | 31,36       | 40,00       | 28,91       |
| 40,00          | 33,41       | 24,89          | 31,65       | 28,53       | 40,00          | 32,76       | 34,46       | 40,00       | 30,11       |
| 39,09          | 40,00       | 26,21          | 33,25       | 30,24       | 40,00          | 40,00       | 33,71       | 40,00       | 32,44       |
| 40,00          | 40,00       | 27,35          | 34,87       | 31,43       | 40,00          | 40,00       | 34,46       | 40,00       | 33,43       |
| 40,00          | 40,00       | 25,92          | 40,00       | 29,31       | 40,00          | 32,60       | 32,62       | 40,00       | 31,72       |
| 40,00          | 40,00       | 26,79          | 40,00       | 32,53       | 40,00          | 40,00       | 32,78       | 40,00       | 34,36       |
| 40,00          | 40,00       | 28,18          | 35,65       | 33,39       | 40,00          | 40,00       | 40,00       | 40,00       | 33,98       |
| 40,00          | 40,00       | 27,77          | 40,00       | 31,56       | 40,00          | 33,95       | 34,78       | 40,00       | 34,80       |
| 40,00          | 40,00       | 27,75          | 40,00       | 30,47       | 40,00          | 40,00       | 40,00       | 40,00       | 40,00       |
| 40,00          | 40,00       | 31,02          | 40,00       | 40,00       | 40,00          | 40,00       | 40,00       | 40,00       | 40,00       |
| 40,00          | 40,00       | 28,83          | 40,00       | 32,42       | 40,00          | 33,75       | 35,87       | 40,00       | 33,63       |
| 40,00          | 40,00       | 30,16          | 40,00       | 40,00       | 40,00          | 40,00       | 29,94       | 40,00       | 40,00       |
| 40,00          | 40,00       | 28,36          | 40,00       | 34,53       | 40,00          | 40,00       | 31,30       | 40,00       | 33,91       |
| 40,00          | 40,00       | 28,19          | 40,00       | 30,09       | 40,00          | 40,00       | 31,51       | 40,00       | 35,62       |
| 40,00          | 34,36       | 29,16          | 33,71       | 33,48       | 40,00          | 40,00       | 36,55       | 40,00       | 35,75       |
| 40,00          | 35,37       | 27,33          | 33,55       | 29,81       | 40,00          | 40,00       | 33,08       | 40,00       | 32,32       |
| 40,00          | 33,17       | 27,18          | 32,51       | 30,73       | 40,00          | 40,00       | 34,38       | 40,00       | 33,96       |
| 40,00          | 40,00       | 28,84          | 31,89       | 32,12       | 40,00          | 40,00       | 35,05       | 40,00       | 34,74       |
| 40,00          | 40,00       | 27,13          | 30,94       | 29,96       | 40,00          | 40,00       | 32,41       | 40,00       | 34,03       |
| 40,00          | 40,00       | 27,17          | 34,40       | 30,27       | 40,00          | 35,93       | 33,65       | 40,00       | 35,10       |
| 40,00          | 40,00       | 28,97          | 40,00       | 32,53       | 40,00          | 40,00       | 30,60       | 40,00       | 34,43       |
| 40,00          | 40,00       | 27,51          | 33,45       | 31,33       | 40,00          | 40,00       | 33,89       | 40,00       | 33,21       |
| 40,00          | 35,67       | 25,88          | 31,25       | 29,89       | 40,00          | 40,00       | 30,43       | 40,00       | 31,40       |
| 40,00          | 34,46       | 26,54          | 34,67       | 29,93       | 40,00          | 40,00       | 34,71       | 40,00       | 33,00       |
| 40,00          | 40,00       | 25,86          | 33,51       | 28,74       | 40,00          | 33,03       | 33,29       | 40,00       | 31,86       |
| 40,00          | 34,21       | 26,94          | 38,07       | 29,94       | 40,00          | 40,00       | 33,75       | 40,00       | 32,77       |
| 40,00          | 33,56       | 28,93          | 40,00       | 31,95       | 40,00          | 40,00       | 36,60       | 40,00       | 40,00       |
| 40,00          | 40,00       | 27,79          | 33,00       | 29,91       | 40,00          | 34,55       | 33,53       | 40,00       | 33,09       |
| 40,00          | 40,00       | 27,40          | 40,00       | 30,74       | 40,00          | 35,39       | 34,50       | 40,00       | 33,40       |
| 40,00          | 34,62       | 28,66          | 40,00       | 31,82       | 40,00          | 40,00       | 35,23       | 40,00       | 35,09       |
| 40,00          | 34,96       | 26,64          | 33,04       | 29,83       | 40,00          | 40,00       | 35,80       | 40,00       | 32,93       |
| 40,00          | 40,00       | 27,17          | 40,00       | 29,57       | 40,00          | 40,00       | 33,05       | 40,00       | 35,62       |
| 40,00          | 40,00       | 28,52          | 31,36       | 31,01       | 40,00          | 40,00       | 35,17       | 40,00       | 33,80       |
| 40,00          | 40,00       | 29,75          | 40,00       | 32,35       | 40,00          | 40,00       | 31,51       | 40,00       | 34,77       |



| hsa-miR-627 | hsa-miR-628-5p | hsa-miR-629 | hsa-miR-636 | hsa-miR-642 | hsa-miR-651 | hsa-miR-652 | hsa-miR-653 | hsa-miR-654 | hsa-miR-654-3p |
|-------------|----------------|-------------|-------------|-------------|-------------|-------------|-------------|-------------|----------------|
| 40,00       | 40,00          | 40,00       | 40,00       | 40,00       | 40,00       | 33,62       | 40,00       | 40,00       | 40,00          |
| 40,00       | 40,00          | 40,00       | 34,11       | 40,00       | 40,00       | 40,00       | 40,00       | 40,00       | 40,00          |
| 40,00       | 29,66          | 33,37       | 31,52       | 40,00       | 40,00       | 29,88       | 40,00       | 40,00       | 40,00          |
| 40,00       | 28,03          | 37,67       | 31,06       | 40,00       | 40,00       | 27,96       | 40,00       | 40,00       | 40,00          |
| 40,00       | 29,81          | 40,00       | 33,74       | 40,00       | 40,00       | 28,12       | 40,00       | 40,00       | 40,00          |
| 40,00       | 29,37          | 33,77       | 34,21       | 40,00       | 40,00       | 30,11       | 40,00       | 40,00       | 40,00          |
| 40,00       | 29,36          | 40,00       | 34,48       | 40,00       | 40,00       | 30,75       | 40,00       | 40,00       | 40,00          |
| 34,13       | 31,02          | 33,08       | 33,77       | 40,00       | 40,00       | 26,93       | 40,00       | 40,00       | 33,14          |
| 30,91       | 26,58          | 28,64       | 30,06       | 40,00       | 40,00       | 23,76       | 40,00       | 30,87       | 29,63          |
| 33,24       | 28,34          | 33,44       | 30,88       | 31,76       | 40,00       | 24,23       | 40,00       | 40,00       | 32,81          |
| 31,96       | 30,97          | 34,26       | 32,64       | 40,00       | 40,00       | 26,97       | 40,00       | 40,00       | 40,00          |
| 40,00       | 28,81          | 34,74       | 40,00       | 40,00       | 40,00       | 28,09       | 40,00       | 40,00       | 40,00          |
| 40,00       | 27,81          | 30,56       | 32,97       | 40,00       | 40,00       | 25,61       | 40,00       | 40,00       | 32,13          |
| 32,61       | 28,72          | 30,94       | 31,72       | 34,20       | 40,00       | 27,37       | 40,00       | 40,00       | 40,00          |
| 40,00       | 32,62          | 38,94       | 40,00       | 40,00       | 40,00       | 29,57       | 40,00       | 40,00       | 40,00          |
| 40,00       | 26,88          | 31,28       | 32,18       | 40,00       | 40,00       | 28,35       | 40,00       | 40,00       | 40,00          |
| 40,00       | 30,26          | 38,31       | 35,20       | 40,00       | 40,00       | 30,03       | 40,00       | 40,00       | 40,00          |
| 40,00       | 32,62          | 40,00       | 40,00       | 40,00       | 40,00       | 38,03       | 40,00       | 40,00       | 40,00          |
| 33,94       | 29,51          | 33,82       | 40,00       | 40,00       | 40,00       | 28,56       | 40,00       | 40,00       | 32,62          |
| 40,00       | 27,43          | 40,00       | 35,55       | 40,00       | 40,00       | 32,04       | 40,00       | 40,00       | 40,00          |
| 40,00       | 27,19          | 33,94       | 40,00       | 40,00       | 40,00       | 31,85       | 40,00       | 40,00       | 40,00          |
| 34,43       | 25,03          | 35,16       | 39,83       | 33,14       | 40,00       | 27,97       | 40,00       | 38,24       | 40,00          |
| 40,00       | 24,63          | 31,97       | 35,34       | 33,60       | 40,00       | 27,83       | 40,00       | 40,00       | 40,00          |
| 35,13       | 22,24          | 40,00       | 32,89       | 40,00       | 40,00       | 26,88       | 40,00       | 38,04       | 33,78          |
| 40,00       | 24,01          | 33,82       | 34,19       | 32,16       | 40,00       | 25,67       | 40,00       | 39,96       | 40,00          |
| 40,00       | 22,85          | 40,00       | 40,00       | 40,00       | 40,00       | 29,21       | 40,00       | 40,00       | 40,00          |
| 40,00       | 24,85          | 32,30       | 32,60       | 32,47       | 40,00       | 26,83       | 40,00       | 38,80       | 40,00          |
| 40,00       | 24,55          | 32,19       | 40,00       | 34,32       | 40,00       | 26,90       | 40,00       | 33,20       | 34,04          |
| 40,00       | 22,96          | 33,69       | 35,08       | 32,72       | 40,00       | 30,51       | 40,00       | 40,00       | 40,00          |
| 40,00       | 26,89          | 36,47       | 32,55       | 34,27       | 40,00       | 27,40       | 40,00       | 38,77       | 33,97          |
| 34,10       | 23,20          | 31,68       | 34,20       | 33,41       | 40,00       | 25,97       | 40,00       | 34,01       | 32,15          |
| 33,36       | 25,24          | 33,42       | 33,75       | 33,15       | 40,00       | 24,85       | 40,00       | 34,86       | 40,00          |
| 35,31       | 23,56          | 40,00       | 33,81       | 31,84       | 40,00       | 26,05       | 40,00       | 32,55       | 32,82          |
| 40,00       | 24,96          | 35,29       | 33,55       | 33,06       | 40,00       | 25,78       | 40,00       | 32,38       | 40,00          |
| 40,00       | 23,67          | 34,34       | 35,26       | 40,00       | 40,00       | 28,11       | 40,00       | 40,00       | 40,00          |
| 36,91       | 23,08          | 33,51       | 34,22       | 35,14       | 40,00       | 27,56       | 40,00       | 38,01       | 32,76          |
| 34,02       | 24,33          | 32,68       | 34,92       | 34,03       | 40,00       | 27,54       | 40,00       | 40,00       | 40,00          |
| 40,00       | 23,02          | 31,52       | 33,57       | 40,00       | 40,00       | 28,69       | 40,00       | 40,00       | 40,00          |
| 37,76       | 27,20          | 31,09       | 32,59       | 34,08       | 40,00       | 26,43       | 40,00       | 40,00       | 40,00          |
| 31,97       | 25,50          | 35,27       | 33,36       | 35,25       | 40,00       | 26,22       | 40,00       | 32,80       | 40,00          |
| 40,00       | 11,81          | 34,47       | 33,04       | 35,11       | 40,00       | 28,46       | 40,00       | 34,44       | 40,00          |
| 40,00       | 24,08          | 34,60       | 37,76       | 32,80       | 40,00       | 31,01       | 40,00       | 40,00       | 40,00          |

| hsa-miR-655 | hsa-miR-660 | hsa-miR-671-3p | hsa-miR-672 | hsa-miR-674 | hsa-miR-708 | hsa-miR-744 | hsa-miR-758 | hsa-miR-871 | hsa-miR-872 |
|-------------|-------------|----------------|-------------|-------------|-------------|-------------|-------------|-------------|-------------|
| 40,00       | 36,37       | 40,00          | 40,00       | 40,00       | 40,00       | 30,60       | 40,00       | 40,00       | 40,00       |
| 40,00       | 40,00       | 40,00          | 40,00       | 40,00       | 40,00       | 40,00       | 40,00       | 40,00       | 40,00       |
| 40,00       | 29,56       | 32,11          | 40,00       | 40,00       | 40,00       | 28,21       | 33,26       | 40,00       | 40,00       |
| 37,84       | 32,40       | 29,35          | 40,00       | 40,00       | 40,00       | 26,31       | 40,00       | 40,00       | 40,00       |
| 38,72       | 34,52       | 32,34          | 40,00       | 40,00       | 40,00       | 27,69       | 31,26       | 40,00       | 40,00       |
| 40,00       | 30,85       | 31,36          | 40,00       | 40,00       | 40,00       | 29,98       | 33,59       | 40,00       | 40,00       |
| 40,00       | 31,53       | 40,00          | 40,00       | 40,00       | 37,73       | 30,24       | 33,36       | 40,00       | 40,00       |
| 34,28       | 30,64       | 31,97          | 40,00       | 40,00       | 40,00       | 26,73       | 34,76       | 40,00       | 40,00       |
| 31,76       | 25,89       | 28,86          | 40,00       | 40,00       | 40,00       | 24,46       | 31,24       | 40,00       | 40,00       |
| 33,56       | 27,70       | 28,45          | 40,00       | 40,00       | 40,00       | 24,49       | 34,42       | 40,00       | 40,00       |
| 34,68       | 30,65       | 31,40          | 40,00       | 40,00       | 40,00       | 27,12       | 40,00       | 40,00       | 40,00       |
| 40,00       | 29,45       | 32,31          | 40,00       | 40,00       | 40,00       | 28,06       | 33,59       | 40,00       | 40,00       |
| 36,79       | 27,61       | 32,43          | 40,00       | 40,00       | 40,00       | 26,47       | 31,97       | 40,00       | 40,00       |
| 40,00       | 28,23       | 40,00          | 40,00       | 40,00       | 40,00       | 29,55       | 35,43       | 40,00       | 40,00       |
| 38,98       | 33,00       | 31,28          | 40,00       | 40,00       | 40,00       | 29,12       | 40,00       | 40,00       | 40,00       |
| 40,00       | 29,19       | 32,41          | 40,00       | 40,00       | 40,00       | 29,44       | 32,95       | 40,00       | 40,00       |
| 40,00       | 33,25       | 31,79          | 40,00       | 40,00       | 40,00       | 28,60       | 40,00       | 40,00       | 40,00       |
| 40,00       | 36,64       | 40,00          | 40,00       | 40,00       | 40,00       | 29,80       | 40,00       | 40,00       | 40,00       |
| 40,00       | 31,02       | 32,85          | 40,00       | 40,00       | 38,89       | 28,07       | 32,25       | 40,00       | 40,00       |
| 40,00       | 29,99       | 40,00          | 40,00       | 40,00       | 40,00       | 34,26       | 32,93       | 40,00       | 40,00       |
| 40,00       | 30,52       | 31,91          | 40,00       | 40,00       | 40,00       | 29,96       | 36,13       | 40,00       | 40,00       |
| 40,00       | 28,88       | 32,36          | 40,00       | 40,00       | 40,00       | 29,61       | 31,14       | 40,00       | 40,00       |
| 40,00       | 27,73       | 32,05          | 40,00       | 40,00       | 40,00       | 27,93       | 32,97       | 40,00       | 40,00       |
| 40,00       | 27,31       | 31,59          | 40,00       | 40,00       | 40,00       | 27,38       | 31,22       | 40,00       | 40,00       |
| 40,00       | 26,84       | 30,29          | 40,00       | 40,00       | 40,00       | 26,51       | 30,90       | 40,00       | 40,00       |
| 40,00       | 29,03       | 40,00          | 40,00       | 40,00       | 40,00       | 29,89       | 31,65       | 40,00       | 40,00       |
| 40,00       | 26,81       | 30,25          | 40,00       | 40,00       | 35,66       | 27,63       | 32,10       | 40,00       | 40,00       |
| 40,00       | 26,97       | 32,14          | 40,00       | 40,00       | 40,00       | 27,70       | 31,81       | 40,00       | 40,00       |
| 40,00       | 28,61       | 32,43          | 40,00       | 40,00       | 40,00       | 29,64       | 31,31       | 40,00       | 40,00       |
| 40,00       | 27,52       | 31,49          | 40,00       | 40,00       | 33,59       | 27,48       | 32,19       | 40,00       | 40,00       |
| 38,75       | 26,40       | 30,75          | 40,00       | 40,00       | 40,00       | 26,05       | 30,94       | 40,00       | 40,00       |
| 40,00       | 26,62       | 31,04          | 36,19       | 40,00       | 40,00       | 25,39       | 30,47       | 40,00       | 40,00       |
| 36,69       | 27,13       | 29,20          | 40,00       | 40,00       | 34,19       | 25,72       | 30,42       | 40,00       | 40,00       |
| 40,00       | 27,22       | 31,80          | 40,00       | 40,00       | 40,00       | 26,72       | 32,17       | 40,00       | 40,00       |
| 40,00       | 29,00       | 33,27          | 40,00       | 40,00       | 40,00       | 29,71       | 31,67       | 40,00       | 40,00       |
| 36,20       | 27,71       | 31,40          | 40,00       | 40,00       | 40,00       | 28,11       | 30,40       | 40,00       | 40,00       |
| 40,00       | 28,58       | 30,23          | 40,00       | 40,00       | 40,00       | 28,53       | 32,53       | 40,00       | 40,00       |
| 40,00       | 27,71       | 34,73          | 40,00       | 40,00       | 40,00       | 28,94       | 32,94       | 40,00       | 40,00       |
| 40,00       | 27,50       | 30,79          | 40,00       | 40,00       | 40,00       | 27,09       | 31,98       | 40,00       | 40,00       |
| 40,00       | 28,01       | 30,17          | 40,00       | 40,00       | 40,00       | 27,25       | 31,48       | 40,00       | 40,00       |
| 34,69       | 27,93       | 33,19          | 40,00       | 40,00       | 40,00       | 28,80       | 30,78       | 40,00       | 40,00       |
| 40,00       | 28,13       | 33,15          | 40,00       | 40,00       | 40,00       | 30,20       | 32,31       | 40,00       | 40,00       |

| hsa-miR-873 | hsa-miR-874 | hsa-miR-875-3p | hsa-miR-876-3p | hsa-miR-876-5p | hsa-miR-885-3p | hsa-miR-885-5p | hsa-miR-886-3p | hsa-miR-886-5p |
|-------------|-------------|----------------|----------------|----------------|----------------|----------------|----------------|----------------|
| 40,00       | 33,66       | 40,00          | 40,00          | 40,00          | 40,00          | 29,18          | 40,00          | 31,80          |
| 40,00       | 40,00       | 40,00          | 40,00          | 40,00          | 40,00          | 33,78          | 34,21          | 40,00          |
| 40,00       | 40,00       | 40,00          | 40,00          | 40,00          | 40,00          | 28,06          | 34,17          | 32,21          |
| 40,00       | 40,00       | 40,00          | 40,00          | 40,00          | 40,00          | 34,92          | 40,00          | 29,78          |
| 40,00       | 40,00       | 40,00          | 40,00          | 40,00          | 40,00          | 30,03          | 40,00          | 30,73          |
| 40,00       | 40,00       | 40,00          | 40,00          | 40,00          | 40,00          | 30,75          | 40,00          | 31,81          |
| 40,00       | 40,00       | 40,00          | 40,00          | 40,00          | 40,00          | 31,09          | 40,00          | 32,50          |
| 40,00       | 40,00       | 40,00          | 40,00          | 40,00          | 40,00          | 28,85          | 32,66          | 29,36          |
| 40,00       | 40,00       | 40,00          | 40,00          | 40,00          | 40,00          | 29,40          | 31,94          | 28,38          |
| 40,00       | 40,00       | 40,00          | 40,00          | 40,00          | 40,00          | 29,44          | 34,06          | 28,59          |
| 40,00       | 40,00       | 40,00          | 40,00          | 40,00          | 40,00          | 31,21          | 40,00          | 30,21          |
| 40,00       | 40,00       | 40,00          | 40,00          | 40,00          | 40,00          | 28,55          | 40,00          | 31,34          |
| 40,00       | 40,00       | 40,00          | 40,00          | 40,00          | 40,00          | 28,73          | 40,00          | 30,36          |
| 40,00       | 40,00       | 40,00          | 40,00          | 40,00          | 40,00          | 27,99          | 32,76          | 31,45          |
| 40,00       | 40,00       | 40,00          | 40,00          | 40,00          | 40,00          | 34,53          | 40,00          | 31,25          |
| 40,00       | 40,00       | 40,00          | 40,00          | 40,00          | 40,00          | 29,92          | 40,00          | 30,66          |
| 40,00       | 40,00       | 40,00          | 40,00          | 40,00          | 40,00          | 40,00          | 34,06          | 30,50          |
| 40,00       | 40,00       | 40,00          | 40,00          | 40,00          | 40,00          | 32,35          | 40,00          | 34,02          |
| 40,00       | 40,00       | 40,00          | 40,00          | 40,00          | 40,00          | 30,63          | 40,00          | 31,51          |
| 40,00       | 40,00       | 40,00          | 40,00          | 40,00          | 40,00          | 31,99          | 40,00          | 32,09          |
| 40,00       | 40,00       | 40,00          | 40,00          | 40,00          | 40,00          | 30,08          | 40,00          | 32,99          |
| 40,00       | 40,00       | 40,00          | 40,00          | 40,00          | 40,00          | 28,21          | 31,88          | 31,71          |
| 40,00       | 40,00       | 40,00          | 40,00          | 40,00          | 40,00          | 28,07          | 40,00          | 30,90          |
| 40,00       | 40,00       | 40,00          | 40,00          | 40,00          | 40,00          | 27,77          | 32,68          | 30,54          |
| 40,00       | 33,31       | 40,00          | 40,00          | 40,00          | 40,00          | 27,69          | 38,24          | 30,97          |
| 40,00       | 34,80       | 40,00          | 40,00          | 40,00          | 40,00          | 28,14          | 33,77          | 40,00          |
| 40,00       | 32,79       | 40,00          | 40,00          | 40,00          | 40,00          | 26,27          | 40,00          | 30,80          |
| 40,00       | 40,00       | 40,00          | 40,00          | 40,00          | 40,00          | 30,80          | 40,00          | 30,30          |
| 40,00       | 31,31       | 40,00          | 40,00          | 40,00          | 40,00          | 31,24          | 40,00          | 34,12          |
| 40,00       | 40,00       | 40,00          | 40,00          | 40,00          | 40,00          | 27,55          | 40,00          | 32,70          |
| 40,00       | 40,00       | 40,00          | 40,00          | 40,00          | 40,00          | 27,50          | 40,00          | 30,63          |
| 40,00       | 27,54       | 40,00          | 40,00          | 40,00          | 40,00          | 30,58          | 33,14          | 29,87          |
| 40,00       | 40,00       | 40,00          | 36,72          | 40,00          | 40,00          | 28,74          | 32,86          | 31,07          |
| 40,00       | 40,00       | 40,00          | 40,00          | 40,00          | 40,00          | 28,14          | 33,08          | 29,45          |
| 40,00       | 40,00       | 40,00          | 40,00          | 40,00          | 40,00          | 28,92          | 33,31          | 33,48          |
| 40,00       | 35,37       | 40,00          | 40,00          | 40,00          | 40,00          | 30,21          | 34,60          | 33,09          |
| 40,00       | 40,00       | 40,00          | 40,00          | 40,00          | 40,00          | 29,13          | 33,35          | 31,11          |
| 40,00       | 40,00       | 40,00          | 40,00          | 40,00          | 40,00          | 27,91          | 33,07          | 31,21          |
| 40,00       | 31,32       | 40,00          | 40,00          | 40,00          | 40,00          | 25,49          | 32,17          | 29,63          |
| 40,00       | 34,13       | 40,00          | 40,00          | 40,00          | 40,00          | 28,93          | 32,08          | 29,13          |
| 40,00       | 40,00       | 40,00          | 40,00          | 40,00          | 40,00          | 29,06          | 34,71          | 33,07          |
| 40,00       | 33,72       | 40,00          | 40,00          | 40,00          | 40,00          | 29,12          | 32,43          | 33,16          |

| hsa-miR-887 | hsa-miR-888 | hsa-miR-889 | hsa-miR-890 | hsa-miR-891a | hsa-miR-891b | hsa-miR-892a | hsa-miR-9 | hsa-miR-92a | hsa-miR-95 |
|-------------|-------------|-------------|-------------|--------------|--------------|--------------|-----------|-------------|------------|
| 40,00       | 40,00       | 33,48       | 40,00       | 40,00        | 40,00        | 40,00        | 40,00     | 25,82       | 40,00      |
| 40,00       | 40,00       | 40,00       | 40,00       | 40,00        | 40,00        | 40,00        | 40,00     | 27,58       | 40,00      |
| 40,00       | 40,00       | 32,99       | 40,00       | 40,00        | 40,00        | 40,00        | 40,00     | 24,92       | 40,00      |
| 40,00       | 40,00       | 40,00       | 40,00       | 40,00        | 40,00        | 40,00        | 32,85     | 22,90       | 40,00      |
| 40,00       | 40,00       | 40,00       | 40,00       | 40,00        | 40,00        | 40,00        | 40,00     | 24,00       | 33,31      |
| 40,00       | 40,00       | 34,91       | 40,00       | 40,00        | 40,00        | 40,00        | 40,00     | 24,40       | 40,00      |
| 40,00       | 40,00       | 33,11       | 40,00       | 40,00        | 40,00        | 40,00        | 40,00     | 25,58       | 32,51      |
| 40,00       | 40,00       | 32,37       | 40,00       | 40,00        | 40,00        | 40,00        | 40,00     | 21,47       | 40,00      |
| 40,00       | 40,00       | 28,47       | 40,00       | 40,00        | 40,00        | 40,00        | 40,00     | 34,67       | 19,83      |
| 40,00       | 40,00       | 31,17       | 40,00       | 40,00        | 40,00        | 40,00        | 40,00     | 40,00       | 20,02      |
| 40,00       | 40,00       | 35,19       | 40,00       | 40,00        | 40,00        | 40,00        | 40,00     | 40,00       | 21,92      |
| 40,00       | 40,00       | 32,31       | 40,00       | 40,00        | 40,00        | 40,00        | 40,00     | 40,00       | 23,53      |
| 40,00       | 40,00       | 31,39       | 40,00       | 40,00        | 40,00        | 40,00        | 40,00     | 40,00       | 21,28      |
| 40,00       | 40,00       | 40,00       | 40,00       | 40,00        | 40,00        | 40,00        | 40,00     | 40,00       | 22,08      |
| 40,00       | 40,00       | 34,51       | 40,00       | 40,00        | 40,00        | 40,00        | 40,00     | 40,00       | 24,13      |
| 40,00       | 40,00       | 40,00       | 40,00       | 40,00        | 40,00        | 40,00        | 40,00     | 40,00       | 23,38      |
| 40,00       | 40,00       | 40,00       | 40,00       | 40,00        | 40,00        | 40,00        | 40,00     | 40,00       | 23,93      |
| 40,00       | 40,00       | 40,00       | 40,00       | 40,00        | 40,00        | 40,00        | 40,00     | 40,00       | 24,60      |
| 40,00       | 40,00       | 40,00       | 40,00       | 40,00        | 40,00        | 40,00        | 40,00     | 40,00       | 23,45      |
| 40,00       | 40,00       | 40,00       | 40,00       | 40,00        | 40,00        | 40,00        | 40,00     | 40,00       | 24,14      |
| 40,00       | 40,00       | 33,15       | 40,00       | 40,00        | 40,00        | 40,00        | 40,00     | 40,00       | 24,67      |
| 40,00       | 40,00       | 36,32       | 40,00       | 40,00        | 40,00        | 40,00        | 40,00     | 39,37       | 22,50      |
| 40,00       | 40,00       | 40,00       | 40,00       | 40,00        | 40,00        | 40,00        | 40,00     | 40,00       | 21,98      |
| 40,00       | 40,00       | 36,68       | 40,00       | 40,00        | 40,00        | 40,00        | 40,00     | 37,06       | 21,38      |
| 40,00       | 40,00       | 33,01       | 40,00       | 40,00        | 40,00        | 40,00        | 40,00     | 39,33       | 21,98      |
| 40,00       | 40,00       | 35,01       | 40,00       | 40,00        | 40,00        | 40,00        | 40,00     | 40,00       | 23,13      |
| 40,00       | 40,00       | 33,77       | 40,00       | 40,00        | 40,00        | 40,00        | 40,00     | 36,65       | 20,91      |
| 40,00       | 40,00       | 31,98       | 40,00       | 40,00        | 40,00        | 40,00        | 40,00     | 36,82       | 21,89      |
| 40,00       | 40,00       | 32,23       | 40,00       | 40,00        | 40,00        | 40,00        | 40,00     | 40,00       | 23,04      |
| 40,00       | 40,00       | 33,14       | 40,00       | 40,00        | 40,00        | 40,00        | 40,00     | 37,14       | 23,25      |
| 40,00       | 40,00       | 31,08       | 40,00       | 40,00        | 40,00        | 40,00        | 40,00     | 35,73       | 20,99      |
| 40,00       | 40,00       | 31,30       | 40,00       | 40,00        | 40,00        | 40,00        | 40,00     | 40,00       | 21,92      |
| 40,00       | 40,00       | 29,62       | 40,00       | 36,34        | 40,00        | 40,00        | 40,00     | 36,44       | 21,99      |
| 40,00       | 40,00       | 32,39       | 40,00       | 37,41        | 40,00        | 40,00        | 40,00     | 38,99       | 21,77      |
| 40,00       | 40,00       | 34,78       | 40,00       | 40,00        | 40,00        | 40,00        | 40,00     | 40,00       | 22,97      |
| 40,00       | 40,00       | 31,61       | 40,00       | 40,00        | 40,00        | 40,00        | 40,00     | 40,00       | 21,63      |
| 40,00       | 40,00       | 37,23       | 40,00       | 40,00        | 40,00        | 40,00        | 40,00     | 40,00       | 22,35      |
| 40,00       | 40,00       | 35,40       | 40,00       | 40,00        | 40,00        | 40,00        | 40,00     | 40,00       | 22,29      |
| 40,00       | 40,00       | 34,98       | 40,00       | 40,00        | 40,00        | 40,00        | 40,00     | 40,00       | 20,97      |
| 40,00       | 40,00       | 30,98       | 40,00       | 40,00        | 40,00        | 40,00        | 40,00     | 40,00       | 21,63      |
| 40,00       | 40,00       | 32,19       | 40,00       | 40,00        | 40,00        | 40,00        | 40,00     | 40,00       | 22,15      |
| 40,00       | 40,00       | 40,00       | 40,00       | 40,00        | 40,00        | 40,00        | 40,00     | 23,40       | 34,56      |

| hsa-miR-98 | hsa-miR-99a | hsa-miR-99b | mmu-miR-124a | mmu-miR-129-3p | mmu-miR-134 | mmu-miR-137 | mmu-miR-140 | mmu-miR-153 |
|------------|-------------|-------------|--------------|----------------|-------------|-------------|-------------|-------------|
| 40,00      | 40,00       | 33,75       | 40,00        | 40,00          | 27,43       | 40,00       | 27,71       | 40,00       |
| 40,00      | 40,00       | 40,00       | 40,00        | 40,00          | 30,42       | 40,00       | 30,42       | 40,00       |
| 40,00      | 40,00       | 31,89       | 40,00        | 40,00          | 30,64       | 40,00       | 25,64       | 40,00       |
| 40,00      | 40,00       | 28,93       | 40,00        | 40,00          | 26,76       | 40,00       | 23,86       | 40,00       |
| 40,00      | 34,38       | 31,44       | 40,00        | 40,00          | 27,89       | 40,00       | 25,82       | 40,00       |
| 40,00      | 33,40       | 31,05       | 40,00        | 40,00          | 32,70       | 40,00       | 26,73       | 40,00       |
| 40,00      | 33,99       | 33,42       | 40,00        | 40,00          | 34,91       | 40,00       | 27,79       | 40,00       |
| 40,00      | 32,98       | 30,08       | 40,00        | 40,00          | 26,91       | 40,00       | 26,78       | 40,00       |
| 40,00      | 30,31       | 25,49       | 40,00        | 40,00          | 26,27       | 40,00       | 23,83       | 40,00       |
| 40,00      | 30,25       | 27,76       | 40,00        | 40,00          | 27,83       | 40,00       | 24,22       | 40,00       |
| 40,00      | 32,03       | 30,64       | 40,00        | 40,00          | 28,40       | 40,00       | 26,76       | 40,00       |
| 40,00      | 40,00       | 30,67       | 40,00        | 40,00          | 33,12       | 40,00       | 27,15       | 40,00       |
| 40,00      | 33,08       | 28,10       | 40,00        | 40,00          | 30,86       | 40,00       | 26,18       | 40,00       |
| 40,00      | 33,21       | 31,85       | 40,00        | 40,00          | 32,57       | 40,00       | 27,74       | 40,00       |
| 40,00      | 40,00       | 32,01       | 40,00        | 40,00          | 40,00       | 40,00       | 27,40       | 40,00       |
| 40,00      | 32,60       | 29,58       | 40,00        | 40,00          | 35,97       | 40,00       | 27,13       | 40,00       |
| 40,00      | 40,00       | 31,82       | 40,00        | 40,00          | 30,88       | 40,00       | 27,55       | 40,00       |
| 40,00      | 40,00       | 31,50       | 40,00        | 40,00          | 32,04       | 40,00       | 32,99       | 40,00       |
| 40,00      | 35,21       | 30,76       | 40,00        | 40,00          | 33,17       | 40,00       | 28,13       | 40,00       |
| 40,00      | 40,00       | 35,35       | 40,00        | 40,00          | 37,69       | 40,00       | 30,05       | 40,00       |
| 40,00      | 34,17       | 32,75       | 40,00        | 40,00          | 34,63       | 40,00       | 27,29       | 40,00       |
| 40,00      | 37,75       | 29,43       | 40,00        | 40,00          | 36,53       | 40,00       | 27,08       | 40,00       |
| 36,78      | 32,65       | 29,43       | 40,00        | 40,00          | 38,51       | 40,00       | 26,57       | 40,00       |
| 33,25      | 32,38       | 27,49       | 40,00        | 40,00          | 34,52       | 40,00       | 26,33       | 40,00       |
| 32,69      | 30,37       | 29,08       | 40,00        | 40,00          | 38,74       | 40,00       | 25,71       | 40,00       |
| 40,00      | 32,86       | 30,81       | 40,00        | 40,00          | 37,73       | 40,00       | 27,09       | 40,00       |
| 37,27      | 32,42       | 28,58       | 40,00        | 40,00          | 37,05       | 40,00       | 25,66       | 40,00       |
| 35,71      | 39,16       | 29,50       | 40,00        | 40,00          | 32,51       | 40,00       | 25,60       | 40,00       |
| 34,24      | 40,00       | 30,47       | 40,00        | 40,00          | 35,63       | 40,00       | 28,16       | 40,00       |
| 40,00      | 37,82       | 29,35       | 40,00        | 40,00          | 32,99       | 40,00       | 26,97       | 40,00       |
| 36,36      | 31,17       | 27,86       | 40,00        | 40,00          | 32,00       | 40,00       | 24,95       | 40,00       |
| 31,66      | 31,53       | 28,15       | 40,00        | 40,00          | 31,67       | 40,00       | 24,87       | 40,00       |
| 35,32      | 33,41       | 27,19       | 40,00        | 40,00          | 31,32       | 40,00       | 24,82       | 40,00       |
| 40,00      | 33,57       | 29,27       | 40,00        | 40,00          | 32,24       | 40,00       | 26,45       | 40,00       |
| 36,11      | 40,00       | 30,42       | 40,00        | 40,00          | 34,91       | 40,00       | 28,24       | 40,00       |
| 36,96      | 38,07       | 27,16       | 40,00        | 40,00          | 33,03       | 40,00       | 27,06       | 40,00       |
| 35,44      | 32,08       | 29,05       | 40,00        | 40,00          | 33,77       | 40,00       | 26,56       | 40,00       |
| 40,00      | 32,45       | 29,76       | 40,00        | 40,00          | 37,24       | 40,00       | 27,05       | 40,00       |
| 37,59      | 31,19       | 27,22       | 40,00        | 40,00          | 35,95       | 40,00       | 25,63       | 40,00       |
| 40,00      | 31,91       | 27,43       | 40,00        | 40,00          | 30,62       | 40,00       | 26,44       | 40,00       |
| 40,00      | 30,55       | 30,15       | 40,00        | 40,00          | 31,09       | 40,00       | 27,80       | 40,00       |
| 40,00      | 40,00       | 31,02       | 40,00        | 40,00          | 36,04       | 40,00       | 29,51       | 40,00       |

| mmu-miR-187 | mmu-miR-374-5p | mmu-miR-379 | mmu-miR-451 | mmu-miR-491 | mmu-miR-495 | mmu-miR-496 | mmu-miR-499 | mmu-miR-615 |
|-------------|----------------|-------------|-------------|-------------|-------------|-------------|-------------|-------------|
| 40,00       | 25,23          | 40,00       | 30,96       | 33,18       | 30,34       | 40,00       | 40,00       | 40,00       |
| 40,00       | 25,70          | 40,00       | 31,96       | 40,00       | 40,00       | 40,00       | 40,00       | 40,00       |
| 40,00       | 26,56          | 34,50       | 29,26       | 30,33       | 30,13       | 40,00       | 40,00       | 40,00       |
| 40,00       | 23,77          | 31,91       | 28,10       | 29,28       | 28,64       | 40,00       | 40,00       | 40,00       |
| 40,00       | 26,98          | 33,14       | 29,93       | 31,63       | 27,86       | 40,00       | 40,00       | 37,38       |
| 40,00       | 27,38          | 31,08       | 27,44       | 31,54       | 31,10       | 40,00       | 40,00       | 40,00       |
| 40,00       | 30,08          | 40,00       | 28,19       | 37,50       | 40,00       | 40,00       | 40,00       | 40,00       |
| 40,00       | 24,79          | 30,70       | 23,98       | 31,43       | 28,15       | 40,00       | 40,00       | 40,00       |
| 35,11       | 24,19          | 25,59       | 22,33       | 27,22       | 25,01       | 34,60       | 40,00       | 40,00       |
| 40,00       | 22,30          | 28,60       | 20,96       | 28,18       | 28,44       | 40,00       | 34,71       | 40,00       |
| 40,00       | 24,11          | 30,76       | 24,21       | 31,49       | 28,72       | 40,00       | 40,00       | 40,00       |
| 38,26       | 26,91          | 32,33       | 26,27       | 31,29       | 28,82       | 40,00       | 40,00       | 40,00       |
| 40,00       | 25,87          | 30,26       | 26,41       | 30,87       | 28,20       | 40,00       | 40,00       | 40,00       |
| 40,00       | 28,57          | 40,00       | 23,73       | 32,32       | 30,01       | 40,00       | 40,00       | 40,00       |
| 40,00       | 25,13          | 40,00       | 28,31       | 33,25       | 30,75       | 40,00       | 40,00       | 40,00       |
| 40,00       | 27,30          | 31,25       | 27,51       | 31,35       | 32,29       | 40,00       | 40,00       | 40,00       |
| 40,00       | 24,90          | 40,00       | 28,08       | 31,56       | 31,76       | 40,00       | 40,00       | 40,00       |
| 40,00       | 40,00          | 40,00       | 29,29       | 40,00       | 34,56       | 40,00       | 40,00       | 40,00       |
| 40,00       | 27,40          | 36,94       | 27,24       | 32,80       | 30,97       | 40,00       | 40,00       | 40,00       |
| 40,00       | 32,01          | 33,85       | 26,03       | 37,33       | 32,60       | 40,00       | 40,00       | 40,00       |
| 40,00       | 27,09          | 32,09       | 26,26       | 33,85       | 30,31       | 40,00       | 40,00       | 40,00       |
| 40,00       | 26,98          | 33,75       | 23,88       | 32,26       | 30,07       | 40,00       | 40,00       | 40,00       |
| 40,00       | 27,26          | 32,78       | 21,58       | 31,59       | 29,86       | 33,51       | 40,00       | 40,00       |
| 40,00       | 26,23          | 31,01       | 23,69       | 30,73       | 28,03       | 40,00       | 40,00       | 40,00       |
| 40,00       | 25,40          | 35,14       | 21,77       | 29,27       | 28,79       | 40,00       | 40,00       | 40,00       |
| 40,00       | 28,72          | 32,41       | 23,26       | 40,00       | 31,00       | 40,00       | 40,00       | 40,00       |
| 40,00       | 25,84          | 34,90       | 21,04       | 30,77       | 28,19       | 37,61       | 40,00       | 31,07       |
| 40,00       | 26,67          | 33,69       | 23,40       | 31,95       | 28,25       | 40,00       | 40,00       | 40,00       |
| 40,00       | 29,04          | 31,93       | 27,42       | 30,96       | 29,22       | 40,00       | 40,00       | 40,00       |
| 40,00       | 26,32          | 31,15       | 24,96       | 30,98       | 29,03       | 40,00       | 40,00       | 40,00       |
| 40,00       | 24,58          | 29,88       | 22,88       | 29,65       | 27,06       | 34,21       | 40,00       | 40,00       |
| 40,00       | 24,48          | 32,57       | 22,02       | 28,69       | 28,09       | 34,22       | 40,00       | 40,00       |
| 37,47       | 24,04          | 28,99       | 24,15       | 28,99       | 26,39       | 34,87       | 40,00       | 40,00       |
| 40,00       | 26,61          | 31,33       | 22,64       | 30,25       | 27,28       | 40,00       | 40,00       | 40,00       |
| 40,00       | 30,40          | 40,00       | 23,96       | 33,63       | 30,42       | 40,00       | 40,00       | 40,00       |
| 40,00       | 27,59          | 31,37       | 24,56       | 31,34       | 26,94       | 33,65       | 40,00       | 40,00       |
| 40,00       | 26,93          | 40,00       | 25,05       | 30,94       | 30,00       | 40,00       | 40,00       | 40,00       |
| 40,00       | 27,75          | 40,00       | 23,30       | 31,35       | 30,22       | 40,00       | 40,00       | 40,00       |
| 40,00       | 25,66          | 40,00       | 23,00       | 29,93       | 29,29       | 40,00       | 40,00       | 40,00       |
| 40,00       | 26,80          | 33,24       | 25,30       | 30,05       | 27,52       | 40,00       | 40,00       | 40,00       |
| 40,00       | 28,01          | 40,00       | 22,13       | 32,17       | 29,25       | 40,00       | 40,00       | 40,00       |
| 40,00       | 31,15          | 40,00       | 24,96       | 40,00       | 30,61       | 40,00       | 40,00       | 40,00       |

| <b>mmu-miR-93</b> | <b>mmu-miR-96</b> | <b>RNU44</b> | <b>RNU48</b> | <b>U6 snRNA</b> |
|-------------------|-------------------|--------------|--------------|-----------------|
| 27,18             | 40,00             | 40,00        | 40,00        | 30,34           |
| 29,83             | 40,00             | 40,00        | 40,00        | 29,96           |
| 25,88             | 40,00             | 40,00        | 40,00        | 27,63           |
| 23,79             | 40,00             | 40,00        | 33,62        | 26,81           |
| 24,92             | 40,00             | 40,00        | 34,83        | 28,99           |
| 25,73             | 40,00             | 40,00        | 40,00        | 27,22           |
| 26,76             | 40,00             | 40,00        | 40,00        | 30,45           |
| 24,49             | 40,00             | 40,00        | 34,03        | 29,34           |
| 21,86             | 40,00             | 40,00        | 33,25        | 27,86           |
| 21,73             | 40,00             | 40,00        | 40,00        | 24,29           |
| 24,27             | 40,00             | 40,00        | 40,00        | 30,52           |
| 25,60             | 40,00             | 40,00        | 40,00        | 29,90           |
| 23,51             | 40,00             | 40,00        | 40,00        | 29,41           |
| 24,18             | 40,00             | 40,00        | 34,88        | 30,83           |
| 26,44             | 40,00             | 40,00        | 40,00        | 31,48           |
| 25,72             | 40,00             | 40,00        | 40,00        | 30,95           |
| 26,61             | 40,00             | 40,00        | 40,00        | 30,93           |
| 28,25             | 40,00             | 40,00        | 40,00        | 29,44           |
| 26,34             | 40,00             | 40,00        | 40,00        | 29,30           |
| 27,67             | 40,00             | 40,00        | 40,00        | 30,03           |
| 26,60             | 40,00             | 40,00        | 40,00        | 31,19           |
| 24,62             | 40,00             | 40,00        | 34,69        | 30,14           |
| 24,09             | 40,00             | 40,00        | 33,66        | 29,09           |
| 24,07             | 40,00             | 40,00        | 40,00        | 28,83           |
| 23,60             | 40,00             | 40,00        | 35,58        | 29,04           |
| 25,64             | 40,00             | 40,00        | 33,10        | 29,92           |
| 23,14             | 40,00             | 40,00        | 40,00        | 28,70           |
| 23,68             | 40,00             | 40,00        | 40,00        | 26,24           |
| 26,28             | 40,00             | 40,00        | 40,00        | 30,25           |
| 25,30             | 40,00             | 40,00        | 40,00        | 31,50           |
| 23,25             | 40,00             | 40,00        | 34,62        | 30,37           |
| 22,88             | 40,00             | 40,00        | 40,00        | 29,85           |
| 23,32             | 40,00             | 40,00        | 35,92        | 30,22           |
| 23,81             | 40,00             | 40,00        | 40,00        | 28,63           |
| 25,36             | 40,00             | 40,00        | 40,00        | 30,74           |
| 24,20             | 40,00             | 40,00        | 40,00        | 30,72           |
| 24,82             | 40,00             | 40,00        | 40,00        | 30,95           |
| 25,57             | 40,00             | 40,00        | 35,98        | 30,03           |
| 23,77             | 40,00             | 40,00        | 35,71        | 29,16           |
| 24,28             | 40,00             | 40,00        | 35,00        | 29,48           |
| 24,76             | 40,00             | 40,00        | 40,00        | 30,68           |
| 26,34             | 40,00             | 40,00        | 40,00        | 30,49           |

**Additional File 7 B.** Raw data of biomarker discovery utilizing commercial TaqMan microRNA Assays.

| Age | Gender | Smoking status | Study group              | Histological subtyp | miR-24 | miR-28-3p | miR-132-3p | miR-146b-5p |
|-----|--------|----------------|--------------------------|---------------------|--------|-----------|------------|-------------|
| 54  | Male   | Ever           | Mesothelioma             | Biphasic            | 21,50  | 26,99     | 29,98      | 26,75       |
| 72  | Male   | Ever           | Mesothelioma             | Biphasic            | 24,97  | 28,95     | 33,84      | 29,49       |
| 68  | Male   | Never          | Mesothelioma             | Epithelioid         | 21,43  | 26,25     | 28,72      | 25,38       |
| 34  | Male   | Ever           | Mesothelioma             | Epithelioid         | 19,34  | 23,86     | 27,00      | 23,22       |
| 70  | Male   | Never          | Mesothelioma             | Biphasic            | 21,39  | 25,31     | 28,61      | 25,32       |
| 59  | Male   | Never          | Mesothelioma             | Epithelioid         | 22,10  | 25,96     | 29,03      | 25,74       |
| 74  | Male   | Never          | Mesothelioma             | Epithelioid         | 23,65  | 27,94     | 30,66      | 27,61       |
| 73  | Male   | Never          | Mesothelioma             | Epithelioid         | 21,43  | 25,04     | 27,18      | 25,17       |
| 72  | Male   | Never          | Mesothelioma             | Sarcomatoid         | 19,28  | 23,22     | 24,76      | 22,21       |
| 66  | Male   | Ever           | Mesothelioma             | Epithelioid         | 19,12  | 23,11     | 25,38      | 22,58       |
| 73  | Male   | Ever           | Mesothelioma             | Biphasic            | 21,49  | 25,95     | 27,31      | 25,42       |
| 53  | Male   | Never          | Mesothelioma             | Epithelioid         | 22,63  | 25,86     | 29,11      | 25,98       |
| 56  | Male   | Ever           | Mesothelioma             | Epithelioid         | 20,63  | 24,92     | 27,30      | 24,36       |
| 77  | Male   | Ever           | Mesothelioma             | Epithelioid         | 22,14  | 25,99     | 26,76      | 25,55       |
| 84  | Male   | Never          | Mesothelioma             | Epithelioid         | 22,72  | 27,00     | 31,16      | 26,45       |
| 76  | Male   | Ever           | Mesothelioma             | Sarcomatoid         | 22,66  | 26,95     | 29,53      | 26,15       |
| 72  | Male   | Ever           | Mesothelioma             | Epithelioid         | 22,86  | 26,95     | 30,71      | 25,99       |
| 77  | Male   | Ever           | Mesothelioma             | Sarcomatoid         | 25,34  | 29,35     | 35,00      | 28,26       |
| 85  | Male   | Ever           | Mesothelioma             | Epithelioid         | 23,33  | 27,05     | 31,72      | 25,93       |
| 78  | Male   | Never          | Mesothelioma             | Epithelioid         | 25,77  | 28,98     | 32,13      | 27,60       |
| 68  | Male   | Ever           | Mesothelioma             | Epithelioid         | 24,02  | 27,89     | 31,22      | 27,23       |
| 67  | Male   | Ever           | Asbestos-exposed control |                     | 21,42  | 26,25     | 27,21      | 25,96       |
| 71  | Male   | Ever           | Asbestos-exposed control |                     | 21,90  | 26,70     | 28,38      | 26,39       |
| 79  | Male   | Ever           | Asbestos-exposed control |                     | 20,24  | 25,45     | 26,31      | 24,74       |
| 72  | Male   | Never          | Asbestos-exposed control |                     | 20,00  | 25,30     | 27,04      | 25,25       |
| 77  | Male   | Ever           | Asbestos-exposed control |                     | 22,29  | 28,31     | 28,60      | 27,02       |
| 68  | Male   | Ever           | Asbestos-exposed control |                     | 20,56  | 25,95     | 26,96      | 24,89       |
| 79  | Male   | Never          | Asbestos-exposed control |                     | 20,08  | 25,56     | 26,26      | 25,04       |
| 71  | Male   | Never          | Asbestos-exposed control |                     | 22,36  | 27,07     | 29,77      | 26,89       |
| 75  | Male   | Never          | Asbestos-exposed control |                     | 20,54  | 25,43     | 27,54      | 25,16       |
| 43  | Male   | Ever           | Asbestos-exposed control |                     | 20,04  | 24,36     | 26,39      | 24,82       |
| 78  | Male   | Ever           | Asbestos-exposed control |                     | 19,37  | 24,27     | 25,69      | 23,71       |
| 72  | Male   | Ever           | Asbestos-exposed control |                     | 19,05  | 24,65     | 26,71      | 24,41       |
| 72  | Male   | Never          | Asbestos-exposed control |                     | 19,20  | 23,86     | 25,94      | 23,51       |
| 57  | Male   | Ever           | Asbestos-exposed control |                     | 20,06  | 25,06     | 26,75      | 24,58       |
| 53  | Male   | Never          | Asbestos-exposed control |                     | 22,25  | 27,66     | 29,75      | 27,48       |
| 69  | Male   | Never          | Asbestos-exposed control |                     | 20,85  | 25,85     | 27,17      | 25,29       |
| 57  | Male   | Never          | Asbestos-exposed control |                     | 20,52  | 25,34     | 26,78      | 25,16       |
| 81  | Male   | Ever           | Asbestos-exposed control |                     | 22,12  | 26,97     | 28,02      | 26,35       |
| 75  | Male   | Ever           | Asbestos-exposed control |                     | 19,80  | 24,62     | 26,15      | 24,01       |
| 55  | Male   | Ever           | Asbestos-exposed control |                     | 21,95  | 26,79     | 28,54      | 26,18       |
| 82  | Male   | Never          | Asbestos-exposed control |                     | 22,84  | 26,93     | 28,36      | 27,34       |



**Additional File 7 C.** Raw data of biomarker verification utilizing commercial TaqMan microRNA Assays.

| Age | Gender | Smoking status | Study group              | Histological subtyp | miR-16 | miR-24 | miR-28-3p | miR-126 | miR-132-3p | miR-146b-5p | miR-625-3p | U6-snRNA |
|-----|--------|----------------|--------------------------|---------------------|--------|--------|-----------|---------|------------|-------------|------------|----------|
| 85  | Male   | Ever           | Mesothelioma             | Biphasic            | 23,14  | 23,61  | 29,31     | 27,40   | 31,71      | 26,06       | 30,09      | 29,86    |
| 73  | Male   | Ever           | Mesothelioma             | not available       | 20,96  | 21,20  | 26,16     | 24,95   | 28,56      | 25,24       | 27,06      | 27,48    |
| 68  | Male   | Never          | Mesothelioma             | not available       | 20,25  | 21,26  | 26,92     | 23,74   | 28,99      | 24,43       | 28,46      | 30,81    |
| 71  | Male   | Never          | Mesothelioma             | not available       | 22,77  | 25,15  | 31,04     | 27,05   | 31,92      | 29,09       | 32,19      | 27,07    |
| 51  | Male   | not available  | Mesothelioma             | Epithelioid         | 20,08  | 21,27  | 27,02     | 26,74   | 28,77      | 24,81       | 29,10      | 29,96    |
| 71  | Male   | Ever           | Mesothelioma             | Epithelioid         | 21,54  | 22,70  | 28,26     | 27,71   | 30,43      | 26,02       | 27,76      | 29,69    |
| 53  | Male   | Never          | Mesothelioma             | Epithelioid         | 21,72  | 21,84  | 27,94     | 25,19   | 29,57      | 24,73       | 27,69      | 30,40    |
| 55  | Male   | Ever           | Mesothelioma             | Epithelioid         | 22,56  | 22,29  | 28,93     | 27,13   | 30,82      | 24,71       | 29,35      | 32,19    |
| 75  | Male   | Never          | Mesothelioma             | Sarcomatoid         | 22,14  | 19,62  | 24,41     | 27,46   | 26,79      | 23,21       | 28,25      | 28,11    |
| 71  | Male   | Never          | Mesothelioma             | Epithelioid         | 21,93  | 19,67  | 24,78     | 27,55   | 27,33      | 23,57       | 30,49      | 30,00    |
| 67  | Male   | not available  | Mesothelioma             | Epithelioid         | 19,75  | 19,86  | 24,68     | 24,17   | 26,99      | 22,79       | 28,33      | 28,29    |
| 76  | Male   | Never          | Mesothelioma             | Epithelioid         | 18,89  | 18,71  | 24,25     | 27,49   | 25,77      | 22,42       | 25,96      | 28,40    |
| 72  | Male   | Never          | Mesothelioma             | Epithelioid         | 20,12  | 20,19  | 25,28     | 24,48   | 27,56      | 23,43       | 28,36      | 29,37    |
| 76  | Male   | Ever           | Mesothelioma             | not available       | 18,39  | 19,74  | 24,57     | 23,27   | 27,49      | 23,56       | 25,47      | 27,81    |
| 76  | Male   | Never          | Mesothelioma             | Epithelioid         | 20,13  | 23,17  | 28,06     | 26,49   | 30,01      | 26,45       | 29,14      | 30,77    |
| 75  | Male   | Ever           | Mesothelioma             | Epithelioid         | 18,26  | 18,43  | 23,22     | 27,10   | 25,72      | 22,05       | 26,44      | 25,54    |
| 77  | Male   | Never          | Mesothelioma             | Epithelioid         | 18,38  | 20,06  | 25,90     | 27,91   | 28,63      | 25,17       | 31,63      | 29,73    |
| 67  | Male   | Ever           | Mesothelioma             | Epithelioid         | 21,08  | 22,13  | 25,99     | 27,56   | 29,21      | 26,29       | 28,99      | 26,88    |
| 72  | Male   | Ever           | Mesothelioma             | Biphasic            | 19,44  | 20,22  | 25,12     | 31,82   | 27,76      | 24,42       | 28,99      | 28,51    |
| 75  | Male   | Never          | Mesothelioma             | Epithelioid         | 20,23  | 20,85  | 26,10     | 28,69   | 28,25      | 24,87       | 28,05      | 30,30    |
| 62  | Male   | Ever           | Mesothelioma             | Epithelioid         | 17,02  | 16,97  | 21,69     | 24,83   | 24,39      | 20,40       | 24,16      | 28,36    |
| 39  | Male   | Never          | Mesothelioma             | Sarcomatoid         | 16,95  | 19,07  | 24,73     | 35,00   | 26,84      | 24,19       | 24,80      | 29,69    |
| 55  | Male   | Ever           | Asbestos-exposed control |                     | 27,35  | 24,86  | 27,79     | 27,61   | 30,77      | 28,87       | 34,30      | 34,82    |
| 57  | Male   | Ever           | Asbestos-exposed control |                     | 22,98  | 22,13  | 25,17     | 23,84   | 28,66      | 25,94       | 28,71      | 32,85    |
| 55  | Male   | Ever           | Asbestos-exposed control |                     | 21,35  | 22,39  | 25,33     | 23,17   | 28,41      | 24,86       | 30,99      | 31,03    |
| 59  | Male   | Never          | Asbestos-exposed control |                     | 24,84  | 25,82  | 29,04     | 26,99   | 31,22      | 27,41       | 33,16      | 32,92    |
| 53  | Male   | Never          | Asbestos-exposed control |                     | 26,42  | 24,88  | 26,40     | 27,09   | 29,65      | 26,91       | 34,51      | 32,09    |
| 68  | Male   | Never          | Asbestos-exposed control |                     | 25,74  | 24,85  | 26,65     | 27,43   | 30,32      | 26,92       | 34,24      | 29,92    |
| 71  | Male   | Never          | Asbestos-exposed control |                     | 22,42  | 23,46  | 27,21     | 24,69   | 30,11      | 24,74       | 32,54      | 34,30    |
| 73  | Male   | Ever           | Asbestos-exposed control |                     | 24,85  | 25,47  | 28,14     | 26,96   | 31,63      | 27,61       | 32,05      | 33,22    |
| 75  | Male   | Ever           | Asbestos-exposed control |                     | 31,96  | 24,02  | 29,19     | 31,89   | 31,06      | 29,10       | 34,96      | 32,67    |
| 77  | Male   | Never          | Asbestos-exposed control |                     | 24,66  | 22,14  | 27,99     | 26,38   | 30,02      | 26,95       | 31,44      | 31,33    |
| 71  | Male   | Ever           | Asbestos-exposed control |                     | 26,12  | 24,10  | 27,21     | 27,31   | 29,90      | 26,53       | 33,17      | 31,16    |
| 62  | Male   | Ever           | Asbestos-exposed control |                     | 27,75  | 21,65  | 27,10     | 28,23   | 29,56      | 26,08       | 30,95      | 33,48    |
| 75  | Male   | Never          | Asbestos-exposed control |                     | 21,19  | 21,92  | 26,02     | 23,26   | 28,46      | 24,45       | 30,44      | 33,86    |
| 76  | Male   | Never          | Asbestos-exposed control |                     | 19,31  | 20,46  | 26,04     | 21,96   | 28,17      | 25,16       | 28,82      | 32,57    |
| 67  | Male   | Ever           | Asbestos-exposed control |                     | 21,87  | 21,71  | 27,53     | 24,73   | 29,38      | 26,56       | 30,26      | 30,11    |
| 76  | Male   | Never          | Asbestos-exposed control |                     | 35,00  | 23,01  | 28,46     | 35,00   | 29,77      | 25,55       | 35,00      | 35,00    |
| 67  | Male   | not available  | Asbestos-exposed control |                     | 20,87  | 20,71  | 28,15     | 23,34   | 28,56      | 25,39       | 29,34      | 32,93    |
| 71  | Male   | Never          | Asbestos-exposed control |                     | 29,63  | 24,44  | 26,31     | 28,98   | 28,67      | 25,83       | 33,99      | 33,35    |
| 77  | Male   | Never          | Asbestos-exposed control |                     | 24,11  | 21,97  | 26,93     | 25,47   | 29,56      | 26,10       | 31,40      | 32,20    |
| 73  | Male   | Ever           | Asbestos-exposed control |                     | 22,86  | 24,36  | 27,79     | 26,45   | 29,77      | 26,76       | 32,76      | 30,50    |
| 71  | Male   | Ever           | Asbestos-exposed control |                     | 23,44  | 22,15  | 24,72     | 24,70   | 28,10      | 24,91       | 31,18      | 31,60    |
| 85  | Male   | Ever           | Asbestos-exposed control |                     | 20,95  | 21,34  | 24,72     | 23,11   | 27,72      | 24,03       | 28,15      | 29,77    |
| 75  | Male   | Never          | Asbestos-exposed control |                     | 25,27  | 24,57  | 26,92     | 26,96   | 29,68      | 26,44       | 32,29      | 31,85    |
| 62  | Male   | Ever           | Asbestos-exposed control |                     | 24,73  | 22,15  | 27,66     | 26,20   | 29,42      | 26,20       | 30,95      | 31,37    |
| 76  | Male   | Ever           | Asbestos-exposed control |                     | 20,44  | 20,89  | 27,24     | 23,09   | 28,22      | 25,00       | 30,08      | 31,09    |
| 67  | Male   | not available  | Asbestos-exposed control |                     | 24,45  | 23,02  | 28,71     | 26,43   | 30,51      | 27,11       | 35,00      | 32,40    |
| 75  | Male   | Ever           | Asbestos-exposed control |                     | 35,00  | 27,36  | 30,02     | 35,00   | 34,20      | 35,00       | 35,00      | 35,00    |
| 67  | Male   | Ever           | Asbestos-exposed control |                     | 24,59  | 21,72  | 27,09     | 25,87   | 29,16      | 26,24       | 32,29      | 26,55    |
| 76  | Male   | Never          | Asbestos-exposed control |                     | 33,96  | 24,39  | 29,23     | 34,46   | 31,37      | 28,58       | 35,44      | 31,85    |
| 68  | Male   | Never          | Asbestos-exposed control |                     | 26,41  | 25,50  | 27,63     | 27,97   | 30,46      | 27,22       | 32,72      | 34,79    |
| 61  | Male   | Never          | Asbestos-exposed control |                     | 23,90  | 24,07  | 27,29     | 26,17   | 29,60      | 26,30       | 32,44      | 31,27    |
| 71  | Male   | Never          | Asbestos-exposed control |                     | 32,44  | 24,07  | 27,91     | 26,34   | 29,56      | 27,05       | 34,32      | 32,60    |
| 85  | Male   | Ever           | Asbestos-exposed control |                     | 25,87  | 24,09  | 29,70     | 27,36   | 31,02      | 26,15       | 33,90      | 34,20    |
| 71  | Male   | Never          | Asbestos-exposed control |                     | 23,34  | 27,70  | 27,40     | 31,99   | 30,05      | 29,60       | 35,00      | 34,21    |
| 61  | Male   | Never          | Asbestos-exposed control |                     | 24,71  | 25,22  | 28,80     | 27,24   | 30,60      | 27,60       | 35,00      | 31,11    |
| 76  | Male   | Ever           | Asbestos-exposed control |                     | 24,52  | 22,25  | 27,96     | 26,94   | 29,37      | 26,27       | 31,57      | 32,69    |
| 49  | Male   | Ever           | Asbestos-exposed control |                     | 20,88  | 22,46  | 27,19     | 23,59   | 29,12      | 25,14       | 29,30      | 32,71    |
| 72  | Male   | Never          | Asbestos-exposed control |                     | 26,11  | 24,87  | 30,19     | 28,48   | 31,30      | 27,92       | 33,89      | 32,34    |
| 75  | Male   | Never          | Asbestos-exposed control |                     | 35,00  | 24,35  | 29,47     | 35,00   | 33,05      | 35,00       | 35,00      | 33,18    |
| 72  | Male   | Ever           | Asbestos-exposed control |                     | 26,33  | 22,62  | 28,26     | 27,69   | 29,73      | 27,33       | 33,84      | 33,74    |
| 72  | Male   | Ever           | Asbestos-exposed control |                     | 30,96  | 22,36  | 27,32     | 29,32   | 29,77      | 25,88       | 33,60      | 30,05    |
| 76  | Male   | Never          | Asbestos-exposed control |                     | 27,69  | 22,42  | 26,72     | 28,40   | 29,68      | 26,17       | 32,02      | 30,70    |
| 75  | Male   | Never          | Asbestos-exposed control |                     | 26,97  | 20,05  | 26,13     | 27,53   | 28,44      | 25,58       | 31,38      | 31,73    |
| 72  | Male   | Never          | Asbestos-exposed control |                     | 27,17  | 23,94  | 29,05     | 29,03   | 30,59      | 28,20       | 34,15      | 31,03    |

**Additional File 7D.** Raw data of miRNAs in plasma samples spiked-in with lysed erythrocytes.

| miRNA       | Subject | Grade of hemolysis (%) |       |       |       |       |       |
|-------------|---------|------------------------|-------|-------|-------|-------|-------|
|             |         | 0                      | 0.125 | 0.25  | 0.5   | 1     | 2     |
| miR-20b     | 1       | 26,42                  | 27,41 | 25,78 | 24,41 | 23,52 | 22,09 |
|             | 2       | 25,22                  | 24,13 | 24,34 | 22,93 | 21,50 | 20,45 |
|             | 3       | 29,36                  | 27,78 | 26,47 | 25,98 | 25,00 | 22,15 |
| miR-24      | 1       | 21,58                  | 23,30 | 22,23 | 21,70 | 21,95 | 21,13 |
|             | 2       | 20,51                  | 22,91 | 22,69 | 22,31 | 21,83 | 21,74 |
|             | 3       | 24,53                  | 24,05 | 24,21 | 24,12 | 23,50 | 22,11 |
| miR-28-3p   | 1       | 25,09                  | 26,73 | 26,39 | 26,24 | 26,90 | 25,17 |
|             | 2       | 25,24                  | 27,26 | 27,99 | 27,83 | 26,48 | 26,77 |
|             | 3       | 29,19                  | 30,03 | 29,55 | 29,17 | 28,23 | 27,27 |
| miR-132-3p  | 1       | 28,36                  | 28,61 | 28,92 | 28,11 | 29,24 | 27,34 |
|             | 2       | 28,97                  | 30,69 | 30,06 | 29,25 | 27,99 | 27,26 |
|             | 3       | 29,08                  | 29,09 | 29,58 | 28,91 | 28,53 | 28,95 |
| miR-140-3p  | 1       | 26,34                  | 26,14 | 25,16 | 25,23 | 24,42 | 23,09 |
|             | 2       | 27,18                  | 26,02 | 26,75 | 25,97 | 23,99 | 22,50 |
|             | 3       | 28,19                  | 27,31 | 26,22 | 26,01 | 23,70 | 23,68 |
| miR-146b    | 1       | 25,03                  | 26,94 | 25,76 | 25,25 | 25,43 | 24,53 |
|             | 2       | 23,11                  | 25,31 | 25,39 | 25,24 | 24,25 | 23,89 |
|             | 3       | 29,24                  | 29,70 | 29,18 | 29,36 | 28,56 | 26,22 |
| miR-155     | 1       | 27,63                  | 28,62 | 28,43 | 28,28 | 29,16 | 27,15 |
|             | 2       | 27,01                  | 29,45 | 29,48 | 29,12 | 28,82 | 28,54 |
|             | 3       | 30,14                  | 30,14 | 29,58 | 29,33 | 28,43 | 27,16 |
| miR-191     | 1       | 22,70                  | 23,29 | 22,71 | 22,04 | 21,49 | 20,67 |
|             | 2       | 20,79                  | 22,63 | 22,23 | 21,46 | 20,44 | 19,71 |
|             | 3       | 25,84                  | 25,08 | 24,84 | 24,49 | 23,50 | 21,05 |
| miR-193a-5p | 1       | 33,65                  | 33,96 | 34,70 | 33,65 | 33,09 | 32,51 |
|             | 2       | 28,56                  | 28,57 | 28,66 | 28,59 | 28,31 | 27,89 |
|             | 3       | 33,00                  | 32,80 | 33,48 | 33,52 | 31,94 | 32,29 |
| miR-328     | 1       | 30,00                  | 32,07 | 31,29 | 29,96 | 30,65 | 28,88 |
|             | 2       | 27,44                  | 29,52 | 29,75 | 29,15 | 28,29 | 27,99 |
|             | 3       | 34,58                  | 34,07 | 33,50 | 32,89 | 32,26 | 31,07 |
| miR-331     | 1       | 27,19                  | 28,31 | 27,71 | 27,22 | 26,09 | 24,70 |
|             | 2       | 25,85                  | 26,45 | 27,33 | 26,01 | 24,23 | 23,73 |
|             | 3       | 30,15                  | 30,85 | 29,72 | 28,93 | 27,66 | 25,37 |
| miR-381     | 1       | 31,18                  | 31,53 | 31,21 | 31,94 | 31,98 | 31,19 |
|             | 2       | 31,65                  | 33,18 | 34,29 | 33,36 | 33,50 | 34,33 |
|             | 3       | 31,44                  | 32,75 | 31,93 | 31,31 | 31,29 | 31,20 |
| miR-532     | 1       | 27,84                  | 28,88 | 27,52 | 26,58 | 25,70 | 24,12 |
|             | 2       | 27,47                  | 26,72 | 27,10 | 26,16 | 24,71 | 23,70 |
|             | 3       | 30,94                  | 30,16 | 29,59 | 28,71 | 26,90 | 25,10 |
| miR-628-5p  | 1       | 39,97                  | 40,00 | 40,00 | 38,13 | 37,79 | 36,25 |
|             | 2       | 33,07                  | 35,39 | 35,80 | 34,50 | 32,38 | 32,91 |
|             | 3       | 40,00                  | 40,00 | 40,00 | 39,68 | 40,00 | 37,44 |
| miR-660     | 1       | 25,50                  | 25,50 | 24,54 | 24,05 | 22,90 | 21,63 |
|             | 2       | 26,49                  | 24,62 | 25,25 | 24,38 | 22,51 | 21,95 |
|             | 3       | 26,78                  | 25,92 | 24,93 | 23,91 | 23,06 | 22,15 |
